# Supplementary material for: Evidence that the loss of colonic anti-microbial peptides may promote dysbiotic Gram-negative inflammaging-associated bacteria in aging mice
Source: Front Aging. 2024 Mar 4;5:1352299. doi: 10.3389/fragi.2024.1352299 (PMC10945560; doi:10.3389/fragi.2024.1352299)
Supplement: Supplementary file 11 [file DataSheet5.XLSX]

## Sheet: Supp.Data.Sheet.5
Supplementary Data Sheet 5: Global Differential Gene Expression Data of 2 Month- compared to 25 Month-Old Mice Groups
Gene ID	Gene Description and Accession Number	Regulation Up/Down	logFC	logCPM	2 Month	25 Month	PValue	QValue
Brd9	bromodomain containing 9 [Source:MGI Symbol;Acc:MGI:2145317]	Down	-3.44916	8.34873	11444.2	1696	5.27747e-34	8.28088e-30
Ppp1r12a	protein phosphatase 1, regulatory subunit 12A [Source:MGI Symbol;Acc:MGI:1309528]	Down	-3.21132	9.15212	19773.2	3401	1.58861e-32	1.24634e-28
Srsf11	serine and arginine-rich splicing factor 11 [Source:MGI Symbol;Acc:MGI:1916457]	Down	-2.98485	9.24458	20380.4	4035.5	3.25646e-32	1.70324e-28
Chd7	chromodomain helicase DNA binding protein 7 [Source:MGI Symbol;Acc:MGI:2444748]	Down	-3.09901	10.149	37597	7117.67	2.2456e-28	8.80894e-25
Tcof1	treacle ribosome biogenesis factor 1 [Source:MGI Symbol;Acc:MGI:892003]	Down	-2.95749	8.19152	9810	2025.17	2.20706e-27	6.92621e-24
Rp9	retinitis pigmentosa 9 (human) [Source:MGI Symbol;Acc:MGI:2157166]	Down	-2.50655	9.38319	20469.8	6239.17	1.1475e-24	3.00091e-21
Arl9	ADP-ribosylation factor-like 9 [Source:MGI Symbol;Acc:MGI:1915496]	Down	-3.69347	6.86642	4050.2	502.333	6.0491e-23	1.35595e-19
Ly6e	lymphocyte antigen 6 complex, locus E [Source:MGI Symbol;Acc:MGI:106651]	Up	2.43599	8.30165	1639.4	15053.8	3.455e-22	6.77656e-19
Nmt2	N-myristoyltransferase 2 [Source:MGI Symbol;Acc:MGI:1202298]	Down	-2.7665	6.45401	2877	686	1.07024e-20	1.8659e-17
Brd3	bromodomain containing 3 [Source:MGI Symbol;Acc:MGI:1914632]	Down	-2.60428	8.80953	14483.6	3800.5	2.82388e-20	4.13176e-17
Ncor1	nuclear receptor co-repressor 1 [Source:MGI Symbol;Acc:MGI:1349717]	Down	-2.89075	9.77075	29638	5938.33	2.89652e-20	4.13176e-17
Neat1	nuclear paraspeckle assembly transcript 1 (non-protein coding) [Source:MGI Symbol;Acc:MGI:1914211]	Up	3.39208	7.80258	691	10955.3	6.79418e-20	8.88395e-17
Cystm1	cysteine-rich transmembrane module containing 1 [Source:MGI Symbol;Acc:MGI:1913310]	Down	-1.80894	8.22125	8529.4	4060.33	2.81382e-19	3.39628e-16
Upf2	UPF2 regulator of nonsense transcripts homolog (yeast) [Source:MGI Symbol;Acc:MGI:2449307]	Down	-2.7819	7.60605	6539.2	1438.83	3.85176e-19	4.317e-16
Brd4	bromodomain containing 4 [Source:MGI Symbol;Acc:MGI:1888520]	Down	-2.39123	9.02829	16351.6	4916.67	4.67261e-19	4.88786e-16
Cwf19l2	CWF19-like 2, cell cycle control (S. pombe) [Source:MGI Symbol;Acc:MGI:1918023]	Down	-2.94703	6.9864	4035.2	840.333	2.58851e-18	2.53852e-15
Slc1a5	solute carrier family 1 (neutral amino acid transporter), member 5 [Source:MGI Symbol;Acc:MGI:105305]	Up	2.15017	7.43268	1056.8	7746	2.78849e-18	2.57378e-15
Rbm25	RNA binding motif protein 25 [Source:MGI Symbol;Acc:MGI:1914289]	Down	-2.23238	9.45105	21467.4	7094.17	3.02204e-18	2.63438e-15
Luc7l3	LUC7-like 3 (S. cerevisiae) [Source:MGI Symbol;Acc:MGI:1914934]	Down	-2.20414	10.0857	33498.8	11401.8	7.10292e-18	5.86589e-15
Med19	mediator complex subunit 19 [Source:MGI Symbol;Acc:MGI:1914234]	Down	-2.33534	6.61209	2994	975.167	4.03048e-17	3.16212e-14
Selenop	selenoprotein P [Source:MGI Symbol;Acc:MGI:894288]	Down	-2.567	7.92154	7694.8	2182.5	2.36778e-16	1.76919e-13
Sectm1b	secreted and transmembrane 1B [Source:MGI Symbol;Acc:MGI:1929083]	Down	-2.04862	7.48903	5235	2101	4.24873e-16	3.03031e-13
Pigr	polymeric immunoglobulin receptor [Source:MGI Symbol;Acc:MGI:103080]	Up	1.46334	12.1682	40413.2	193691	1.35252e-15	9.22712e-13
Usf2	upstream transcription factor 2 [Source:MGI Symbol;Acc:MGI:99961]	Down	-2.17649	7.41883	5102.4	1884.17	1.4142e-15	9.24595e-13
Naa15	N(alpha)-acetyltransferase 15, NatA auxiliary subunit [Source:MGI Symbol;Acc:MGI:1922088]	Down	-2.0959	8.06098	8281	3025.67	2.21636e-15	1.39107e-12
Hoxa11os	homeobox A11, opposite strand [Source:MGI Symbol;Acc:MGI:107208]	Up	3.44487	6.25015	222.2	4017.17	3.58492e-15	2.1635e-12
Gm41804	predicted gene, 41804 [Source:MGI Symbol;Acc:MGI:5624689]	Up	12.0917	3.65767	0	641	5.36718e-15	3.11912e-12
Pnisr	PNN interacting serine/arginine-rich [Source:MGI Symbol;Acc:MGI:1913875]	Down	-2.19162	7.38919	4957.4	1771.5	7.06755e-15	3.96061e-12
9530053A07Rik	RIKEN cDNA 9530053A07 gene [Source:MGI Symbol;Acc:MGI:2442118]	Up	11.8379	5.1898	0.2	2145.5	1.29071e-14	6.98364e-12
Rrp12	ribosomal RNA processing 12 homolog [Source:MGI Symbol;Acc:MGI:2147437]	Up	11.993	3.55965	0	579.833	3.17401e-14	1.66011e-11
Ankhd1	ankyrin repeat and KH domain containing 1 [Source:MGI Symbol;Acc:MGI:1921733]	Down	-2.36109	8.05637	8779	2670.83	5.18355e-14	2.62371e-11
1810037I17Rik	RIKEN cDNA 1810037I17 gene [Source:MGI Symbol;Acc:MGI:1914954]	Down	-1.82223	7.69093	5642	2930.5	5.68018e-14	2.78524e-11
Ctnnb1	catenin (cadherin associated protein), beta 1 [Source:MGI Symbol;Acc:MGI:88276]	Down	-1.68359	9.8779	26508.2	13110.5	6.01471e-14	2.8599e-11
Tsen54	tRNA splicing endonuclease subunit 54 [Source:MGI Symbol;Acc:MGI:1923515]	Up	11.8437	3.41157	0	597.333	1.58065e-13	7.29469e-11
Snhg17	small nucleolar RNA host gene 17 [Source:MGI Symbol;Acc:MGI:1915358]	Up	11.7376	3.30638	0	515.333	3.28219e-13	1.47145e-10
Cyb5a	cytochrome b5 type A (microsomal) [Source:MGI Symbol;Acc:MGI:1926952]	Down	-1.5992	7.35108	4482.8	2452.17	5.48396e-13	2.39025e-10
Ccdc25	coiled-coil domain containing 25 [Source:MGI Symbol;Acc:MGI:1914429]	Down	-2.14449	6.83987	3194	1228.83	6.88476e-13	2.9197e-10
Sprr2a3	small proline-rich protein 2A3 [Source:MGI Symbol;Acc:MGI:3845028]	Down	-1.94684	8.26224	9251.6	3787.67	7.43175e-13	3.06873e-10
Tspyl2	TSPY-like 2 [Source:MGI Symbol;Acc:MGI:106244]	Up	11.7547	3.32329	0	508.5	7.88395e-13	3.17198e-10
Hoxa5	homeobox A5 [Source:MGI Symbol;Acc:MGI:96177]	Up	11.7235	3.29241	0	523.667	8.58214e-13	3.36656e-10
Ttr	transthyretin [Source:MGI Symbol;Acc:MGI:98865]	Up	12.4825	4.04616	0	1118	8.83757e-13	3.3822e-10
Clec2h	C-type lectin domain family 2, member h [Source:MGI Symbol;Acc:MGI:2136934]	Down	-1.69921	8.13692	7579.6	4289	9.89137e-13	3.69537e-10
Safb2	scaffold attachment factor B2 [Source:MGI Symbol;Acc:MGI:2146808]	Up	2.22524	7.22718	835	6569.17	1.10366e-12	4.02733e-10
Stx7	syntaxin 7 [Source:MGI Symbol;Acc:MGI:1858210]	Down	-1.81468	6.71627	3026	1456.5	1.20318e-12	4.29069e-10
Naa16	N(alpha)-acetyltransferase 16, NatA auxiliary subunit [Source:MGI Symbol;Acc:MGI:1914147]	Down	-3.11182	5.56875	1620.6	287.5	1.26936e-12	4.42495e-10
Mark2	MAP/microtubule affinity regulating kinase 2 [Source:MGI Symbol;Acc:MGI:99638]	Down	-1.81594	8.71133	11465.8	5544.33	1.29723e-12	4.42495e-10
Slc40a1	solute carrier family 40 (iron-regulated transporter), member 1 [Source:MGI Symbol;Acc:MGI:1315204]	Down	-2.81424	6.20934	2506.8	560.333	1.45351e-12	4.85257e-10
Gm51702	#N/A	Up	11.6941	3.26327	0	473.833	1.59692e-12	5.12827e-10
Sema4g	sema domain, immunoglobulin domain (Ig), transmembrane domain (TM) and short cytoplasmic domain, (semaphorin) 4G [Source:MGI Symbol;Acc:MGI:1347047]	Up	1.91981	8.1058	1864.2	12592.3	1.60146e-12	5.12827e-10
Espn	espin [Source:MGI Symbol;Acc:MGI:1861630]	Down	-1.81709	8.04841	7256	3481.33	1.70238e-12	5.2983e-10
Nmt1	N-myristoyltransferase 1 [Source:MGI Symbol;Acc:MGI:102579]	Down	-1.6611	8.29482	8759	4408.33	1.72209e-12	5.2983e-10
Ddx39b	DEAD box helicase 39b [Source:MGI Symbol;Acc:MGI:99240]	Up	2.0141	7.24736	993.6	6796.5	1.97061e-12	5.94632e-10
Sned1	sushi, nidogen and EGF-like domains 1 [Source:MGI Symbol;Acc:MGI:3045960]	Up	11.7414	3.31016	0	579.167	2.09274e-12	6.19568e-10
Nsrp1	nuclear speckle regulatory protein 1 [Source:MGI Symbol;Acc:MGI:2144305]	Down	-1.9338	7.70353	6279.2	2529.67	2.79516e-12	8.122e-10
Rbbp6	retinoblastoma binding protein 6, ubiquitin ligase [Source:MGI Symbol;Acc:MGI:894835]	Down	-1.94827	7.07092	3704.4	1629.83	3.44249e-12	9.82112e-10
Plk2	polo like kinase 2 [Source:MGI Symbol;Acc:MGI:1099790]	Up	9.50636	3.36523	0.4	556.5	7.11622e-12	1.99394e-09
Lime1	Lck interacting transmembrane adaptor 1 [Source:MGI Symbol;Acc:MGI:1919949]	Up	11.5374	3.10807	0	443.667	7.95414e-12	2.18962e-09
Gm46594	#N/A	Up	11.6574	3.22687	0	468.833	1.01982e-11	2.75896e-09
Rhbdl1	rhomboid like 1 [Source:MGI Symbol;Acc:MGI:2384891]	Up	11.4836	3.05485	0	437.833	1.09311e-11	2.88768e-09
LOC118567497	#N/A	Down	-4.90847	4.35132	685.4	41.5	1.10421e-11	2.88768e-09
Pcdh17	protocadherin 17 [Source:MGI Symbol;Acc:MGI:2684924]	Up	11.5049	3.07589	0	452	1.2224e-11	3.14438e-09
Tbc1d24	TBC1 domain family, member 24 [Source:MGI Symbol;Acc:MGI:2443456]	Up	8.9254	3.33379	0.6	582.667	1.38701e-11	3.46977e-09
Ddrgk1	DDRGK domain containing 1 [Source:MGI Symbol;Acc:MGI:1924256]	Up	1.7963	7.73671	1605.4	9335.83	1.39313e-11	3.46977e-09
Scgb1b3	secretoglobin, family 1B, member 3 [Source:MGI Symbol;Acc:MGI:3644233]	Up	11.4881	3.05937	0	433.5	1.47012e-11	3.60433e-09
Pcsk4	proprotein convertase subtilisin/kexin type 4 [Source:MGI Symbol;Acc:MGI:97514]	Up	11.3605	2.93314	0	414.167	1.61759e-11	3.90487e-09
Doc2g	double C2, gamma [Source:MGI Symbol;Acc:MGI:1926250]	Up	11.3633	2.93593	0	407	1.8314e-11	4.35401e-09
Rrnad1	ribosomal RNA adenine dimethylase domain containing 1 [Source:MGI Symbol;Acc:MGI:2387197]	Up	11.3627	2.9353	0	385.833	2.23174e-11	5.22659e-09
Rhoc	ras homolog family member C [Source:MGI Symbol;Acc:MGI:106028]	Down	-1.54524	7.45638	4801.4	2746.33	2.66321e-11	6.14537e-09
Ankrd24	ankyrin repeat domain 24 [Source:MGI Symbol;Acc:MGI:1890394]	Up	11.3056	2.87894	0	405.333	2.75376e-11	6.24436e-09
Dennd3	DENN/MADD domain containing 3 [Source:MGI Symbol;Acc:MGI:2146009]	Up	11.2891	2.86261	0	397	2.79009e-11	6.24436e-09
Snord3b3	small nucleolar RNA, C/D box 3B3 [Source:MGI Symbol;Acc:MGI:97987]	Down	-2.97227	6.67893	3095.2	744.5	2.8255e-11	6.24436e-09
Oit1	#N/A	Up	1.34952	10.8937	17646.8	80136.8	3.02887e-11	6.60082e-09
Sumo2	small ubiquitin-like modifier 2 [Source:MGI Symbol;Acc:MGI:2158813]	Down	-1.67778	6.57401	2646.4	1434.33	3.18918e-11	6.81769e-09
Larp1	La ribonucleoprotein 1, translational regulator [Source:MGI Symbol;Acc:MGI:1890165]	Up	1.57844	7.53929	1461.6	7755.67	3.2345e-11	6.81769e-09
Pcyt2	phosphate cytidylyltransferase 2, ethanolamine [Source:MGI Symbol;Acc:MGI:1915921]	Up	1.83224	7.11516	944.4	5823	3.25872e-11	6.81769e-09
Gm40078	#N/A	Up	11.3646	2.9371	0	375.667	3.70649e-11	7.65243e-09
Ybx1	Y box protein 1 [Source:MGI Symbol;Acc:MGI:99146]	Down	-1.2457	10.6651	42408.6	28981.5	4.7782e-11	9.73699e-09
A930013F10Rik	#N/A	Up	11.3927	2.9649	0	386.167	6.09946e-11	1.22701e-08
Snhg16	small nucleolar RNA host gene 16 [Source:MGI Symbol;Acc:MGI:1913543]	Up	11.198	2.77265	0	358.833	6.64262e-11	1.31936e-08
Abcc6	ATP-binding cassette, sub-family C (CFTR/MRP), member 6 [Source:MGI Symbol;Acc:MGI:1351634]	Up	11.1806	2.75544	0	370.333	9.0082e-11	1.76684e-08
Gm13648	predicted gene 13648 [Source:MGI Symbol;Acc:MGI:3652033]	Up	11.2489	2.82286	0	354.833	9.38452e-11	1.81793e-08
Kmt2c	lysine (K)-specific methyltransferase 2C [Source:MGI Symbol;Acc:MGI:2444959]	Down	-2.14104	6.53567	2712.4	980.5	1.02465e-10	1.9607e-08
Gm31109	#N/A	Up	11.3308	2.90368	0	346.833	1.0957e-10	2.07141e-08
Gm51534	#N/A	Up	11.0657	2.6422	0	348	1.34576e-10	2.51385e-08
Gm20379	predicted gene, 20379 [Source:MGI Symbol;Acc:MGI:5012564]	Up	11.1003	2.67621	0	328.167	1.42314e-10	2.62712e-08
Sycn	syncollin [Source:MGI Symbol;Acc:MGI:1915666]	Up	5.99307	9.22374	325.2	37383	1.46466e-10	2.67232e-08
Tti1	TELO2 interacting protein 1 [Source:MGI Symbol;Acc:MGI:1922675]	Up	11.062	2.63851	0	341.333	1.48756e-10	2.6829e-08
0610040F04Rik	RIKEN cDNA 0610040F04 gene [Source:MGI Symbol;Acc:MGI:1922644]	Up	11.5891	3.15918	0	416.333	1.66138e-10	2.96235e-08
C130074G19Rik	RIKEN cDNA C130074G19 gene [Source:MGI Symbol;Acc:MGI:2444831]	Down	-1.86765	5.96544	1785.6	851.667	2.12322e-10	3.7433e-08
Dync1h1	dynein cytoplasmic 1 heavy chain 1 [Source:MGI Symbol;Acc:MGI:103147]	Up	1.54746	7.3533	1382	6781.67	2.27619e-10	3.96842e-08
Zfp956	zinc finger protein 956 [Source:MGI Symbol;Acc:MGI:2141515]	Up	11.1542	2.72948	0	371.5	2.49872e-10	4.3085e-08
Svs4	seminal vesicle secretory protein 4 [Source:MGI Symbol;Acc:MGI:98450]	Up	13.6057	5.16521	0	2879.67	2.54714e-10	4.34426e-08
Sltm	SAFB-like, transcription modulator [Source:MGI Symbol;Acc:MGI:1913910]	Down	-1.52503	7.98369	6968.8	3794.33	2.64601e-10	4.46435e-08
Hpgd	hydroxyprostaglandin dehydrogenase 15 (NAD) [Source:MGI Symbol;Acc:MGI:108085]	Down	-1.72386	7.47902	4957.8	2629	2.75906e-10	4.60558e-08
Col20a1	collagen, type XX, alpha 1 [Source:MGI Symbol;Acc:MGI:1920618]	Up	11.1358	2.71125	0	322.167	3.06446e-10	5.02403e-08
Slc50a1	solute carrier family 50 (sugar transporter), member 1 [Source:MGI Symbol;Acc:MGI:107417]	Up	1.99474	6.43447	592.6	3991.5	3.07901e-10	5.02403e-08
Mir6946	microRNA 6946 [Source:MGI Symbol;Acc:MGI:5531181]	Down	-8.75334	3.80204	440.4	1.83333	3.1058e-10	5.02403e-08
Sox9	SRY (sex determining region Y)-box 9 [Source:MGI Symbol;Acc:MGI:98371]	Up	2.1426	7.64232	1251.4	8977.17	3.19129e-10	5.10965e-08
Calm2	calmodulin 2 [Source:MGI Symbol;Acc:MGI:103250]	Down	-1.3066	8.8537	11928.8	8136	3.78014e-10	5.99133e-08
Ino80	INO80 complex subunit [Source:MGI Symbol;Acc:MGI:1915392]	Down	-2.51613	6.1347	2101.8	620.833	3.85185e-10	6.00009e-08
Gm31774	predicted gene, 31774 [Source:MGI Symbol;Acc:MGI:5590933]	Up	11.3179	2.8909	0	342.667	3.86214e-10	6.00009e-08
Man2a2	mannosidase 2, alpha 2 [Source:MGI Symbol;Acc:MGI:2150656]	Up	10.9986	2.57594	0	302.5	4.00554e-10	6.12702e-08
Tnrc6b	trinucleotide repeat containing 6b [Source:MGI Symbol;Acc:MGI:2443730]	Down	-2.05859	5.96988	1892.4	757.5	4.02195e-10	6.12702e-08
Azin1	antizyme inhibitor 1 [Source:MGI Symbol;Acc:MGI:1859169]	Down	-1.63179	6.9203	3286.6	1760.83	4.13171e-10	6.23371e-08
Snhg15	small nucleolar RNA host gene 15 [Source:MGI Symbol;Acc:MGI:3650059]	Up	10.8846	2.46382	0	290.333	4.18033e-10	6.24701e-08
Pear1	platelet endothelial aggregation receptor 1 [Source:MGI Symbol;Acc:MGI:1920432]	Up	10.9444	2.52275	0	320.5	5.01022e-10	7.41655e-08
B4galnt2	beta-1,4-N-acetyl-galactosaminyl transferase 2 [Source:MGI Symbol;Acc:MGI:1342058]	Down	-2.33628	11.2336	74746	22904.2	5.33867e-10	7.82889e-08
Hic2	hypermethylated in cancer 2 [Source:MGI Symbol;Acc:MGI:1929869]	Up	10.9988	2.5761	0	288.833	5.6662e-10	8.23225e-08
Ang4	angiogenin, ribonuclease A family, member 4 [Source:MGI Symbol;Acc:MGI:2656551]	Down	-4.83729	7.66251	7292.6	498.667	5.7927e-10	8.33883e-08
Irf7	interferon regulatory factor 7 [Source:MGI Symbol;Acc:MGI:1859212]	Down	-2.14607	7.75558	6249.6	2280.83	6.05419e-10	8.63602e-08
B3gnt7	UDP-GlcNAc:betaGal beta-1,3-N-acetylglucosaminyltransferase 7 [Source:MGI Symbol;Acc:MGI:2384394]	Up	3.62953	7.51846	402.4	11114.7	6.16481e-10	8.7146e-08
Slc39a13	solute carrier family 39 (metal ion transporter), member 13 [Source:MGI Symbol;Acc:MGI:1915677]	Up	10.9363	2.51473	0	298	6.27295e-10	8.78829e-08
Krt20	keratin 20 [Source:MGI Symbol;Acc:MGI:1914059]	Down	-1.93127	8.74457	12524.6	4995.83	6.95156e-10	9.65283e-08
Arpc5	actin related protein 2/3 complex, subunit 5 [Source:MGI Symbol;Acc:MGI:1915021]	Down	-1.21161	7.75811	5441.2	3990.83	7.16525e-10	9.86228e-08
Svs5	seminal vesicle secretory protein 5 [Source:MGI Symbol;Acc:MGI:98453]	Up	13.5605	5.12011	0	2785.83	7.82512e-10	1.0607e-07
Dcp1a	decapping mRNA 1A [Source:MGI Symbol;Acc:MGI:1923151]	Up	10.9336	2.51203	0	309.167	7.84154e-10	1.0607e-07
Ttll3	tubulin tyrosine ligase-like family, member 3 [Source:MGI Symbol;Acc:MGI:2141418]	Up	11.0538	2.63036	0	301.333	8.0275e-10	1.07658e-07
LOC118568531	#N/A	Up	11.025	2.60194	0	302.667	1.12153e-09	1.49134e-07
Exog	endo/exonuclease (5'-3'), endonuclease G-like [Source:MGI Symbol;Acc:MGI:2143333]	Up	10.8174	2.3976	0	276.333	1.17082e-09	1.54381e-07
Gramd3	GRAM domain containing 3 [Source:MGI Symbol;Acc:MGI:1914815]	Down	-2.00362	6.3846	2546.4	984.167	1.18253e-09	1.54625e-07
Tspan5	tetraspanin 5 [Source:MGI Symbol;Acc:MGI:1928096]	Up	10.9349	2.51345	0	334.333	1.2606e-09	1.63472e-07
Tmc4	transmembrane channel-like gene family 4 [Source:MGI Symbol;Acc:MGI:2669035]	Up	1.47146	7.42794	1577.2	7304.67	1.35592e-09	1.74392e-07
B4galnt4	beta-1,4-N-acetyl-galactosaminyl transferase 4 [Source:MGI Symbol;Acc:MGI:2652891]	Up	10.8067	2.38713	0	268.667	1.36975e-09	1.74738e-07
Btnl6	butyrophilin-like 6 [Source:MGI Symbol;Acc:MGI:1932038]	Down	-2.5842	5.50138	1359.2	391.5	1.42412e-09	1.80209e-07
Rabl6	RAB, member RAS oncogene family-like 6 [Source:MGI Symbol;Acc:MGI:2442633]	Down	-1.3258	7.73938	5395	3587.17	1.53997e-09	1.9331e-07
Vwf	Von Willebrand factor [Source:MGI Symbol;Acc:MGI:98941]	Up	10.7218	2.30371	0	251	1.68084e-09	2.09318e-07
Gm13594	predicted gene 13594 [Source:MGI Symbol;Acc:MGI:3702953]	Up	10.7498	2.33125	0	260	1.7121e-09	2.11532e-07
Meg3	maternally expressed 3 [Source:MGI Symbol;Acc:MGI:1202886]	Down	-8.38601	6.34496	2769	15	2.14574e-09	2.62811e-07
Hid1	HID1 domain containing [Source:MGI Symbol;Acc:MGI:2445087]	Up	1.75684	6.88133	882	5410.33	2.16064e-09	2.62811e-07
Klk1	kallikrein 1 [Source:MGI Symbol;Acc:MGI:102850]	Up	1.61049	11.2352	19339.6	108877	2.24477e-09	2.70944e-07
Atp2b1	ATPase, Ca++ transporting, plasma membrane 1 [Source:MGI Symbol;Acc:MGI:104653]	Down	-1.48762	7.68179	5218.4	3107.5	2.45562e-09	2.94131e-07
Mknk1	MAP kinase-interacting serine/threonine kinase 1 [Source:MGI Symbol;Acc:MGI:894316]	Up	10.6819	2.26462	0	253.5	2.52797e-09	2.98863e-07
Cmpk1	cytidine monophosphate (UMP-CMP) kinase 1 [Source:MGI Symbol;Acc:MGI:1913838]	Down	-1.26981	8.97387	12457.4	8974.5	2.53322e-09	2.98863e-07
Ccne1	cyclin E1 [Source:MGI Symbol;Acc:MGI:88316]	Up	10.6608	2.24382	0	239.167	2.60573e-09	3.05123e-07
Cabcoco1	ciliary associated calcium binding coiled-coil 1 [Source:MGI Symbol;Acc:MGI:1920537]	Up	10.7266	2.30846	0	262.833	2.9325e-09	3.40843e-07
Met	met proto-oncogene [Source:MGI Symbol;Acc:MGI:96969]	Up	10.8844	2.46338	0	261.167	2.96343e-09	3.41906e-07
Arf1	ADP-ribosylation factor 1 [Source:MGI Symbol;Acc:MGI:99431]	Down	-1.31748	8.7362	11095.2	7392.33	3.09102e-09	3.54024e-07
Slx4	SLX4 structure-specific endonuclease subunit homolog (S. cerevisiae) [Source:MGI Symbol;Acc:MGI:106299]	Up	10.6838	2.26642	0	239.833	3.25167e-09	3.6784e-07
Rfk	riboflavin kinase [Source:MGI Symbol;Acc:MGI:1914688]	Down	-1.40509	9.03492	13460.2	8355.5	3.25854e-09	3.6784e-07
Pard3b	par-3 family cell polarity regulator beta [Source:MGI Symbol;Acc:MGI:1919301]	Down	-2.32321	5.96457	1983	609.5	3.30596e-09	3.6878e-07
Npat	nuclear protein in the AT region [Source:MGI Symbol;Acc:MGI:107605]	Up	10.7121	2.29406	0	238.833	3.31387e-09	3.6878e-07
Ddx28	DEAD box helicase 28 [Source:MGI Symbol;Acc:MGI:1919236]	Up	10.5821	2.16668	0	235.167	3.37648e-09	3.73101e-07
St6galnac2	ST6 (alpha-N-acetyl-neuraminyl-2,3-beta-galactosyl-1,3)-N-acetylgalactosaminide alpha-2,6-sialyltransferase 2 [Source:MGI Symbol;Acc:MGI:107553]	Up	1.61756	6.33763	672.4	3325	3.41378e-09	3.74585e-07
Mep1a	meprin 1 alpha [Source:MGI Symbol;Acc:MGI:96963]	Down	-1.40876	7.07962	3467.2	2191.67	3.48423e-09	3.7966e-07
Zfp428	zinc finger protein 428 [Source:MGI Symbol;Acc:MGI:1916463]	Up	10.6269	2.21058	0	241.333	3.54664e-09	3.83795e-07
Klhdc7a	kelch domain containing 7A [Source:MGI Symbol;Acc:MGI:2444612]	Up	10.7771	2.35805	0	266.667	3.75065e-09	4.03092e-07
2210039B01Rik	RIKEN cDNA 2210039B01 gene [Source:MGI Symbol;Acc:MGI:1920894]	Up	10.6981	2.28053	0	269.5	3.99955e-09	4.26918e-07
Zscan12	zinc finger and SCAN domain containing 12 [Source:MGI Symbol;Acc:MGI:1099444]	Up	10.6193	2.20325	0	259.167	4.06648e-09	4.31129e-07
Plk1	polo like kinase 1 [Source:MGI Symbol;Acc:MGI:97621]	Up	2.12715	6.50958	614.6	3960.83	4.20874e-09	4.42254e-07
Rgs11	regulator of G-protein signaling 11 [Source:MGI Symbol;Acc:MGI:1354739]	Up	10.8187	2.39889	0	260.833	4.24119e-09	4.42254e-07
Sdcbp	syndecan binding protein [Source:MGI Symbol;Acc:MGI:1337026]	Down	-1.63337	7.37537	4465	2460.5	4.25596e-09	4.42254e-07
Wfdc2	WAP four-disulfide core domain 2 [Source:MGI Symbol;Acc:MGI:1914951]	Up	2.4415	8.4939	1752	19801.3	5.23448e-09	5.40357e-07
Ncmap	noncompact myelin associated protein [Source:MGI Symbol;Acc:MGI:2444888]	Up	10.7812	2.36186	0	249.167	5.43958e-09	5.57859e-07
Tacc1	transforming, acidic coiled-coil containing protein 1 [Source:MGI Symbol;Acc:MGI:2443510]	Up	10.8926	2.47143	0	255.167	5.53998e-09	5.63396e-07
Pla2g4f	phospholipase A2, group IVF [Source:MGI Symbol;Acc:MGI:2685493]	Up	10.7493	2.3308	0	285.167	5.56538e-09	5.63396e-07
Dnah8	dynein, axonemal, heavy chain 8 [Source:MGI Symbol;Acc:MGI:107714]	Up	10.6962	2.27857	0	257.167	6.46105e-09	6.49874e-07
Syngr1	synaptogyrin 1 [Source:MGI Symbol;Acc:MGI:1328323]	Up	10.7173	2.29929	0	263	6.57325e-09	6.56949e-07
Iqgap1	IQ motif containing GTPase activating protein 1 [Source:MGI Symbol;Acc:MGI:1352757]	Down	-1.67591	8.99772	13207	7696.5	6.94829e-09	6.90035e-07
LOC118568744	#N/A	Up	10.7011	2.28319	0	234.5	7.59592e-09	7.49505e-07
Ptpn18	protein tyrosine phosphatase, non-receptor type 18 [Source:MGI Symbol;Acc:MGI:108410]	Up	2.15769	6.73907	631.8	4821.33	7.64265e-09	7.49505e-07
Tmed3	transmembrane p24 trafficking protein 3 [Source:MGI Symbol;Acc:MGI:1913361]	Up	1.55209	7.3621	1422.2	7061.83	8.44609e-09	8.21669e-07
Alg1	asparagine-linked glycosylation 1 (beta-1,4-mannosyltransferase) [Source:MGI Symbol;Acc:MGI:2384774]	Up	9.14592	2.30649	0.2	258.667	8.48324e-09	8.21669e-07
Gm51770	#N/A	Up	8.29068	3.43057	1	561.5	9.48058e-09	9.12637e-07
Ppp4r1l-ps	protein phosphatase 4, regulatory subunit 1-like, pseudogene [Source:NCBI gene (formerly Entrezgene);Acc:100043911]	Up	10.747	2.32823	0	231.833	1.04409e-08	9.93391e-07
Slc6a4	solute carrier family 6 (neurotransmitter transporter, serotonin), member 4 [Source:MGI Symbol;Acc:MGI:96285]	Up	10.7334	2.31521	0	289	1.04461e-08	9.93391e-07
Gm12701	predicted gene 12701 [Source:MGI Symbol;Acc:MGI:3650875]	Up	10.7964	2.3773	0	309.333	1.10307e-08	1.04051e-06
Pou6f1	POU domain, class 6, transcription factor 1 [Source:MGI Symbol;Acc:MGI:102935]	Up	10.5941	2.17827	0	217.667	1.10742e-08	1.04051e-06
Lrig2	leucine-rich repeats and immunoglobulin-like domains 2 [Source:MGI Symbol;Acc:MGI:2443718]	Up	10.5708	2.15581	0	259	1.15614e-08	1.07982e-06
Hoga1	4-hydroxy-2-oxoglutarate aldolase 1 [Source:MGI Symbol;Acc:MGI:1914682]	Up	10.5482	2.13351	0	235.167	1.16378e-08	1.08053e-06
Prrc2c	proline-rich coiled-coil 2C [Source:MGI Symbol;Acc:MGI:1913754]	Down	-1.46948	6.9976	3300.8	1985.17	1.23391e-08	1.13393e-06
Prr3	proline-rich polypeptide 3 [Source:MGI Symbol;Acc:MGI:1922460]	Up	10.3845	1.97324	0	206	1.23575e-08	1.13393e-06
Nemp2	nuclear envelope integral membrane protein 2 [Source:MGI Symbol;Acc:MGI:2444113]	Up	10.657	2.24022	0	266.667	1.25757e-08	1.14724e-06
Gm41756	#N/A	Up	7.47577	3.70312	2	665.333	1.36348e-08	1.23667e-06
Bambi	BMP and activin membrane-bound inhibitor [Source:MGI Symbol;Acc:MGI:1915260]	Up	10.48	2.06665	0	220.833	1.41626e-08	1.27715e-06
Smpx	small muscle protein, X-linked [Source:MGI Symbol;Acc:MGI:1913356]	Up	10.9672	2.5455	0	381.333	1.44752e-08	1.29788e-06
Gm11735	predicted gene 11735 [Source:MGI Symbol;Acc:MGI:3713525]	Up	10.5116	2.09765	0	239.5	1.49919e-08	1.33633e-06
P2rx4	purinergic receptor P2X, ligand-gated ion channel 4 [Source:MGI Symbol;Acc:MGI:1338859]	Up	1.41706	7.47397	1540.6	7188	1.50766e-08	1.33633e-06
Sprr1a	small proline-rich protein 1A [Source:MGI Symbol;Acc:MGI:106660]	Down	-3.61007	5.07238	1260	153.167	1.51594e-08	1.33633e-06
Fzd9	frizzled class receptor 9 [Source:MGI Symbol;Acc:MGI:1313278]	Up	10.4535	2.0407	0	212.667	1.52628e-08	1.33793e-06
Hoxd4	homeobox D4 [Source:MGI Symbol;Acc:MGI:96208]	Up	11.0935	2.66944	0	302.667	1.5714e-08	1.36542e-06
Sox6	SRY (sex determining region Y)-box 6 [Source:MGI Symbol;Acc:MGI:98368]	Up	10.4612	2.04812	0	202.5	1.57505e-08	1.36542e-06
Brf1	BRF1, RNA polymerase III transcription initiation factor 90 kDa subunit [Source:MGI Symbol;Acc:MGI:1919558]	Up	2.28767	5.77188	291	2475.83	1.61314e-08	1.39076e-06
Cox6a1	cytochrome c oxidase subunit 6A1 [Source:MGI Symbol;Acc:MGI:103099]	Up	1.11334	9.27188	6541.2	24711.8	1.8773e-08	1.60966e-06
LOC118568353	#N/A	Up	8.35644	2.42185	0.4	274.5	2.02523e-08	1.72706e-06
8430429K09Rik	RIKEN cDNA 8430429K09 gene [Source:MGI Symbol;Acc:MGI:1918773]	Up	10.3904	1.97906	0	204.167	2.03926e-08	1.72962e-06
Mxd1	MAX dimerization protein 1 [Source:MGI Symbol;Acc:MGI:96908]	Down	-1.91099	7.68502	6114.6	2503	2.2818e-08	1.92493e-06
Plac8	placenta-specific 8 [Source:MGI Symbol;Acc:MGI:2445289]	Down	-1.26915	9.03598	12951	9943	2.35109e-08	1.97072e-06
Haus6	HAUS augmin-like complex, subunit 6 [Source:MGI Symbol;Acc:MGI:1923389]	Up	10.4691	2.05579	0	209.667	2.36119e-08	1.97072e-06
Tmem35b	transmembrane protein 35B [Source:MGI Symbol;Acc:MGI:3758095]	Up	10.4305	2.01851	0	237.333	2.51574e-08	2.08312e-06
Net1	neuroepithelial cell transforming gene 1 [Source:MGI Symbol;Acc:MGI:1927138]	Down	-1.11266	8.49709	8942.6	6812.17	2.52862e-08	2.08312e-06
Nfib	nuclear factor I/B [Source:MGI Symbol;Acc:MGI:103188]	Up	3.00559	6.2802	310.6	3802.33	2.53569e-08	2.08312e-06
Tgfbr3l	transforming growth factor, beta receptor III-like [Source:MGI Symbol;Acc:MGI:3833469]	Up	10.7172	2.29908	0	240.333	2.66004e-08	2.17389e-06
Zmym6	zinc finger, MYM-type 6 [Source:MGI Symbol;Acc:MGI:106505]	Up	10.3773	1.96601	0	194.667	2.70096e-08	2.19589e-06
A530020G20Rik	RIKEN cDNA A530020G20 gene [Source:MGI Symbol;Acc:MGI:2442825]	Up	10.3186	1.90903	0	211.667	2.82562e-08	2.27439e-06
Brip1	BRCA1 interacting protein C-terminal helicase 1 [Source:MGI Symbol;Acc:MGI:2442836]	Up	10.3508	1.94054	0	219.5	2.82651e-08	2.27439e-06
Uggt1	UDP-glucose glycoprotein glucosyltransferase 1 [Source:MGI Symbol;Acc:MGI:2443162]	Up	2.04283	6.13316	459.8	3117.5	2.90321e-08	2.30134e-06
Sult1d1	sulfotransferase family 1D, member 1 [Source:MGI Symbol;Acc:MGI:1926341]	Down	-1.54724	7.97257	6954.2	3709.67	2.91032e-08	2.30134e-06
Gm52385	#N/A	Up	10.3995	1.98769	0	192.333	2.91464e-08	2.30134e-06
Slc26a11	solute carrier family 26, member 11 [Source:MGI Symbol;Acc:MGI:2444589]	Up	10.2652	1.85681	0	194.667	2.91866e-08	2.30134e-06
Urb1	URB1 ribosome biogenesis 1 homolog (S. cerevisiae) [Source:MGI Symbol;Acc:MGI:2146468]	Up	10.3469	1.93676	0	217.667	3.04787e-08	2.39121e-06
Gpx3	glutathione peroxidase 3 [Source:MGI Symbol;Acc:MGI:105102]	Up	10.4349	2.02288	0	247	3.06399e-08	2.39189e-06
Csrnp2	cysteine-serine-rich nuclear protein 2 [Source:MGI Symbol;Acc:MGI:2386852]	Up	10.3568	1.94625	0	213.333	3.11026e-08	2.41599e-06
Itpkb	inositol 1,4,5-trisphosphate 3-kinase B [Source:MGI Symbol;Acc:MGI:109235]	Up	10.3093	1.89982	0	203.5	3.15319e-08	2.43727e-06
Accs	1-aminocyclopropane-1-carboxylate synthase (non-functional) [Source:MGI Symbol;Acc:MGI:1919717]	Up	10.2428	1.83504	0	199.167	3.18326e-08	2.44846e-06
LOC118567918	#N/A	Up	10.5127	2.09857	0	211	3.24921e-08	2.48699e-06
Nlrp9b	NLR family, pyrin domain containing 9B [Source:MGI Symbol;Acc:MGI:2675377]	Up	10.6006	2.18456	0	213.667	3.36384e-08	2.55074e-06
Rgs12	regulator of G-protein signaling 12 [Source:MGI Symbol;Acc:MGI:1918979]	Up	10.2102	1.80305	0	175.167	3.36501e-08	2.55074e-06
Dip2c	disco interacting protein 2 homolog C [Source:MGI Symbol;Acc:MGI:1920179]	Up	10.4406	2.02802	0	207.167	3.43054e-08	2.58791e-06
Atp9a	ATPase, class II, type 9A [Source:MGI Symbol;Acc:MGI:1330826]	Up	1.54026	7.97369	2041.4	10685.3	3.52652e-08	2.64759e-06
Psrc1	proline/serine-rich coiled-coil 1 [Source:MGI Symbol;Acc:MGI:1913099]	Up	10.4209	2.0087	0	197.5	3.56543e-08	2.66405e-06
Pot1b	protection of telomeres 1B [Source:MGI Symbol;Acc:MGI:1920086]	Up	10.0975	1.69334	0	163.5	3.73851e-08	2.78014e-06
Ice2	interactor of little elongation complex ELL subunit 2 [Source:MGI Symbol;Acc:MGI:2135947]	Up	10.3163	1.90679	0	209	3.77511e-08	2.79411e-06
Zcchc17	zinc finger, CCHC domain containing 17 [Source:MGI Symbol;Acc:MGI:1919955]	Down	-1.67951	6.7714	3325.2	1590.33	3.79691e-08	2.79705e-06
Obscn	obscurin, cytoskeletal calmodulin and titin-interacting RhoGEF [Source:MGI Symbol;Acc:MGI:2681862]	Up	10.4069	1.99489	0	188.667	3.84467e-08	2.81901e-06
Actg1	actin, gamma, cytoplasmic 1 [Source:MGI Symbol;Acc:MGI:87906]	Down	-0.950888	10.1142	25842.2	22724.8	3.97248e-08	2.87794e-06
Sec62	SEC62 homolog (S. cerevisiae) [Source:MGI Symbol;Acc:MGI:1916526]	Up	1.44576	7.42668	1450.6	7076.5	3.97585e-08	2.87794e-06
Tle2	transducin-like enhancer of split 2 [Source:MGI Symbol;Acc:MGI:104635]	Up	10.413	2.00081	0	188.667	4.00799e-08	2.87794e-06
Xndc1	Xrcc1 N-terminal domain containing 1 [Source:MGI Symbol;Acc:MGI:5546359]	Up	10.3175	1.90792	0	210.333	4.0156e-08	2.87794e-06
Tm4sf5	transmembrane 4 superfamily member 5 [Source:MGI Symbol;Acc:MGI:1922854]	Up	10.2293	1.8217	0	188.833	4.01675e-08	2.87794e-06
Mapk15	mitogen-activated protein kinase 15 [Source:MGI Symbol;Acc:MGI:2652894]	Up	10.6158	2.20013	0	292.333	4.07487e-08	2.90631e-06
2810408B13Rik	#N/A	Up	10.2457	1.83782	0	190	4.12983e-08	2.93218e-06
Gm10791	predicted gene 10791 [Source:MGI Symbol;Acc:MGI:3641949]	Up	10.3418	1.93158	0	202.167	4.51102e-08	3.1884e-06
Ipmk	inositol polyphosphate multikinase [Source:MGI Symbol;Acc:MGI:1916968]	Down	-1.25647	7.01847	3204.2	2281.17	4.58001e-08	3.22264e-06
Mira	#N/A	Up	2.2783	6.05455	333.2	2893.33	4.64935e-08	3.25683e-06
Sass6	SAS-6 centriolar assembly protein [Source:MGI Symbol;Acc:MGI:1920026]	Up	10.1383	1.733	0	166.833	4.72921e-08	3.29805e-06
Clca4a	chloride channel accessory 4A [Source:MGI Symbol;Acc:MGI:2139744]	Down	-2.31155	6.15225	2392.2	691.667	4.79212e-08	3.32713e-06
Rasgrf2	RAS protein-specific guanine nucleotide-releasing factor 2 [Source:MGI Symbol;Acc:MGI:109137]	Up	10.2004	1.79338	0	167.833	4.97007e-08	3.43548e-06
Brca2	breast cancer 2, early onset [Source:MGI Symbol;Acc:MGI:109337]	Up	10.3522	1.9414	0	183.333	4.99487e-08	3.43748e-06
H3f3a	H3.3 histone A [Source:MGI Symbol;Acc:MGI:1097686]	Down	-1.14918	8.21967	7492.4	5798.67	5.05387e-08	3.4629e-06
Hps3	HPS3, biogenesis of lysosomal organelles complex 2 subunit 1 [Source:MGI Symbol;Acc:MGI:2153839]	Up	10.0618	1.65883	0	174.667	5.15181e-08	3.51465e-06
Sema3f	sema domain, immunoglobulin domain (Ig), short basic domain, secreted, (semaphorin) 3F [Source:MGI Symbol;Acc:MGI:1096347]	Up	10.4738	2.06046	0	202.5	5.22278e-08	3.54765e-06
Flt3l	FMS-like tyrosine kinase 3 ligand [Source:MGI Symbol;Acc:MGI:95560]	Up	10.1588	1.75312	0	172.167	5.33712e-08	3.60969e-06
Lpar2	lysophosphatidic acid receptor 2 [Source:MGI Symbol;Acc:MGI:1858422]	Up	10.0578	1.65463	0	158.667	5.39427e-08	3.63021e-06
Dpy19l1	dpy-19-like 1 (C. elegans) [Source:MGI Symbol;Acc:MGI:1915685]	Up	10.1064	1.70228	0	181.5	5.41374e-08	3.63021e-06
Zfp944	zinc finger protein 944 [Source:MGI Symbol;Acc:MGI:2442394]	Up	10.3432	1.93305	0	212	5.6658e-08	3.78307e-06
Tmem63b	transmembrane protein 63b [Source:MGI Symbol;Acc:MGI:2387609]	Up	1.6623	6.62704	793.6	4079.33	5.71329e-08	3.79815e-06
Clca1	chloride channel accessory 1 [Source:MGI Symbol;Acc:MGI:1346342]	Down	-1.85807	10.3407	36206.6	18565.8	5.74866e-08	3.79815e-06
Svs2	#N/A	Up	13.9424	5.50118	0	3522.33	5.76101e-08	3.79815e-06
C3	complement component 3 [Source:MGI Symbol;Acc:MGI:88227]	Up	10.0925	1.68819	0	152.833	5.9134e-08	3.88231e-06
S100g	S100 calcium binding protein G [Source:MGI Symbol;Acc:MGI:104528]	Down	-3.02325	6.05375	2250	392.833	6.0884e-08	3.97233e-06
Slc27a2	solute carrier family 27 (fatty acid transporter), member 2 [Source:MGI Symbol;Acc:MGI:1347099]	Up	10.3862	1.9746	0	185.5	6.10115e-08	3.97233e-06
Atp6v0a1	ATPase, H+ transporting, lysosomal V0 subunit A1 [Source:MGI Symbol;Acc:MGI:103286]	Up	2.0711	5.62028	317.4	2170.5	6.25602e-08	4.05633e-06
Ost4	oligosaccharyltransferase complex subunit 4 (non-catalytic) [Source:MGI Symbol;Acc:MGI:1914945]	Down	-1.52432	6.5363	2298.6	1480.67	6.30896e-08	4.07383e-06
Plcl2	phospholipase C-like 2 [Source:MGI Symbol;Acc:MGI:1352756]	Down	-1.3408	8.04404	6968.4	4454.33	6.48303e-08	4.16907e-06
Gm36117	#N/A	Up	9.96747	1.56695	0	145.833	6.53919e-08	4.18802e-06
Gm36266	predicted gene, 36266 [Source:MGI Symbol;Acc:MGI:5595425]	Up	10.3225	1.91307	0	222.833	6.79716e-08	4.33554e-06
Kcnk10	potassium channel, subfamily K, member 10 [Source:MGI Symbol;Acc:MGI:1919508]	Up	9.9576	1.55768	0	161.833	6.95542e-08	4.40102e-06
Smim5	small integral membrane protein 5 [Source:MGI Symbol;Acc:MGI:1913778]	Up	8.94033	2.2098	0.2	246.333	6.95591e-08	4.40102e-06
Scgb2b10	secretoglobin, family 2B, member 10 [Source:MGI Symbol;Acc:MGI:3643785]	Up	9.97305	1.57244	0	152.167	7.44493e-08	4.6915e-06
Rrbp1	ribosome binding protein 1 [Source:MGI Symbol;Acc:MGI:1932395]	Up	1.29203	9.48295	6658.6	27521.3	7.70708e-08	4.80245e-06
Gp1ba	glycoprotein 1b, alpha polypeptide [Source:MGI Symbol;Acc:MGI:1333744]	Up	10.4775	2.0639	0	197	7.70884e-08	4.80245e-06
Ggnbp2os	#N/A	Up	10.178	1.77194	0	190.667	7.71282e-08	4.80245e-06
Tmem53	transmembrane protein 53 [Source:MGI Symbol;Acc:MGI:1916027]	Up	10.1895	1.78332	0	203.5	7.86652e-08	4.8788e-06
Trpm7	transient receptor potential cation channel, subfamily M, member 7 [Source:MGI Symbol;Acc:MGI:1929996]	Down	-2.20163	5.79674	1564.4	652.167	8.04485e-08	4.96976e-06
Tmem214	transmembrane protein 214 [Source:MGI Symbol;Acc:MGI:1916046]	Up	1.79708	6.10232	511.6	2969.33	8.37708e-08	5.1547e-06
Spata2l	spermatogenesis associated 2-like [Source:MGI Symbol;Acc:MGI:1926029]	Up	10.1786	1.77254	0	188.167	8.55814e-08	5.24554e-06
Ecm1	extracellular matrix protein 1 [Source:MGI Symbol;Acc:MGI:103060]	Up	9.85707	1.46015	0	142.333	8.66818e-08	5.29231e-06
Lypd8l	LY6/PLAUR domain containing 8 like [Source:MGI Symbol;Acc:MGI:1925604]	Down	-2.28727	6.243	2271	725.333	9.08349e-08	5.52438e-06
Nisch	nischarin [Source:MGI Symbol;Acc:MGI:1928323]	Up	1.4127	7.21627	1374.8	5900.5	9.12932e-08	5.53082e-06
Rusc2	RUN and SH3 domain containing 2 [Source:MGI Symbol;Acc:MGI:2140371]	Up	9.95628	1.55613	0	152	9.60188e-08	5.79473e-06
LOC118568705	#N/A	Down	-2.09392	8.79075	13368.6	5050.33	9.64641e-08	5.7993e-06
Ttc30b	tetratricopeptide repeat domain 30B [Source:MGI Symbol;Acc:MGI:1919671]	Up	9.94861	1.54854	0	140.667	9.71035e-08	5.81546e-06
Gpr19	G protein-coupled receptor 19 [Source:MGI Symbol;Acc:MGI:892973]	Up	9.97407	1.57323	0	142.333	1.02191e-07	6.07718e-06
2310033P09Rik	RIKEN cDNA 2310033P09 gene [Source:MGI Symbol;Acc:MGI:1915112]	Down	-1.72523	7.21017	4009.4	2000.67	1.02299e-07	6.07718e-06
H13	histocompatibility 13 [Source:MGI Symbol;Acc:MGI:95886]	Up	1.91524	7.03902	1004	5746.67	1.02635e-07	6.07718e-06
Cenph	centromere protein H [Source:MGI Symbol;Acc:MGI:1349448]	Up	9.9931	1.59201	0	158.833	1.03128e-07	6.08337e-06
Foxq1	forkhead box Q1 [Source:MGI Symbol;Acc:MGI:1298228]	Up	10.6644	2.24796	0	307.833	1.06823e-07	6.27776e-06
Nipsnap3b	nipsnap homolog 3B [Source:MGI Symbol;Acc:MGI:1913786]	Down	-1.8804	5.57663	1291	602.833	1.08028e-07	6.32488e-06
AI507597	expressed sequence AI507597 [Source:MGI Symbol;Acc:MGI:2140323]	Up	9.82962	1.43371	0	144.333	1.11704e-07	6.51581e-06
Ccdc114	#N/A	Up	10.0005	1.5991	0	159.167	1.13334e-07	6.57298e-06
Zfp281	zinc finger protein 281 [Source:MGI Symbol;Acc:MGI:3029290]	Up	10.2615	1.85292	0	178.333	1.13522e-07	6.57298e-06
Gm33617	#N/A	Up	9.99371	1.59253	0	153.5	1.14868e-07	6.62643e-06
Cpn1	carboxypeptidase N, polypeptide 1 [Source:MGI Symbol;Acc:MGI:2135874]	Down	-3.10944	4.6722	857	166	1.16317e-07	6.68547e-06
Hykk	hydroxylysine kinase 1 [Source:MGI Symbol;Acc:MGI:2443139]	Up	10.2003	1.79368	0	194.833	1.1693e-07	6.69615e-06
Kcnf1	potassium voltage-gated channel, subfamily F, member 1 [Source:MGI Symbol;Acc:MGI:2687399]	Up	9.99211	1.59131	0	174.167	1.18918e-07	6.78525e-06
Tecr	trans-2,3-enoyl-CoA reductase [Source:MGI Symbol;Acc:MGI:1915408]	Up	1.12746	7.69583	2163	8115.5	1.21953e-07	6.93318e-06
Serac1	serine active site containing 1 [Source:MGI Symbol;Acc:MGI:2447813]	Up	9.97536	1.57487	0	158.5	1.22501e-07	6.93925e-06
Phka1	phosphorylase kinase alpha 1 [Source:MGI Symbol;Acc:MGI:97576]	Up	9.82106	1.42518	0	138.833	1.24132e-07	6.98167e-06
Coro1a	coronin, actin binding protein 1A [Source:MGI Symbol;Acc:MGI:1345961]	Up	9.74876	1.35529	0	128.333	1.2414e-07	6.98167e-06
St6galnac6	ST6 (alpha-N-acetyl-neuraminyl-2,3-beta-galactosyl-1,3)-N-acetylgalactosaminide alpha-2,6-sialyltransferase 6 [Source:MGI Symbol;Acc:MGI:1355316]	Up	1.18067	9.09569	5448.8	22523.5	1.24964e-07	7.00288e-06
Gm16143	predicted gene 16143 [Source:MGI Symbol;Acc:MGI:3801780]	Up	9.86665	1.4695	0	151.333	1.26734e-07	7.07681e-06
Tmem64	transmembrane protein 64 [Source:MGI Symbol;Acc:MGI:2140359]	Up	10.0909	1.6874	0	193.667	1.28825e-07	7.16804e-06
Ccdc107	coiled-coil domain containing 107 [Source:MGI Symbol;Acc:MGI:1913423]	Up	1.95666	6.69258	720.4	4579.67	1.30088e-07	7.21278e-06
Eme1	essential meiotic structure-specific endonuclease 1 [Source:MGI Symbol;Acc:MGI:3576783]	Up	9.8276	1.43156	0	135.667	1.32153e-07	7.28202e-06
Nkiras2	NFKB inhibitor interacting Ras-like protein 2 [Source:MGI Symbol;Acc:MGI:1919216]	Down	-2.53539	5.27785	1199.6	328.5	1.32265e-07	7.28202e-06
Mycbpap	MYCBP associated protein [Source:MGI Symbol;Acc:MGI:2388726]	Up	10.1359	1.73081	0	169.333	1.34292e-07	7.36775e-06
Dancr	differentiation antagonizing non-protein coding RNA [Source:MGI Symbol;Acc:MGI:1917286]	Up	10.0107	1.60866	0	145.333	1.41126e-07	7.71571e-06
Ckmt2	creatine kinase, mitochondrial 2 [Source:MGI Symbol;Acc:MGI:1923972]	Up	10.0447	1.64229	0	170	1.43101e-07	7.79653e-06
Hnf1aos1	HNF1 homeobox A, opposite strand 1 [Source:MGI Symbol;Acc:MGI:3652225]	Up	10.1712	1.76559	0	199.333	1.4469e-07	7.85583e-06
D930048N14Rik	RIKEN cDNA D930048N14 gene [Source:MGI Symbol;Acc:MGI:2144709]	Up	9.97867	1.5779	0	156	1.49772e-07	8.10371e-06
Ilkap	integrin-linked kinase-associated serine/threonine phosphatase 2C [Source:MGI Symbol;Acc:MGI:1914694]	Up	2.00238	6.30372	557.6	3467.17	1.52722e-07	8.23492e-06
Slc38a6	solute carrier family 38, member 6 [Source:MGI Symbol;Acc:MGI:3648156]	Up	10.0827	1.67864	0	149.333	1.59818e-07	8.58802e-06
Ager	advanced glycosylation end product-specific receptor [Source:MGI Symbol;Acc:MGI:893592]	Up	10.5425	2.12736	0	196	1.60376e-07	8.5886e-06
9130410C08Rik	RIKEN cDNA 9130410C08 gene [Source:MGI Symbol;Acc:MGI:1918862]	Up	9.88018	1.48245	0	141.5	1.65265e-07	8.80625e-06
Snord96a	small nucleolar RNA, C/D box 96A [Source:MGI Symbol;Acc:MGI:3819568]	Up	9.99787	1.59615	0	141.167	1.65563e-07	8.80625e-06
Tmc6	transmembrane channel-like gene family 6 [Source:MGI Symbol;Acc:MGI:1098686]	Up	2.60268	6.39023	407.2	3959.33	1.70281e-07	9.00763e-06
Krcc1	lysine-rich coiled-coil 1 [Source:MGI Symbol;Acc:MGI:1889377]	Down	-1.3404	6.87357	2860	2032.67	1.70497e-07	9.00763e-06
Gm15708	predicted gene 15708 [Source:MGI Symbol;Acc:MGI:3783149]	Up	10.0621	1.65872	0	148.167	1.71559e-07	9.03335e-06
Syn2	synapsin II [Source:MGI Symbol;Acc:MGI:103020]	Up	10.333	1.92316	0	222.667	1.7497e-07	9.18213e-06
Dscc1	DNA replication and sister chromatid cohesion 1 [Source:MGI Symbol;Acc:MGI:1919357]	Up	9.70618	1.31432	0	132.167	1.76146e-07	9.21301e-06
Slc25a24	solute carrier family 25 (mitochondrial carrier, phosphate carrier), member 24 [Source:MGI Symbol;Acc:MGI:1917160]	Down	-1.22526	7.37511	3994.4	2928.33	1.77688e-07	9.25656e-06
Sting1	stimulator of interferon response cGAMP interactor 1 [Source:MGI Symbol;Acc:MGI:1919762]	Up	10.0619	1.65915	0	180.167	1.78158e-07	9.25656e-06
Fut11	fucosyltransferase 11 [Source:MGI Symbol;Acc:MGI:1920318]	Up	8.91602	2.24807	0.2	273.833	1.79732e-07	9.30752e-06
Tceal9	transcription elongation factor A like 9 [Source:MGI Symbol;Acc:MGI:109567]	Down	-1.22004	7.38836	4272.8	3074.5	1.80642e-07	9.32386e-06
Rbm5	RNA binding motif protein 5 [Source:MGI Symbol;Acc:MGI:1933204]	Up	1.67646	6.31705	584.6	3224.83	1.84908e-07	9.51278e-06
Adamtsl4	ADAMTS-like 4 [Source:MGI Symbol;Acc:MGI:2389008]	Up	9.82152	1.42562	0	139.5	1.86106e-07	9.5431e-06
Cldn15	claudin 15 [Source:MGI Symbol;Acc:MGI:1913103]	Up	1.39276	7.50117	1683.6	7280.67	1.96042e-07	1.00199e-05
Angel1	angel homolog 1 [Source:MGI Symbol;Acc:MGI:1915987]	Up	9.77461	1.37999	0	122.667	2.00237e-07	1.01777e-05
Ccdc57	coiled-coil domain containing 57 [Source:MGI Symbol;Acc:MGI:1918526]	Up	8.91769	2.24813	0.2	217.5	2.00794e-07	1.01777e-05
Slc2a5	solute carrier family 2 (facilitated glucose transporter), member 5 [Source:MGI Symbol;Acc:MGI:1928369]	Up	9.97489	1.57402	0	141.833	2.01075e-07	1.01777e-05
Rps5	ribosomal protein S5 [Source:MGI Symbol;Acc:MGI:1097682]	Up	1.07892	10.1065	11970.2	44486	2.03064e-07	1.02453e-05
Tmx4	thioredoxin-related transmembrane protein 4 [Source:MGI Symbol;Acc:MGI:106558]	Up	9.98785	1.58631	0	139.167	2.06043e-07	1.03622e-05
Aoc2	amine oxidase, copper containing 2 (retina-specific) [Source:MGI Symbol;Acc:MGI:2668431]	Up	10.1325	1.72705	0	151.333	2.07209e-07	1.03876e-05
Ptpru	protein tyrosine phosphatase, receptor type, U [Source:MGI Symbol;Acc:MGI:1321151]	Up	10.3743	1.96346	0	219.833	2.08119e-07	1.04e-05
Tmem86b	transmembrane protein 86B [Source:MGI Symbol;Acc:MGI:1915505]	Up	9.72111	1.32878	0	128.667	2.10139e-07	1.04676e-05
Gm46289	#N/A	Up	8.62113	1.78379	0.2	183	2.14879e-07	1.06698e-05
Gm41949	#N/A	Up	10.0139	1.6115	0	138.167	2.22106e-07	1.09284e-05
Slc12a8	solute carrier family 12 (potassium/chloride transporters), member 8 [Source:MGI Symbol;Acc:MGI:2443672]	Up	1.524	6.69509	837	4261.67	2.22146e-07	1.09284e-05
Trim45	tripartite motif-containing 45 [Source:MGI Symbol;Acc:MGI:1918187]	Up	9.92099	1.52198	0	153.333	2.22177e-07	1.09284e-05
Unc5cl	unc-5 family C-terminal like [Source:MGI Symbol;Acc:MGI:1923839]	Up	10.2186	1.81141	0	180.833	2.37387e-07	1.16401e-05
Wfs1	wolframin ER transmembrane glycoprotein [Source:MGI Symbol;Acc:MGI:1328355]	Up	8.11873	2.75048	0.6	369.333	2.4254e-07	1.18558e-05
Mt1	metallothionein 1 [Source:MGI Symbol;Acc:MGI:97171]	Up	2.13226	8.13744	1871.6	11532.2	2.50516e-07	1.22076e-05
Egfl8	EGF-like domain 8 [Source:MGI Symbol;Acc:MGI:1932094]	Up	9.81387	1.41841	0	144.5	2.52342e-07	1.22585e-05
Chp1	calcineurin-like EF hand protein 1 [Source:MGI Symbol;Acc:MGI:1927185]	Down	-1.44608	8.15913	7330	4341.33	2.53582e-07	1.22807e-05
Zfp28	zinc finger protein 28 [Source:MGI Symbol;Acc:MGI:99175]	Up	9.84752	1.4506	0	131.833	2.66391e-07	1.28614e-05
Gm35551	predicted gene, 35551 [Source:MGI Symbol;Acc:MGI:5594710]	Up	9.94276	1.54301	0	155.5	2.70915e-07	1.30396e-05
H2-M3	histocompatibility 2, M region locus 3 [Source:MGI Symbol;Acc:MGI:95915]	Up	9.94087	1.54191	0	179.667	2.79184e-07	1.33965e-05
Impact	impact, RWD domain protein [Source:MGI Symbol;Acc:MGI:1098233]	Up	10.4272	2.01481	0	207.333	2.85288e-07	1.36066e-05
Gm32738	#N/A	Up	8.39645	2.65959	0.6	293.333	2.85296e-07	1.36066e-05
Tube1	tubulin, epsilon 1 [Source:MGI Symbol;Acc:MGI:1919174]	Up	10.0707	1.66788	0	195.333	2.89687e-07	1.37742e-05
Zfp58	zinc finger protein 58 [Source:MGI Symbol;Acc:MGI:99205]	Up	10.0067	1.60572	0	186.833	2.92403e-07	1.38613e-05
Cdk20	cyclin-dependent kinase 20 [Source:MGI Symbol;Acc:MGI:2145349]	Up	9.84446	1.44833	0	161.5	2.95019e-07	1.39432e-05
Snx16	sorting nexin 16 [Source:MGI Symbol;Acc:MGI:1921968]	Up	9.57158	1.18483	0	120.167	2.9686e-07	1.39881e-05
Nfkbid	nuclear factor of kappa light polypeptide gene enhancer in B cells inhibitor, delta [Source:MGI Symbol;Acc:MGI:3041243]	Up	9.82091	1.42539	0	148.667	2.99995e-07	1.40226e-05
Dnm1	dynamin 1 [Source:MGI Symbol;Acc:MGI:107384]	Up	10.4484	2.03546	0	189.667	3.00275e-07	1.40226e-05
Gm35189	predicted gene, 35189 [Source:MGI Symbol;Acc:MGI:5594348]	Up	9.7041	1.31194	0	119.833	3.00481e-07	1.40226e-05
Lnpk	lunapark, ER junction formation factor [Source:MGI Symbol;Acc:MGI:1918115]	Up	10.0279	1.62609	0	183.167	3.01167e-07	1.40226e-05
Dclre1c	DNA cross-link repair 1C [Source:MGI Symbol;Acc:MGI:2441769]	Up	10.1903	1.78385	0	191.833	3.06596e-07	1.41999e-05
Dipk1b	divergent protein kinase domain 1B [Source:MGI Symbol;Acc:MGI:1927576]	Up	9.96948	1.5695	0	175.167	3.06785e-07	1.41999e-05
Arhgdig	Rho GDP dissociation inhibitor (GDI) gamma [Source:MGI Symbol;Acc:MGI:108430]	Up	10.4596	2.04673	0	207.333	3.11745e-07	1.4387e-05
Gm33309	#N/A	Up	9.68927	1.29755	0	116.5	3.13594e-07	1.44299e-05
Man1b1	mannosidase, alpha, class 1B, member 1 [Source:MGI Symbol;Acc:MGI:2684954]	Up	1.47072	6.02928	560.4	2681.5	3.14828e-07	1.44444e-05
Fam161a	family with sequence similarity 161, member A [Source:MGI Symbol;Acc:MGI:1921123]	Up	10.0679	1.66488	0	181	3.18191e-07	1.45561e-05
Clasrp	CLK4-associating serine/arginine rich protein [Source:MGI Symbol;Acc:MGI:1855695]	Up	1.99227	5.48419	286.2	1888.83	3.23226e-07	1.47434e-05
Ahcy	S-adenosylhomocysteine hydrolase [Source:MGI Symbol;Acc:MGI:87968]	Down	-1.02744	8.19444	6932	5732.33	3.26683e-07	1.48579e-05
Rab5c	RAB5C, member RAS oncogene family [Source:MGI Symbol;Acc:MGI:105306]	Down	-1.22578	7.31627	3980.4	2780.83	3.43377e-07	1.5572e-05
BC051142	cDNA sequence BC051142 [Source:MGI Symbol;Acc:MGI:3039565]	Down	-2.63063	5.06125	1102.2	268.167	3.47178e-07	1.56991e-05
Adipor1	adiponectin receptor 1 [Source:MGI Symbol;Acc:MGI:1919924]	Down	-0.974398	7.9639	5840.6	5102.33	3.49137e-07	1.57423e-05
Fcamr	Fc receptor, IgA, IgM, high affinity [Source:MGI Symbol;Acc:MGI:1927803]	Up	9.69856	1.30679	0	125.5	3.60413e-07	1.62041e-05
Snrnp70	small nuclear ribonucleoprotein 70 (U1) [Source:MGI Symbol;Acc:MGI:98341]	Up	1.54839	7.14253	1310	5908.33	3.61657e-07	1.62136e-05
Zfp141	zinc finger protein 141 [Source:MGI Symbol;Acc:MGI:3584269]	Up	10.0543	1.65132	0	167.5	3.70946e-07	1.65826e-05
Wdr25	WD repeat domain 25 [Source:MGI Symbol;Acc:MGI:3045255]	Up	9.87546	1.47816	0	149.667	3.81916e-07	1.70245e-05
Cacna1b	calcium channel, voltage-dependent, N type, alpha 1B subunit [Source:MGI Symbol;Acc:MGI:88296]	Up	10.2176	1.81015	0	175	3.88062e-07	1.72495e-05
Gm16973	predicted gene, 16973 [Source:MGI Symbol;Acc:MGI:4439897]	Up	9.89693	1.49833	0	142.167	3.9168e-07	1.73566e-05
Cldn14	claudin 14 [Source:MGI Symbol;Acc:MGI:1860425]	Up	10.8648	2.44478	0	361.5	3.93495e-07	1.73566e-05
4831440E17Rik	#N/A	Up	8.52041	1.68348	0.2	167.667	3.93791e-07	1.73566e-05
8430430B14Rik	RIKEN cDNA 8430430B14 gene [Source:MGI Symbol;Acc:MGI:1925398]	Up	9.73046	1.33742	0	120.833	3.98621e-07	1.75203e-05
Tbc1d17	TBC1 domain family, member 17 [Source:MGI Symbol;Acc:MGI:2449973]	Up	1.94187	5.70896	343.2	2288.83	4.01182e-07	1.75836e-05
Bri3	brain protein I3 [Source:MGI Symbol;Acc:MGI:1933174]	Down	-1.20291	7.0013	3213.8	2301.5	4.2666e-07	1.86482e-05
9130023H24Rik	RIKEN cDNA 9130023H24 gene [Source:MGI Symbol;Acc:MGI:2442738]	Up	9.39292	1.01329	0	102.667	4.38854e-07	1.91279e-05
Kctd5	potassium channel tetramerisation domain containing 5 [Source:MGI Symbol;Acc:MGI:1916509]	Down	-1.42626	5.95547	1562.6	1059.5	4.4507e-07	1.93451e-05
1110051M20Rik	#N/A	Up	9.6418	1.25252	0	128.667	4.46852e-07	1.9369e-05
Dync1i2	dynein cytoplasmic 1 intermediate chain 2 [Source:MGI Symbol;Acc:MGI:107750]	Down	-1.31147	8.10073	7368.2	4691.17	4.53706e-07	1.96119e-05
Slc39a7	solute carrier family 39 (zinc transporter), member 7 [Source:MGI Symbol;Acc:MGI:95909]	Up	1.64138	7.48219	1557.6	7588.17	4.5585e-07	1.96504e-05
Spint1	serine protease inhibitor, Kunitz type 1 [Source:MGI Symbol;Acc:MGI:1338033]	Up	1.32796	6.93384	1157	4998.5	4.58878e-07	1.97267e-05
Itih2	inter-alpha trypsin inhibitor, heavy chain 2 [Source:MGI Symbol;Acc:MGI:96619]	Up	10.7547	2.3367	0	345.167	4.64086e-07	1.98961e-05
Gm46914	#N/A	Up	9.76678	1.37221	0	121	4.66731e-07	1.9955e-05
Lhfpl4	lipoma HMGIC fusion partner-like protein 4 [Source:MGI Symbol;Acc:MGI:3057108]	Up	9.64567	1.25561	0	114.333	4.94038e-07	2.10651e-05
Gprasp1	G protein-coupled receptor associated sorting protein 1 [Source:MGI Symbol;Acc:MGI:1917418]	Up	9.62494	1.23596	0	115.5	5.36376e-07	2.28083e-05
Ephb4	Eph receptor B4 [Source:MGI Symbol;Acc:MGI:104757]	Up	1.9268	6.32457	561	3659.5	5.4116e-07	2.29496e-05
Gm50587	#N/A	Up	9.40336	1.02359	0	109.333	5.54642e-07	2.34579e-05
Mvd	mevalonate (diphospho) decarboxylase [Source:MGI Symbol;Acc:MGI:2179327]	Up	1.61313	6.41558	670.6	3533.83	5.83952e-07	2.46311e-05
Aldh16a1	aldehyde dehydrogenase 16 family, member A1 [Source:MGI Symbol;Acc:MGI:1916998]	Up	1.44966	6.58101	813	3892.33	5.86256e-07	2.46621e-05
Sptssb	serine palmitoyltransferase, small subunit B [Source:MGI Symbol;Acc:MGI:1913433]	Down	-2.25009	7.54264	5644.2	1780.83	6.21403e-07	2.60707e-05
Ndufb9	NADH:ubiquinone oxidoreductase subunit B9 [Source:MGI Symbol;Acc:MGI:1913468]	Up	1.14106	8.65122	4061.4	16006.5	6.32694e-07	2.64736e-05
Fth1	ferritin heavy polypeptide 1 [Source:MGI Symbol;Acc:MGI:95588]	Down	-1.06027	12.1716	112041	87259.8	6.48169e-07	2.7049e-05
Scd2	stearoyl-Coenzyme A desaturase 2 [Source:MGI Symbol;Acc:MGI:98240]	Up	1.74813	8.25257	2273.4	14103.8	6.54736e-07	2.72506e-05
Ccsap	centriole, cilia and spindle associated protein [Source:MGI Symbol;Acc:MGI:1920670]	Up	9.22701	0.855124	0	91.3333	6.71018e-07	2.78544e-05
A730017L22Rik	RIKEN cDNA A730017L22 gene [Source:MGI Symbol;Acc:MGI:3584452]	Up	9.52542	1.1406	0	122	6.7923e-07	2.81208e-05
Flywch1	FLYWCH-type zinc finger 1 [Source:MGI Symbol;Acc:MGI:2442638]	Down	-1.95469	5.73298	1532.2	628.333	6.87804e-07	2.837e-05
Cpa2	carboxypeptidase A2, pancreatic [Source:MGI Symbol;Acc:MGI:3617840]	Up	7.58613	1.67196	0.4	172	6.90064e-07	2.837e-05
Ghr	growth hormone receptor [Source:MGI Symbol;Acc:MGI:95708]	Up	10.2843	1.87602	0	228.5	6.90673e-07	2.837e-05
Rpl8	ribosomal protein L8 [Source:MGI Symbol;Acc:MGI:1350927]	Up	0.962753	11.2462	26822.2	94382	7.06205e-07	2.89323e-05
Lamc1	laminin, gamma 1 [Source:MGI Symbol;Acc:MGI:99914]	Up	9.5712	1.18427	0	112.667	7.10506e-07	2.90059e-05
Maoa	monoamine oxidase A [Source:MGI Symbol;Acc:MGI:96915]	Down	-1.09644	9.44163	17156.8	13018.3	7.1178e-07	2.90059e-05
Vsig10l	V-set and immunoglobulin domain containing 10 like [Source:MGI Symbol;Acc:MGI:1922940]	Up	9.6142	1.22535	0	112.833	7.13547e-07	2.90059e-05
Ciao2a	cytosolic iron-sulfur assembly component 2A [Source:MGI Symbol;Acc:MGI:1915500]	Down	-1.5985	6.5107	2393	1484.17	7.29243e-07	2.95673e-05
Klhl23	kelch-like 23 [Source:MGI Symbol;Acc:MGI:2683536]	Up	9.66821	1.27787	0	128.167	7.34864e-07	2.97184e-05
Adh1	alcohol dehydrogenase 1 (class I) [Source:MGI Symbol;Acc:MGI:87921]	Up	2.25664	9.81033	4950.6	49862.5	7.50412e-07	3.02692e-05
Mamdc4	MAM domain containing 4 [Source:MGI Symbol;Acc:MGI:2685841]	Up	9.40353	1.02326	0	97.5	7.56146e-07	3.03993e-05
Asic1	acid-sensing (proton-gated) ion channel 1 [Source:MGI Symbol;Acc:MGI:1194915]	Up	9.75005	1.35685	0	133.167	7.57661e-07	3.03993e-05
Cyba	cytochrome b-245, alpha polypeptide [Source:MGI Symbol;Acc:MGI:1316658]	Up	1.39537	7.13481	1381.2	5898.83	7.59449e-07	3.03993e-05
3930402G23Rik	RIKEN cDNA 3930402G23 gene [Source:MGI Symbol;Acc:MGI:1921277]	Up	9.94383	1.54406	0	143.5	7.78536e-07	3.1084e-05
Zfp930	zinc finger protein 930 [Source:MGI Symbol;Acc:MGI:2675306]	Up	9.70094	1.30883	0	116.167	7.92557e-07	3.15635e-05
Tceanc	transcription elongation factor A (SII) N-terminal and central domain containing [Source:MGI Symbol;Acc:MGI:2685236]	Up	9.52958	1.145	0	131	8.0053e-07	3.18003e-05
Kntc1	kinetochore associated 1 [Source:MGI Symbol;Acc:MGI:2673709]	Up	9.80083	1.40568	0	137.5	8.1303e-07	3.22153e-05
Mterf1a	mitochondrial transcription termination factor 1a [Source:MGI Symbol;Acc:MGI:1918240]	Up	9.76887	1.37543	0	150.667	8.24023e-07	3.25686e-05
Pmp22	peripheral myelin protein 22 [Source:MGI Symbol;Acc:MGI:97631]	Down	-1.46053	6.93818	3207.8	2059.83	8.35216e-07	3.29281e-05
Ror2	receptor tyrosine kinase-like orphan receptor 2 [Source:MGI Symbol;Acc:MGI:1347521]	Up	9.64471	1.2556	0	134.833	8.56675e-07	3.36651e-05
Snx7	sorting nexin 7 [Source:MGI Symbol;Acc:MGI:1923811]	Down	-2.07452	6.06823	1963.2	729.667	8.58202e-07	3.36651e-05
Afm	afamin [Source:MGI Symbol;Acc:MGI:2429409]	Up	9.48812	1.10493	0	120.833	8.6381e-07	3.3682e-05
Fer1l4	fer-1-like 4 (C. elegans) [Source:MGI Symbol;Acc:MGI:1921812]	Up	9.54716	1.16096	0	108.5	8.64108e-07	3.3682e-05
Cfp	complement factor properdin [Source:MGI Symbol;Acc:MGI:97545]	Up	9.96029	1.55995	0	152.667	8.65073e-07	3.3682e-05
Kcnk3	potassium channel, subfamily K, member 3 [Source:MGI Symbol;Acc:MGI:1100509]	Up	9.39273	1.01302	0	97.6667	8.9069e-07	3.45936e-05
Sema6b	sema domain, transmembrane domain (TM), and cytoplasmic domain, (semaphorin) 6B [Source:MGI Symbol;Acc:MGI:1202889]	Up	9.38372	1.00486	0	110	9.14121e-07	3.5416e-05
Znrf3	zinc and ring finger 3 [Source:MGI Symbol;Acc:MGI:3039616]	Up	8.33263	1.49913	0.2	159.5	9.26035e-07	3.57892e-05
Rbpms	RNA binding protein gene with multiple splicing [Source:MGI Symbol;Acc:MGI:1334446]	Up	9.59073	1.20249	0	105.167	9.36385e-07	3.61003e-05
Get4	golgi to ER traffic protein 4 [Source:MGI Symbol;Acc:MGI:1914854]	Up	1.73684	5.63325	397.2	2119.5	9.55381e-07	3.67423e-05
Lsr	lipolysis stimulated lipoprotein receptor [Source:MGI Symbol;Acc:MGI:1927471]	Up	2.16005	6.97227	682.6	6269.67	9.66688e-07	3.70863e-05
Bbof1	basal body orientation factor 1 [Source:MGI Symbol;Acc:MGI:1920123]	Up	9.33867	0.961417	0	99.5	9.72478e-07	3.71691e-05
Rsbn1	rosbin, round spermatid basic protein 1 [Source:MGI Symbol;Acc:MGI:2444993]	Down	-2.645	4.60721	757.8	201.5	9.73584e-07	3.71691e-05
Rap1gapos	RAP1 GTPase activating protein, opposite strand [Source:MGI Symbol;Acc:MGI:1917058]	Up	9.32349	0.946757	0	95.3333	9.80395e-07	3.73383e-05
Rhov	ras homolog family member V [Source:MGI Symbol;Acc:MGI:2444227]	Up	9.86302	1.46571	0	136	1.00011e-06	3.79969e-05
Tmem97	transmembrane protein 97 [Source:MGI Symbol;Acc:MGI:1916321]	Up	1.81868	6.31682	553.6	3436.5	1.01857e-06	3.86031e-05
Tmtc3	transmembrane and tetratricopeptide repeat containing 3 [Source:MGI Symbol;Acc:MGI:3036255]	Up	9.7041	1.31184	0	119.833	1.02099e-06	3.86031e-05
Gm28913	predicted gene 28913 [Source:MGI Symbol;Acc:MGI:5579619]	Up	9.62838	1.23899	0	113.5	1.03703e-06	3.90889e-05
Abhd11	abhydrolase domain containing 11 [Source:MGI Symbol;Acc:MGI:1916008]	Up	1.22204	6.73155	1041.8	4082.83	1.03882e-06	3.90889e-05
Laptm5	lysosomal-associated protein transmembrane 5 [Source:MGI Symbol;Acc:MGI:108046]	Up	9.35985	0.981795	0	103	1.04999e-06	3.94148e-05
LOC118568244	#N/A	Up	9.29157	0.916724	0	99.5	1.07135e-06	4.01206e-05
Gm36317	#N/A	Up	9.48657	1.10348	0	118.333	1.08794e-06	4.06429e-05
Platr26	pluripotency associated transcript 26 [Source:MGI Symbol;Acc:MGI:2686477]	Up	8.95995	0.602177	0	76.6667	1.09186e-06	4.06429e-05
Msn	moesin [Source:MGI Symbol;Acc:MGI:97167]	Up	9.20953	0.838984	0	99.1667	1.09385e-06	4.06429e-05
Tmsb4x	thymosin, beta 4, X chromosome [Source:MGI Symbol;Acc:MGI:99510]	Down	-0.985082	9.25956	14658.6	11959.8	1.09566e-06	4.06429e-05
Slc43a1	solute carrier family 43, member 1 [Source:MGI Symbol;Acc:MGI:1931352]	Up	9.63138	1.24318	0	146.833	1.12242e-06	4.14443e-05
Smim27	small integral membrane protein 27 [Source:MGI Symbol;Acc:MGI:1913684]	Up	9.06686	0.702946	0	80.3333	1.12254e-06	4.14443e-05
Gm30139	#N/A	Up	10.2824	1.87366	0	188.333	1.12724e-06	4.15078e-05
1700028E10Rik	RIKEN cDNA 1700028E10 gene [Source:MGI Symbol;Acc:MGI:1916713]	Up	9.20632	0.835389	0	92.3333	1.12955e-06	4.15078e-05
Zfp974	zinc finger protein 974 [Source:MGI Symbol;Acc:MGI:1920680]	Up	9.36125	0.982613	0	92	1.14577e-06	4.20053e-05
Vwa5b2	von Willebrand factor A domain containing 5B2 [Source:MGI Symbol;Acc:MGI:2681859]	Up	8.48101	1.82431	0.2	203.833	1.16642e-06	4.26626e-05
Tmem51os1	Tmem51 opposite strand 1 [Source:MGI Symbol;Acc:MGI:3642733]	Up	9.83239	1.43565	0	124.167	1.17362e-06	4.28001e-05
Atp2a3	ATPase, Ca++ transporting, ubiquitous [Source:MGI Symbol;Acc:MGI:1194503]	Up	1.13843	9.44956	6986.4	27533	1.17563e-06	4.28001e-05
Ahnak2	AHNAK nucleoprotein 2 [Source:MGI Symbol;Acc:MGI:2144831]	Up	9.22717	0.855548	0	98.3333	1.18011e-06	4.28635e-05
Pstpip1	proline-serine-threonine phosphatase-interacting protein 1 [Source:MGI Symbol;Acc:MGI:1321396]	Up	9.47993	1.09662	0	104.333	1.18326e-06	4.28787e-05
Pak6	p21 (RAC1) activated kinase 6 [Source:MGI Symbol;Acc:MGI:2679420]	Up	8.89807	0.543943	0	72.5	1.20593e-06	4.3557e-05
4930447F24Rik	RIKEN cDNA 4930447F24 gene [Source:MGI Symbol;Acc:MGI:1924123]	Up	8.06556	2.70297	0.6	316	1.20753e-06	4.3557e-05
Gm12536	predicted gene 12536 [Source:MGI Symbol;Acc:MGI:3650719]	Up	9.17165	0.802099	0	82	1.2154e-06	4.37403e-05
Omd	osteomodulin [Source:MGI Symbol;Acc:MGI:1350918]	Up	9.16642	0.797054	0	82	1.23999e-06	4.44297e-05
Gm11767	predicted gene 11767 [Source:MGI Symbol;Acc:MGI:3650674]	Up	9.58456	1.19747	0	122.833	1.24021e-06	4.44297e-05
A030001D20Rik	RIKEN cDNA A030001D20 gene [Source:MGI Symbol;Acc:MGI:3696869]	Up	9.73601	1.34286	0	123.833	1.26103e-06	4.50726e-05
Gm41829	#N/A	Up	9.08926	0.724018	0	78.8333	1.27424e-06	4.54413e-05
Wdr5b	WD repeat domain 5B [Source:MGI Symbol;Acc:MGI:1916794]	Up	9.38448	1.00541	0	106.833	1.28091e-06	4.55753e-05
Lmo4	LIM domain only 4 [Source:MGI Symbol;Acc:MGI:109360]	Down	-1.38645	6.21127	1856.4	1294.33	1.29868e-06	4.60549e-05
Mcm8	minichromosome maintenance 8 homologous recombination repair factor [Source:MGI Symbol;Acc:MGI:1913884]	Up	9.424	1.04268	0	97	1.30026e-06	4.60549e-05
Lyve1	lymphatic vessel endothelial hyaluronan receptor 1 [Source:MGI Symbol;Acc:MGI:2136348]	Up	8.08464	1.52396	0.2	141.333	1.30723e-06	4.61976e-05
Fdxacb1	ferredoxin-fold anticodon binding domain containing 1 [Source:MGI Symbol;Acc:MGI:3584513]	Up	9.87649	1.47856	0	130.667	1.33164e-06	4.695e-05
Pan2	PAN2 poly(A) specific ribonuclease subunit [Source:MGI Symbol;Acc:MGI:1918984]	Up	2.22511	5.38818	243.8	1794.83	1.3345e-06	4.695e-05
Gm34194	#N/A	Up	9.01162	0.650918	0	78.8333	1.34822e-06	4.73266e-05
Ms4a10	membrane-spanning 4-domains, subfamily A, member 10 [Source:MGI Symbol;Acc:MGI:1917076]	Up	9.55017	1.16482	0	130.5	1.35371e-06	4.74131e-05
Egfl7	EGF-like domain 7 [Source:MGI Symbol;Acc:MGI:2449923]	Up	9.74656	1.35341	0	131.5	1.36663e-06	4.7759e-05
Fbxo10	F-box protein 10 [Source:MGI Symbol;Acc:MGI:2686937]	Up	9.10746	0.741398	0	82	1.3826e-06	4.82097e-05
Gm22043	predicted gene, 22043 [Source:MGI Symbol;Acc:MGI:5451820]	Up	9.03225	0.6703	0	76.3333	1.38682e-06	4.82495e-05
Pik3ip1	phosphoinositide-3-kinase interacting protein 1 [Source:MGI Symbol;Acc:MGI:1917016]	Up	8.861	0.50928	0	71.6667	1.41753e-06	4.91104e-05
Notch4	notch 4 [Source:MGI Symbol;Acc:MGI:107471]	Up	9.93627	1.53731	0	164	1.41782e-06	4.91104e-05
Mki67	antigen identified by monoclonal antibody Ki 67 [Source:MGI Symbol;Acc:MGI:106035]	Up	2.1935	6.65008	502.6	4633	1.46572e-06	5.06577e-05
Catsperd	cation channel sperm associated auxiliary subunit delta [Source:MGI Symbol;Acc:MGI:2147030]	Up	9.52302	1.13861	0	122.5	1.4976e-06	5.16456e-05
Ap3s1	adaptor-related protein complex 3, sigma 1 subunit [Source:MGI Symbol;Acc:MGI:1337062]	Down	-1.77906	5.95951	1816.4	887.667	1.50277e-06	5.16794e-05
Dimt1	DIM1 dimethyladenosine transferase 1-like (S. cerevisiae) [Source:MGI Symbol;Acc:MGI:1913504]	Up	8.9705	0.612241	0	77.6667	1.50647e-06	5.16794e-05
Irak1	interleukin-1 receptor-associated kinase 1 [Source:MGI Symbol;Acc:MGI:107420]	Up	1.42168	6.90187	1041.2	4818.5	1.51083e-06	5.16794e-05
Ceacam1	CEA cell adhesion molecule 1 [Source:MGI Symbol;Acc:MGI:1347245]	Down	-1.31948	9.91495	24715.6	15449.5	1.51175e-06	5.16794e-05
Car15	carbonic anhydrase 15 [Source:MGI Symbol;Acc:MGI:1931324]	Up	9.59649	1.20911	0	128.333	1.51593e-06	5.17098e-05
Ptma	prothymosin alpha [Source:MGI Symbol;Acc:MGI:97803]	Down	-1.15526	9.37042	17429.6	12071.5	1.521e-06	5.177e-05
Neurl1a	neuralized E3 ubiquitin protein ligase 1A [Source:MGI Symbol;Acc:MGI:1334263]	Up	9.76258	1.36896	0	133.667	1.61232e-06	5.47597e-05
Klk1b4	kallikrein 1-related pepidase b4 [Source:MGI Symbol;Acc:MGI:97320]	Up	8.8002	0.452018	0	66	1.61816e-06	5.47676e-05
3000002C10Rik	RIKEN cDNA 3000002C10 gene [Source:MGI Symbol;Acc:MGI:3036226]	Up	9.12976	0.762536	0	84	1.61954e-06	5.47676e-05
4931413K12Rik	RIKEN cDNA 4931413K12 gene [Source:MGI Symbol;Acc:MGI:1918237]	Up	10.2773	1.86818	0	169	1.63295e-06	5.50013e-05
Clcn4	chloride channel, voltage-sensitive 4 [Source:MGI Symbol;Acc:MGI:104571]	Up	1.65781	6.15262	576.4	3054.33	1.63346e-06	5.50013e-05
Gm46967	#N/A	Up	9.19678	0.82642	0	94.8333	1.6399e-06	5.51e-05
Bard1	BRCA1 associated RING domain 1 [Source:MGI Symbol;Acc:MGI:1328361]	Up	9.36349	0.984457	0	91.6667	1.66441e-06	5.58039e-05
Mrps34	mitochondrial ribosomal protein S34 [Source:MGI Symbol;Acc:MGI:1930188]	Up	1.36674	6.57905	954.8	3885.5	1.69009e-06	5.65442e-05
C4bp	complement component 4 binding protein [Source:MGI Symbol;Acc:MGI:88229]	Up	9.59878	1.212	0	149.833	1.75997e-06	5.87413e-05
Gm17197	predicted gene 17197 [Source:MGI Symbol;Acc:MGI:4938024]	Up	9.68427	1.29393	0	149.5	1.76638e-06	5.87413e-05
Pitpnc1	phosphatidylinositol transfer protein, cytoplasmic 1 [Source:MGI Symbol;Acc:MGI:1919045]	Up	8.62568	0.289372	0	59.1667	1.77149e-06	5.87413e-05
Ccdc14	coiled-coil domain containing 14 [Source:MGI Symbol;Acc:MGI:2443448]	Up	7.94531	1.12749	0.2	116.833	1.77477e-06	5.87413e-05
Tnk2	tyrosine kinase, non-receptor, 2 [Source:MGI Symbol;Acc:MGI:1858308]	Up	1.58029	6.08397	548.4	2944	1.77771e-06	5.87413e-05
Rps4l	ribosomal protein S4-like [Source:MGI Symbol;Acc:MGI:1913434]	Down	-8.17267	4.0558	677	3.5	1.77822e-06	5.87413e-05
Ccn1	cellular communication network factor 1 [Source:MGI Symbol;Acc:MGI:88613]	Up	9.75471	1.36152	0	137	1.78999e-06	5.90059e-05
Igfbp5	insulin-like growth factor binding protein 5 [Source:MGI Symbol;Acc:MGI:96440]	Up	8.59143	1.86705	0.2	179	1.84597e-06	6.04379e-05
Nt5c	5',3'-nucleotidase, cytosolic [Source:MGI Symbol;Acc:MGI:1354954]	Up	1.51165	7.6716	1824.2	9277.67	1.84669e-06	6.04379e-05
Smpdl3a	sphingomyelin phosphodiesterase, acid-like 3A [Source:MGI Symbol;Acc:MGI:1931437]	Down	-1.45218	6.59388	2357.8	1628.5	1.84926e-06	6.04379e-05
Gltp	glycolipid transfer protein [Source:MGI Symbol;Acc:MGI:1929253]	Down	-1.24256	7.04119	3205.6	2377.83	1.84978e-06	6.04379e-05
Hsf4	heat shock transcription factor 4 [Source:MGI Symbol;Acc:MGI:1347058]	Up	9.66689	1.27689	0	131.833	1.85269e-06	6.04379e-05
TrnL2	#N/A	Up	10.4605	2.04673	0	185.333	1.8887e-06	6.14846e-05
Klhl3	kelch-like 3 [Source:MGI Symbol;Acc:MGI:2445185]	Up	9.30175	0.925373	0	85	1.93074e-06	6.2723e-05
Hoxa2	homeobox A2 [Source:MGI Symbol;Acc:MGI:96174]	Up	9.39309	1.01375	0	102.833	1.94361e-06	6.30108e-05
Clec11a	C-type lectin domain family 11, member a [Source:MGI Symbol;Acc:MGI:1298219]	Up	9.42014	1.03867	0	93.5	1.94818e-06	6.30286e-05
Nbeal2	neurobeachin-like 2 [Source:MGI Symbol;Acc:MGI:2448554]	Up	1.9933	5.74952	372.8	2297.17	1.96523e-06	6.33589e-05
Snora68	small nucleolar RNA, H/ACA box 68 [Source:MGI Symbol;Acc:MGI:2148181]	Up	9.30396	0.928194	0	95	1.96823e-06	6.33589e-05
Zfp459	zinc finger protein 459 [Source:MGI Symbol;Acc:MGI:3040701]	Up	8.96543	0.607641	0	80	1.97726e-06	6.33589e-05
D730003I15Rik	RIKEN cDNA D730003I15 gene [Source:MGI Symbol;Acc:MGI:1925971]	Up	9.62541	1.23715	0	135.167	1.97851e-06	6.33589e-05
Rac1	Rac family small GTPase 1 [Source:MGI Symbol;Acc:MGI:97845]	Down	-0.951732	8.42193	8098.6	7102.33	1.97858e-06	6.33589e-05
Pnpla1	patatin-like phospholipase domain containing 1 [Source:MGI Symbol;Acc:MGI:3617850]	Up	9.16261	0.793728	0	85	2.01077e-06	6.42586e-05
Rab11fip5	RAB11 family interacting protein 5 (class I) [Source:MGI Symbol;Acc:MGI:1098586]	Up	8.67562	0.335783	0	60.6667	2.02189e-06	6.44828e-05
Rimbp2	RIMS binding protein 2 [Source:MGI Symbol;Acc:MGI:2443235]	Up	8.8154	0.467097	0	75	2.04719e-06	6.51572e-05
Gm40572	#N/A	Up	9.1457	0.777298	0	81.1667	2.08829e-06	6.61388e-05
Itgb7	integrin beta 7 [Source:MGI Symbol;Acc:MGI:96616]	Up	9.21317	0.842209	0	92.3333	2.09314e-06	6.61388e-05
Hmgb1	high mobility group box 1 [Source:MGI Symbol;Acc:MGI:96113]	Down	-0.907369	8.52455	8754.2	7656.17	2.09386e-06	6.61388e-05
Chmp2b	charged multivesicular body protein 2B [Source:MGI Symbol;Acc:MGI:1916192]	Down	-1.31949	6.86727	3206.8	1991	2.09489e-06	6.61388e-05
9030025P20Rik	RIKEN cDNA 9030025P20 gene [Source:MGI Symbol;Acc:MGI:3583895]	Up	8.58833	0.254658	0	56.8333	2.1362e-06	6.73076e-05
Cdh24	cadherin-like 24 [Source:MGI Symbol;Acc:MGI:1928330]	Up	8.78057	0.434118	0	68.1667	2.15073e-06	6.76294e-05
Nudt4	nudix (nucleoside diphosphate linked moiety X)-type motif 4 [Source:MGI Symbol;Acc:MGI:1918457]	Down	-0.97255	8.74928	10406	8562.17	2.18777e-06	6.86567e-05
Ttl	tubulin tyrosine ligase [Source:MGI Symbol;Acc:MGI:1916987]	Up	7.87106	2.00384	0.4	217.333	2.19359e-06	6.87017e-05
4632428C04Rik	RIKEN cDNA 4632428C04 gene [Source:MGI Symbol;Acc:MGI:1921600]	Up	8.86186	0.509762	0	67.8333	2.19937e-06	6.87457e-05
Col7a1	collagen, type VII, alpha 1 [Source:MGI Symbol;Acc:MGI:88462]	Up	9.66936	1.279	0	123.5	2.25847e-06	7.04525e-05
Cdh26	cadherin-like 26 [Source:MGI Symbol;Acc:MGI:2685856]	Up	9.14081	0.773174	0	83.1667	2.29596e-06	7.14801e-05
Knop1	lysine rich nucleolar protein 1 [Source:MGI Symbol;Acc:MGI:1913606]	Down	-1.47842	6.15115	1857.6	1122	2.32793e-06	7.23318e-05
4930522L14Rik	RIKEN cDNA 4930522L14 gene [Source:MGI Symbol;Acc:MGI:1925270]	Up	9.69963	1.30786	0	134.833	2.35201e-06	7.29357e-05
Fry	FRY microtubule binding protein [Source:MGI Symbol;Acc:MGI:2443895]	Up	9.42299	1.04174	0	100.667	2.35841e-06	7.29897e-05
Gm15760	predicted gene 15760 [Source:MGI Symbol;Acc:MGI:3642834]	Up	8.78617	0.439448	0	71.8333	2.38939e-06	7.37369e-05
Retnlb	resistin like beta [Source:MGI Symbol;Acc:MGI:1888505]	Down	-2.93066	6.76292	3493.6	703.667	2.3948e-06	7.37369e-05
H2-Q2	histocompatibility 2, Q region locus 2 [Source:MGI Symbol;Acc:MGI:95931]	Down	-1.84235	6.08335	1962	822.667	2.39923e-06	7.37369e-05
Dmrta2	doublesex and mab-3 related transcription factor like family A2 [Source:MGI Symbol;Acc:MGI:2653629]	Up	8.47122	1.91352	0.2	188.167	2.40291e-06	7.37369e-05
Rpl35a	ribosomal protein L35A [Source:MGI Symbol;Acc:MGI:1928894]	Up	1.01188	9.85934	10101	37489.7	2.40642e-06	7.37369e-05
Pou4f1	POU domain, class 4, transcription factor 1 [Source:MGI Symbol;Acc:MGI:102525]	Up	8.88392	0.530265	0	66.6667	2.41075e-06	7.37369e-05
Sult1a1	sulfotransferase family 1A, phenol-preferring, member 1 [Source:MGI Symbol;Acc:MGI:102896]	Up	1.00955	9.25968	6539.4	23982.8	2.48237e-06	7.57253e-05
Smbd1	somatomedin B domain containing 1 [Source:MGI Symbol;Acc:MGI:2685779]	Up	8.91723	0.562377	0	78.8333	2.48541e-06	7.57253e-05
Pkia	protein kinase inhibitor, alpha [Source:MGI Symbol;Acc:MGI:104747]	Up	9.19943	0.828913	0	89.5	2.50442e-06	7.61566e-05
Zfp595	zinc finger protein 595 [Source:MGI Symbol;Acc:MGI:3040707]	Up	8.78189	0.43526	0	69.3333	2.56251e-06	7.77725e-05
Gramd2	GRAM domain containing 2 [Source:MGI Symbol;Acc:MGI:3528937]	Up	9.60778	1.2195	0	123.833	2.61658e-06	7.91948e-05
Hk1os	hexokinase 1, opposite strand [Source:MGI Symbol;Acc:MGI:1917412]	Up	9.37729	0.999169	0	119.833	2.61947e-06	7.91948e-05
Glmn	glomulin, FKBP associated protein [Source:MGI Symbol;Acc:MGI:2141180]	Up	9.13712	0.769728	0	84.3333	2.63195e-06	7.94191e-05
Spink4	serine peptidase inhibitor, Kazal type 4 [Source:MGI Symbol;Acc:MGI:1341848]	Up	1.19301	11.0293	20632.8	86284.8	2.63757e-06	7.94359e-05
Nexn	nexilin [Source:MGI Symbol;Acc:MGI:1916060]	Up	9.03938	0.678279	0	95.6667	2.65934e-06	7.98947e-05
Rims2	regulating synaptic membrane exocytosis 2 [Source:MGI Symbol;Acc:MGI:2152972]	Up	8.70541	0.363035	0	59	2.66299e-06	7.98947e-05
Fzd4	frizzled class receptor 4 [Source:MGI Symbol;Acc:MGI:108520]	Up	9.1147	0.748241	0	79.3333	2.69417e-06	8.0589e-05
Gm15545	predicted gene 15545 [Source:MGI Symbol;Acc:MGI:3782994]	Up	8.73734	0.393473	0	64.8333	2.6964e-06	8.0589e-05
Gm39693	#N/A	Up	9.37053	0.992837	0	120.333	2.75301e-06	8.21244e-05
Gm14321	predicted gene 14321 [Source:MGI Symbol;Acc:MGI:3701951]	Up	9.03522	0.672933	0	76.1667	2.76059e-06	8.21945e-05
Gm16008	predicted gene 16008 [Source:MGI Symbol;Acc:MGI:3802048]	Up	9.01454	0.654113	0	83.5	2.77729e-06	8.2535e-05
Amhr2	anti-Mullerian hormone type 2 receptor [Source:MGI Symbol;Acc:MGI:105062]	Up	9.33839	0.961037	0	92.6667	2.80443e-06	8.3184e-05
4930520O04Rik	RIKEN cDNA 4930520O04 gene [Source:MGI Symbol;Acc:MGI:1922366]	Up	8.98252	0.623086	0	73.5	2.83197e-06	8.38424e-05
Ppfia4	protein tyrosine phosphatase, receptor type, f polypeptide (PTPRF), interacting protein (liprin), alpha 4 [Source:MGI Symbol;Acc:MGI:1915757]	Up	9.5027	1.11835	0	107	2.8415e-06	8.39661e-05
Clk1	CDC-like kinase 1 [Source:MGI Symbol;Acc:MGI:107403]	Up	1.68353	6.24497	609	3326.67	2.86362e-06	8.44607e-05
Ppm1l	protein phosphatase 1 (formerly 2C)-like [Source:MGI Symbol;Acc:MGI:2139740]	Up	9.18526	0.815884	0	93	2.88772e-06	8.50118e-05
Prkcg	protein kinase C, gamma [Source:MGI Symbol;Acc:MGI:97597]	Up	9.27459	0.900407	0	94.3333	2.95233e-06	8.6751e-05
Zfp763	zinc finger protein 763 [Source:MGI Symbol;Acc:MGI:1920701]	Up	9.17779	0.808001	0	81.6667	2.99335e-06	8.7792e-05
Gas5	growth arrest specific 5 [Source:MGI Symbol;Acc:MGI:95659]	Up	1.25501	7.5183	1696.8	7810.33	3.00441e-06	8.79518e-05
Slc17a9	solute carrier family 17, member 9 [Source:MGI Symbol;Acc:MGI:1919107]	Up	1.67862	6.21572	571.4	3012.83	3.02949e-06	8.84795e-05
2900093K20Rik	RIKEN cDNA 2900093K20 gene [Source:MGI Symbol;Acc:MGI:1915287]	Up	8.56208	0.230261	0	56.1667	3.03371e-06	8.84795e-05
5930430L01Rik	RIKEN cDNA 5930430L01 gene [Source:MGI Symbol;Acc:MGI:2443110]	Up	8.93093	0.574439	0	70.6667	3.06188e-06	8.91353e-05
1700028J19Rik	RIKEN cDNA 1700028J19 gene [Source:MGI Symbol;Acc:MGI:1917254]	Up	9.32466	0.948477	0	106.5	3.08905e-06	8.97597e-05
Ypel1	yippee like 1 [Source:MGI Symbol;Acc:MGI:1913303]	Up	8.58332	0.249711	0	54.6667	3.12137e-06	9.03893e-05
Skp1	S-phase kinase-associated protein 1 [Source:MGI Symbol;Acc:MGI:103575]	Down	-1.40857	7.38159	4371.6	2940.67	3.12224e-06	9.03893e-05
Armcx5	armadillo repeat containing, X-linked 5 [Source:MGI Symbol;Acc:MGI:2148026]	Up	9.02577	0.66393	0	75.6667	3.15759e-06	9.11597e-05
Dync1i1	dynein cytoplasmic 1 intermediate chain 1 [Source:MGI Symbol;Acc:MGI:107743]	Up	9.33032	0.953197	0	93.3333	3.16047e-06	9.11597e-05
Dnah2	dynein, axonemal, heavy chain 2 [Source:MGI Symbol;Acc:MGI:107731]	Up	9.02648	0.664108	0	72.6667	3.18309e-06	9.16438e-05
Sez6l2	seizure related 6 homolog like 2 [Source:MGI Symbol;Acc:MGI:2385295]	Up	9.2614	0.888602	0	105.667	3.26292e-06	9.37701e-05
Gm41285	#N/A	Up	9.65372	1.26235	0	100.333	3.28267e-06	9.41652e-05
Amotl1	angiomotin-like 1 [Source:MGI Symbol;Acc:MGI:1922973]	Up	10.2956	1.88655	0	204.833	3.36483e-06	9.6346e-05
Dnal1	dynein, axonemal, light chain 1 [Source:MGI Symbol;Acc:MGI:1921462]	Up	8.76553	0.420848	0	76.6667	3.47647e-06	9.93612e-05
Awat2	acyl-CoA wax alcohol acyltransferase 2 [Source:MGI Symbol;Acc:MGI:3045345]	Up	9.39654	1.01696	0	102.5	3.56096e-06	0.000101591
Tmem63a	transmembrane protein 63a [Source:MGI Symbol;Acc:MGI:2384789]	Up	2.29528	7.42332	920.4	7918	3.58371e-06	0.000102055
Porcn	porcupine O-acyltransferase [Source:MGI Symbol;Acc:MGI:1890212]	Up	8.77634	0.429436	0	63.1667	3.61536e-06	0.000102769
Snord21	small nucleolar RNA, C/D box 21 [Source:MGI Symbol;Acc:MGI:102855]	Up	8.85473	0.502699	0	67.1667	3.62767e-06	0.000102933
Gm14167	predicted gene 14167 [Source:MGI Symbol;Acc:MGI:3651481]	Up	9.53112	1.14495	0	99.5	3.66003e-06	0.000103663
9330162012Rik	cDNA RIKEN 9330162012 gene [Source:MGI Symbol;Acc:MGI:3604449]	Up	8.64869	0.310306	0	56.3333	3.7254e-06	0.000105325
Akap17a	#N/A	Up	1.75807	6.15516	575.4	2883.17	3.74066e-06	0.000105566
LOC115488789	#N/A	Up	6.30691	1.88574	1.2	186.5	3.74996e-06	0.000105638
Gm41516	#N/A	Up	9.22729	0.854808	0	83	3.8506e-06	0.000108279
Yod1	YOD1 deubiquitinase [Source:MGI Symbol;Acc:MGI:2442596]	Up	8.53778	0.20852	0	59	3.89441e-06	0.000109222
Fbl	fibrillarin [Source:MGI Symbol;Acc:MGI:95486]	Up	1.59475	6.72399	870.8	4463.33	3.89807e-06	0.000109222
Stab1	stabilin 1 [Source:MGI Symbol;Acc:MGI:2178742]	Up	9.37451	0.995862	0	98	3.95124e-06	0.000110515
Uqcc3	ubiquinol-cytochrome c reductase complex assembly factor 3 [Source:MGI Symbol;Acc:MGI:2147553]	Up	1.62772	6.07161	611.8	2880.67	4.0107e-06	0.000111978
Msh5	mutS homolog 5 [Source:MGI Symbol;Acc:MGI:1329021]	Up	9.29311	0.917895	0	94.8333	4.05103e-06	0.000112904
Cck	cholecystokinin [Source:MGI Symbol;Acc:MGI:88297]	Up	9.16559	0.797606	0	97.6667	4.0715e-06	0.000113273
Gm52507	#N/A	Up	8.67614	0.337105	0	67.1667	4.12777e-06	0.000114526
Zbtb46	zinc finger and BTB domain containing 46 [Source:MGI Symbol;Acc:MGI:1919397]	Up	8.56565	0.234828	0	65.1667	4.13113e-06	0.000114526
Trmt61b	tRNA methyltransferase 61B [Source:MGI Symbol;Acc:MGI:1916039]	Up	9.15691	0.789435	0	103	4.19424e-06	0.000115889
Actb	actin, beta [Source:MGI Symbol;Acc:MGI:87904]	Down	-0.975361	10.943	46636.8	37881	4.20207e-06	0.000115889
Ptges	prostaglandin E synthase [Source:MGI Symbol;Acc:MGI:1927593]	Up	8.9586	0.599907	0	66.3333	4.20248e-06	0.000115889
1700123O20Rik	RIKEN cDNA 1700123O20 gene [Source:MGI Symbol;Acc:MGI:1920893]	Down	-1.88416	5.50821	1296.6	635.5	4.21716e-06	0.00011609
Angptl1	angiopoietin-like 1 [Source:MGI Symbol;Acc:MGI:1919963]	Up	8.46076	0.137529	0	58.1667	4.29413e-06	0.000118002
Rplp2	ribosomal protein, large P2 [Source:MGI Symbol;Acc:MGI:1914436]	Up	1.07738	10.4855	15480.2	58744	4.32406e-06	0.000118617
Hivep2	human immunodeficiency virus type I enhancer binding protein 2 [Source:MGI Symbol;Acc:MGI:1338076]	Down	-2.18214	5.45294	1259.4	484.333	4.34477e-06	0.000118977
Gm46241	#N/A	Up	9.20208	0.830332	0	77.5	4.38318e-06	0.000119437
C330013E15Rik	RIKEN cDNA C330013E15 gene [Source:MGI Symbol;Acc:MGI:1925695]	Up	8.47361	0.150002	0	62.1667	4.38364e-06	0.000119437
Cdk3	cyclin-dependent kinase 3 [Source:MGI Symbol;Acc:MGI:1916931]	Up	9.07986	0.714903	0	79.1667	4.39159e-06	0.000119437
Cuta	cutA divalent cation tolerance homolog [Source:MGI Symbol;Acc:MGI:1914925]	Up	1.91112	6.21476	549.2	3246.17	4.39202e-06	0.000119437
Atp5d	ATP synthase, H+ transporting, mitochondrial F1 complex, delta subunit [Source:MGI Symbol;Acc:MGI:1913293]	Up	0.852433	10.2169	14075.6	44074.8	4.47249e-06	0.000121415
Npff	neuropeptide FF-amide peptide precursor [Source:MGI Symbol;Acc:MGI:1891708]	Up	9.10765	0.74146	0	79.6667	4.50358e-06	0.000122048
Mmp7	matrix metallopeptidase 7 [Source:MGI Symbol;Acc:MGI:103189]	Up	9.6146	1.22685	0	133.667	4.53361e-06	0.00012265
Gm23803	predicted gene, 23803 [Source:MGI Symbol;Acc:MGI:5453580]	Up	8.97717	0.619186	0	89	4.59404e-06	0.000124071
Cav1	caveolin 1, caveolae protein [Source:MGI Symbol;Acc:MGI:102709]	Up	8.84534	0.493932	0	65.6667	4.66388e-06	0.00012574
Smim15	small integral membrane protein 15 [Source:MGI Symbol;Acc:MGI:1922866]	Down	-1.51047	5.74094	1431.6	844.5	4.68461e-06	0.000125871
2200002J24Rik	RIKEN cDNA 2200002J24 gene [Source:MGI Symbol;Acc:MGI:1916397]	Up	8.54141	0.211141	0	54.5	4.68478e-06	0.000125871
Fev	FEV transcription factor, ETS family member [Source:MGI Symbol;Acc:MGI:2449712]	Up	8.54359	0.213698	0	56.8333	4.71142e-06	0.000126371
Syngr2	synaptogyrin 2 [Source:MGI Symbol;Acc:MGI:1328324]	Up	1.31587	7.69714	1893.6	8391.17	4.79519e-06	0.000128398
Rnf19b	ring finger protein 19B [Source:MGI Symbol;Acc:MGI:1922484]	Down	-1.90115	5.63666	1569.4	608.667	4.8815e-06	0.000130487
Angpt2	angiopoietin 2 [Source:MGI Symbol;Acc:MGI:1202890]	Up	9.10408	0.738781	0	87.6667	4.90455e-06	0.00013088
Hoxa4	homeobox A4 [Source:MGI Symbol;Acc:MGI:96176]	Up	9.53234	1.14612	0	103.333	4.91876e-06	0.000131036
Baiap3	BAI1-associated protein 3 [Source:MGI Symbol;Acc:MGI:2685783]	Up	8.95667	0.599638	0	85	4.94056e-06	0.000131394
Gm23119	predicted gene, 23119 [Source:MGI Symbol;Acc:MGI:5452896]	Up	8.59258	0.25808	0	56.8333	4.97854e-06	0.000131992
Sv2c	synaptic vesicle glycoprotein 2c [Source:MGI Symbol;Acc:MGI:1922459]	Up	9.34562	0.967609	0	89	4.9799e-06	0.000131992
H4c14	H4 clustered histone 14 [Source:MGI Symbol;Acc:MGI:2140113]	Up	8.61295	0.277797	0	61	5.07858e-06	0.000134381
Ccdc171	coiled-coil domain containing 171 [Source:MGI Symbol;Acc:MGI:1922152]	Up	9.50643	1.12305	0	128.667	5.14294e-06	0.000135855
Gm46609	#N/A	Up	8.80194	0.454495	0	74.1667	5.16726e-06	0.000136268
Gm36220	#N/A	Up	8.77241	0.425798	0	64.6667	5.23278e-06	0.00013768
Msantd2	Myb/SANT-like DNA-binding domain containing 2 [Source:MGI Symbol;Acc:MGI:2384579]	Down	-1.9934	5.45798	1187	492	5.23836e-06	0.00013768
Gm32715	#N/A	Up	8.10722	-0.18532	0	40	5.25429e-06	0.000137868
Abca1	ATP-binding cassette, sub-family A (ABC1), member 1 [Source:MGI Symbol;Acc:MGI:99607]	Up	8.9466	0.588548	0	67.5	5.28598e-06	0.000138417
Gm38872	#N/A	Up	9.17669	0.806351	0	77.6667	5.29284e-06	0.000138417
Rps4x	ribosomal protein S4, X-linked [Source:MGI Symbol;Acc:MGI:98158]	Up	0.968199	10.3467	14986.2	51383.7	5.33256e-06	0.000139207
Ano7	anoctamin 7 [Source:MGI Symbol;Acc:MGI:3052714]	Up	2.26295	5.30688	206.8	1743.83	5.34081e-06	0.000139207
Clba1	clathrin binding box of aftiphilin containing 1 [Source:MGI Symbol;Acc:MGI:2443738]	Up	8.51682	0.187946	0	51.1667	5.44362e-06	0.000141651
Mipol1	mirror-image polydactyly 1 [Source:MGI Symbol;Acc:MGI:1920740]	Up	7.68977	0.879999	0.2	104.667	5.46335e-06	0.00014193
Cfap53	cilia and flagella associated protein 53 [Source:MGI Symbol;Acc:MGI:1921703]	Up	8.97752	0.617765	0	68.5	5.5134e-06	0.000142993
Slc12a7	solute carrier family 12, member 7 [Source:MGI Symbol;Acc:MGI:1342283]	Up	2.03156	5.6537	289.8	2199.67	5.53329e-06	0.000143272
Slc25a27	solute carrier family 25, member 27 [Source:MGI Symbol;Acc:MGI:1921261]	Up	8.76025	0.413394	0	57.3333	5.54604e-06	0.000143366
Gm39006	#N/A	Up	8.51633	0.189244	0	63.3333	5.55654e-06	0.000143401
Ltbr	lymphotoxin B receptor [Source:MGI Symbol;Acc:MGI:104875]	Up	1.21919	6.99432	1380.4	4977	5.58933e-06	0.000143913
BC024139	cDNA sequence BC024139 [Source:MGI Symbol;Acc:MGI:2442591]	Up	9.12005	0.754704	0	100.167	5.61117e-06	0.000143913
9530018F02Rik	RIKEN cDNA 9530018F02 gene [Source:MGI Symbol;Acc:MGI:1924652]	Up	8.50602	0.178901	0	57.3333	5.61276e-06	0.000143913
Muc1	mucin 1, transmembrane [Source:MGI Symbol;Acc:MGI:97231]	Up	7.33769	2.58397	1.4	316.833	5.61309e-06	0.000143913
4930578L24Rik	#N/A	Up	8.25384	-0.0516352	0	51.1667	5.62778e-06	0.000144055
Cfap74	cilia and flagella associated protein 74 [Source:MGI Symbol;Acc:MGI:1917130]	Up	9.34017	0.963443	0	102.333	5.74394e-06	0.000146789
Gm21992	predicted gene 21992 [Source:MGI Symbol;Acc:MGI:5439461]	Up	8.13416	-0.160429	0	44.6667	5.76412e-06	0.000147065
2610528A11Rik	RIKEN cDNA 2610528A11 gene [Source:MGI Symbol;Acc:MGI:1917295]	Down	-0.800726	9.37821	14833.8	14619	5.80346e-06	0.000147828
Larp4b	La ribonucleoprotein 4B [Source:MGI Symbol;Acc:MGI:106330]	Up	1.41506	7.78865	1955.2	8581.17	5.81978e-06	0.000148003
Gnrh1	gonadotropin releasing hormone 1 [Source:MGI Symbol;Acc:MGI:95789]	Up	8.7096	0.367725	0	63.1667	5.87431e-06	0.000149126
Tmem150a	transmembrane protein 150A [Source:MGI Symbol;Acc:MGI:2385244]	Up	9.01084	0.649666	0	73.8333	5.88293e-06	0.000149126
BC018473	cDNA sequence BC018473 [Source:MGI Symbol;Acc:MGI:3039625]	Up	8.52087	0.193354	0	62	5.93043e-06	0.000150088
5830416I19Rik	RIKEN cDNA 5830416I19 gene [Source:MGI Symbol;Acc:MGI:1922007]	Up	10.0537	1.65116	0	177.5	5.95237e-06	0.000150225
Gsto2	glutathione S-transferase omega 2 [Source:MGI Symbol;Acc:MGI:1915464]	Up	8.89967	0.545756	0	75.3333	5.955e-06	0.000150225
Plxna3	plexin A3 [Source:MGI Symbol;Acc:MGI:107683]	Up	9.23167	0.860524	0	103.5	5.97596e-06	0.000150512
Itgb4	integrin beta 4 [Source:MGI Symbol;Acc:MGI:96613]	Up	1.46355	6.71745	835.8	4351.83	6.01644e-06	0.000151288
Camkk1	calcium/calmodulin-dependent protein kinase kinase 1, alpha [Source:MGI Symbol;Acc:MGI:1891766]	Up	8.47126	0.145675	0	49.5	6.05768e-06	0.000152082
LOC118568027	#N/A	Up	9.25853	0.883805	0	81.3333	6.08126e-06	0.00015243
Zfp934	zinc finger protein 934 [Source:MGI Symbol;Acc:MGI:1924367]	Up	8.33748	0.0250061	0	55.3333	6.26126e-06	0.000156691
Wwp2	WW domain containing E3 ubiquitin protein ligase 2 [Source:MGI Symbol;Acc:MGI:1914144]	Up	1.23264	6.85183	1153	4451.17	6.29807e-06	0.000157361
Zmiz1os1	Zmiz1 opposite strand 1 [Source:MGI Symbol;Acc:MGI:3041228]	Up	8.48838	0.162334	0	52.1667	6.36867e-06	0.000158637
Supt5	suppressor of Ty 5, DSIF elongation factor subunit [Source:MGI Symbol;Acc:MGI:1202400]	Up	1.15279	7.00641	1330	4867.5	6.36934e-06	0.000158637
Cyp2c55	cytochrome P450, family 2, subfamily c, polypeptide 55 [Source:MGI Symbol;Acc:MGI:1919332]	Down	-1.35461	10.5021	36056.2	22750	6.40017e-06	0.000159002
Ceacam10	CEA cell adhesion molecule 10 [Source:MGI Symbol;Acc:MGI:1347248]	Up	1.74536	6.30129	559.6	3469.33	6.40639e-06	0.000159002
Lyl1	lymphoblastomic leukemia 1 [Source:MGI Symbol;Acc:MGI:96891]	Up	9.101	0.735501	0	81.5	6.42005e-06	0.000159002
Hcst	hematopoietic cell signal transducer [Source:MGI Symbol;Acc:MGI:1344360]	Up	8.57747	0.245646	0	64.8333	6.42454e-06	0.000159002
Fbxw10	F-box and WD-40 domain protein 10 [Source:MGI Symbol;Acc:MGI:3052463]	Up	8.79372	0.445428	0	64.6667	6.45155e-06	0.000159419
Sgsm3	small G protein signaling modulator 3 [Source:MGI Symbol;Acc:MGI:1916329]	Up	1.19257	6.96046	1265.8	4806.17	6.5852e-06	0.000162263
Atad5	ATPase family, AAA domain containing 5 [Source:MGI Symbol;Acc:MGI:2442925]	Up	9.46173	1.07822	0	94.5	6.59586e-06	0.000162263
Gm40310	#N/A	Up	8.59863	0.264177	0	56	6.59765e-06	0.000162263
Kcnd1	potassium voltage-gated channel, Shal-related family, member 1 [Source:MGI Symbol;Acc:MGI:96671]	Up	9.65533	1.26435	0	105.833	6.6132e-06	0.000162391
S100a10	S100 calcium binding protein A10 (calpactin) [Source:MGI Symbol;Acc:MGI:1339468]	Down	-0.961968	8.82241	11078.6	9428.83	6.66548e-06	0.000163419
Inpp4b	inositol polyphosphate-4-phosphatase, type II [Source:MGI Symbol;Acc:MGI:2158925]	Up	9.1822	0.812586	0	85.5	6.6761e-06	0.000163424
Tnfrsf23	tumor necrosis factor receptor superfamily, member 23 [Source:MGI Symbol;Acc:MGI:1930269]	Up	8.85313	0.500667	0	61.3333	6.90118e-06	0.000168671
Wdr70	WD repeat domain 70 [Source:MGI Symbol;Acc:MGI:1921020]	Down	-1.81758	5.34352	1109.4	555.167	6.98077e-06	0.000170255
AA467197	expressed sequence AA467197 [Source:MGI Symbol;Acc:MGI:3034182]	Down	-1.35201	7.54215	4815	3445	6.99264e-06	0.000170255
Gm32540	predicted gene, 32540 [Source:MGI Symbol;Acc:MGI:5591699]	Up	8.77086	0.424925	0	69.1667	6.99857e-06	0.000170255
Saa1	serum amyloid A 1 [Source:MGI Symbol;Acc:MGI:98221]	Down	-2.20623	6.51123	2680.4	1177	7.06799e-06	0.000171542
Gm31834	predicted gene, 31834 [Source:MGI Symbol;Acc:MGI:5590993]	Up	8.56915	0.236062	0	53.1667	7.07395e-06	0.000171542
Plekha3	pleckstrin homology domain-containing, family A (phosphoinositide binding specific) member 3 [Source:MGI Symbol;Acc:MGI:1932515]	Down	-1.64027	5.63439	1410	698.333	7.08426e-06	0.000171542
Pus7l	pseudouridylate synthase 7-like [Source:MGI Symbol;Acc:MGI:1926145]	Up	9.02009	0.660155	0	91.8333	7.14529e-06	0.000172753
Gnaz	guanine nucleotide binding protein, alpha z subunit [Source:MGI Symbol;Acc:MGI:95780]	Up	8.12276	-0.17099	0	44.1667	7.21683e-06	0.000174214
H4c2	H4 clustered histone 2 [Source:MGI Symbol;Acc:MGI:2448420]	Up	8.60638	0.27191	0	60	7.23188e-06	0.000174309
Gng5	G protein subunit gamma 5 [Source:MGI Symbol;Acc:MGI:109164]	Down	-1.40157	7.3091	3992.4	2829.33	7.24636e-06	0.000174391
LOC118568291	#N/A	Up	9.43342	1.05194	0	100	7.36753e-06	0.000177035
Rpl41	ribosomal protein L41 [Source:MGI Symbol;Acc:MGI:1915195]	Up	0.925912	10.5983	18425.6	60078.8	7.37884e-06	0.000177036
Gm36864	predicted gene, 36864 [Source:MGI Symbol;Acc:MGI:5596023]	Up	8.44258	0.119585	0	48.8333	7.4627e-06	0.000178434
Itgae	integrin alpha E, epithelial-associated [Source:MGI Symbol;Acc:MGI:1298377]	Up	8.22293	-0.0812268	0	41.6667	7.46476e-06	0.000178434
Junos	jun proto-oncogene, opposite strand [Source:MGI Symbol;Acc:MGI:2652837]	Up	7.85839	1.22451	0.2	107.667	7.47122e-06	0.000178434
Slc25a5	solute carrier family 25 (mitochondrial carrier, adenine nucleotide translocator), member 5 [Source:MGI Symbol;Acc:MGI:1353496]	Down	-0.841741	9.90302	21117.6	21002.3	7.52079e-06	0.000179345
Myl12b	myosin, light chain 12B, regulatory [Source:MGI Symbol;Acc:MGI:107494]	Down	-0.854761	9.23615	13989.2	13098.2	7.56799e-06	0.000180196
D630024D03Rik	RIKEN cDNA D630024D03 gene [Source:MGI Symbol;Acc:MGI:3041224]	Up	8.63233	0.294281	0	54.5	7.93455e-06	0.000188475
Sdcbp2	syndecan binding protein (syntenin) 2 [Source:MGI Symbol;Acc:MGI:2385156]	Down	-1.09654	8.24837	7339.8	5626	7.93973e-06	0.000188475
Fgf9	fibroblast growth factor 9 [Source:MGI Symbol;Acc:MGI:104723]	Up	9.0102	0.649321	0	74.1667	8.09217e-06	0.000191804
Gm5481	predicted gene 5481 [Source:MGI Symbol;Acc:MGI:3648103]	Up	7.9367	1.29913	0.2	113.5	8.1813e-06	0.000193624
Krt7	keratin 7 [Source:MGI Symbol;Acc:MGI:96704]	Up	1.04272	8.42665	3738.2	13279	8.19533e-06	0.000193664
L3hypdh	L-3-hydroxyproline dehydratase (trans-) [Source:MGI Symbol;Acc:MGI:1914467]	Up	9.03039	0.669257	0	87.5	8.22364e-06	0.000194041
Rgma	repulsive guidance molecule family member A [Source:MGI Symbol;Acc:MGI:2679262]	Up	8.83106	0.479649	0	59.8333	8.2552e-06	0.000194493
4930417H01Rik	RIKEN cDNA 4930417H01 gene [Source:MGI Symbol;Acc:MGI:3041209]	Up	9.04116	0.677526	0	70.3333	8.31253e-06	0.00019555
Rgs19	regulator of G-protein signaling 19 [Source:MGI Symbol;Acc:MGI:1915153]	Up	8.77294	0.4282	0	81	8.34897e-06	0.000196113
Igkc	immunoglobulin kappa constant [Source:MGI Symbol;Acc:MGI:96495]	Down	-2.91265	4.93994	919	223.667	8.47972e-06	0.000198887
Gm52306	#N/A	Up	8.569	0.237535	0	62.8333	8.61054e-06	0.000201654
Zmynd12	zinc finger, MYND domain containing 12 [Source:MGI Symbol;Acc:MGI:2140259]	Up	8.60236	0.26739	0	55.8333	8.65005e-06	0.000202277
Gm15441	predicted gene 15441 [Source:MGI Symbol;Acc:MGI:3641753]	Up	8.33748	0.025005	0	54.3333	8.73154e-06	0.000203879
Zfp808	zinc finger protein 808 [Source:MGI Symbol;Acc:MGI:3704127]	Up	8.90279	0.547009	0	63	9.01661e-06	0.000210222
Pkdrej	polycystin (PKD) family receptor for egg jelly [Source:MGI Symbol;Acc:MGI:1338786]	Up	8.78008	0.432001	0	59.5	9.13624e-06	0.000212696
Glrx	glutaredoxin [Source:MGI Symbol;Acc:MGI:2135625]	Down	-1.44459	6.35158	2148.6	1275.33	9.19774e-06	0.00021381
9930012K11Rik	RIKEN cDNA 9930012K11 gene [Source:MGI Symbol;Acc:MGI:2145726]	Up	9.00532	0.644652	0	79.5	9.22335e-06	0.000214088
Slit2	slit guidance ligand 2 [Source:MGI Symbol;Acc:MGI:1315205]	Up	8.57899	0.244731	0	51.5	9.40396e-06	0.000217958
Ehmt2	euchromatic histone lysine N-methyltransferase 2 [Source:MGI Symbol;Acc:MGI:2148922]	Up	1.35841	7.61254	1930	7900.5	9.59755e-06	0.000222117
Rinl	Ras and Rab interactor-like [Source:MGI Symbol;Acc:MGI:2444024]	Up	8.06192	-0.226078	0	39.5	9.80558e-06	0.000226597
Zfp280c	zinc finger protein 280C [Source:MGI Symbol;Acc:MGI:2387585]	Up	8.90997	0.555557	0	81.8333	1.00424e-05	0.000231729
Zfp729a	zinc finger protein 729a [Source:MGI Symbol;Acc:MGI:3036250]	Down	-2.36774	4.9101	847.8	321	1.00705e-05	0.000232036
Timm23	translocase of inner mitochondrial membrane 23 [Source:MGI Symbol;Acc:MGI:1858317]	Down	-1.22507	6.46023	2318.2	1565.83	1.01456e-05	0.000233423
Gm40096	#N/A	Up	7.98096	-0.297476	0	42.6667	1.01998e-05	0.000234326
Frmd6	FERM domain containing 6 [Source:MGI Symbol;Acc:MGI:2442579]	Up	8.49568	0.170229	0	61.3333	1.02619e-05	0.000235409
C2cd4a	C2 calcium-dependent domain containing 4A [Source:MGI Symbol;Acc:MGI:3645763]	Up	8.72166	0.37815	0	60.6667	1.02864e-05	0.000235626
Ifit1bl1	interferon induced protein with tetratricpeptide repeats 1B like 1 [Source:MGI Symbol;Acc:MGI:3650685]	Down	-3.05699	4.08269	570.8	123.667	1.06112e-05	0.000242712
Lrp10	low-density lipoprotein receptor-related protein 10 [Source:MGI Symbol;Acc:MGI:1929480]	Up	1.08491	7.30206	1608.8	6142.5	1.06282e-05	0.000242747
Mrgpre	MAS-related GPR, member E [Source:MGI Symbol;Acc:MGI:2441884]	Up	8.83018	0.481421	0	78	1.07867e-05	0.000246008
Spon1	spondin 1, (f-spondin) extracellular matrix protein [Source:MGI Symbol;Acc:MGI:2385287]	Up	8.60413	0.270749	0	67.3333	1.08203e-05	0.000246416
Gtf2i	general transcription factor II I [Source:MGI Symbol;Acc:MGI:1202722]	Up	1.64172	5.99797	520.2	2810.33	1.0842e-05	0.000246554
Ntn5	netrin 5 [Source:MGI Symbol;Acc:MGI:2685330]	Up	8.63968	0.302569	0	64.1667	1.11027e-05	0.000251894
Gm15927	predicted gene 15927 [Source:MGI Symbol;Acc:MGI:3801889]	Up	8.29313	-0.0169645	0	45.8333	1.1109e-05	0.000251894
Slc27a3	solute carrier family 27 (fatty acid transporter), member 3 [Source:MGI Symbol;Acc:MGI:1347358]	Up	7.34642	1.42834	0.4	154.667	1.11298e-05	0.000252002
Rassf2	Ras association (RalGDS/AF-6) domain family member 2 [Source:MGI Symbol;Acc:MGI:2442060]	Up	7.67346	-0.569407	0	32.6667	1.11673e-05	0.000252488
Tnfrsf25	tumor necrosis factor receptor superfamily, member 25 [Source:MGI Symbol;Acc:MGI:1934667]	Up	9.20244	0.831637	0	91.5	1.1327e-05	0.000255729
Mir6236	microRNA 6236 [Source:MGI Symbol;Acc:MGI:5530929]	Down	-3.71088	10.3039	33158.4	4431	1.16032e-05	0.000261588
Macroh2a1	macroH2A.1 histone [Source:MGI Symbol;Acc:MGI:1349392]	Down	-1.13432	7.95842	5913.6	4545.67	1.16903e-05	0.000263174
Taf1d	TATA-box binding protein associated factor, RNA polymerase I, D [Source:MGI Symbol;Acc:MGI:1922566]	Down	-1.30531	6.58096	2330.2	1599	1.18283e-05	0.0002659
Cd37	CD37 antigen [Source:MGI Symbol;Acc:MGI:88330]	Up	8.8919	0.539443	0	82	1.18663e-05	0.000266304
Rnasel	ribonuclease L (2', 5'-oligoisoadenylate synthetase-dependent) [Source:MGI Symbol;Acc:MGI:1098272]	Down	-1.03663	7.9	5768	4650.67	1.18928e-05	0.000266304
Cavin4	caveolae associated 4 [Source:MGI Symbol;Acc:MGI:1915266]	Up	7.82412	-0.437877	0	33.1667	1.18972e-05	0.000266304
Mia3	MIA SH3 domain ER export factor 3 [Source:MGI Symbol;Acc:MGI:2443183]	Up	1.42876	6.23079	687.4	3007.33	1.19274e-05	0.00026652
Gm46687	#N/A	Up	9.71416	1.32025	0	100.333	1.19408e-05	0.00026652
Niban1	niban apoptosis regulator 1 [Source:MGI Symbol;Acc:MGI:2137237]	Down	-1.8221	6.04176	1980.4	869.667	1.23498e-05	0.000275257
4930524J08Rik	#N/A	Up	8.63897	0.301818	0	61.6667	1.24259e-05	0.000276234
5830454E08Rik	RIKEN cDNA 5830454E08 gene [Source:MGI Symbol;Acc:MGI:1923350]	Up	9.18476	0.816794	0	116.167	1.24288e-05	0.000276234
Igfn1	immunoglobulin-like and fibronectin type III domain containing 1 [Source:MGI Symbol;Acc:MGI:3045352]	Up	8.46014	0.138279	0	64.1667	1.25729e-05	0.000279039
H2az1	H2A.Z variant histone 1 [Source:MGI Symbol;Acc:MGI:1888388]	Down	-1.24088	7.09785	3415.4	2554.83	1.26318e-05	0.000279597
Zan	zonadhesin [Source:MGI Symbol;Acc:MGI:106656]	Up	1.99674	5.47854	261.2	2093	1.26336e-05	0.000279597
Tmem14a	transmembrane protein 14A [Source:MGI Symbol;Acc:MGI:1922962]	Up	8.58234	0.251024	0	71	1.27101e-05	0.000280894
Gm40260	#N/A	Up	8.42845	0.108092	0	55.6667	1.28037e-05	0.000282278
Nlrc5	NLR family, CARD domain containing 5 [Source:MGI Symbol;Acc:MGI:3612191]	Up	8.03269	-0.252883	0	37	1.28124e-05	0.000282278
Tmem94	transmembrane protein 94 [Source:MGI Symbol;Acc:MGI:1919197]	Up	1.57858	6.24002	607	3145.67	1.28267e-05	0.000282278
Ramac	RNA guanine-7 methyltransferase activating subunit [Source:MGI Symbol;Acc:MGI:1914398]	Down	-1.87274	5.68955	1586.2	702.167	1.30563e-05	0.000286929
Pdzd4	PDZ domain containing 4 [Source:MGI Symbol;Acc:MGI:2443483]	Up	9.27697	0.902783	0	94.3333	1.32829e-05	0.000291247
Alad	aminolevulinate, delta-, dehydratase [Source:MGI Symbol;Acc:MGI:96853]	Up	1.12557	6.79338	1152.2	4170.83	1.329e-05	0.000291247
Atp11c	ATPase, class VI, type 11C [Source:MGI Symbol;Acc:MGI:1859661]	Up	9.47949	1.09776	0	138.667	1.34278e-05	0.000293858
Gm30068	#N/A	Up	8.19299	-0.106191	0	52.8333	1.36333e-05	0.000297797
Mprip	myosin phosphatase Rho interacting protein [Source:MGI Symbol;Acc:MGI:1349438]	Up	1.76908	7.19087	920.6	6057.17	1.36556e-05	0.000297797
Cpsf1	cleavage and polyadenylation specific factor 1 [Source:MGI Symbol;Acc:MGI:2679722]	Up	1.62313	5.34173	321	1682.17	1.36647e-05	0.000297797
Gm32980	#N/A	Up	7.54593	0.92452	0.2	90	1.37286e-05	0.000298773
Gm32703	#N/A	Up	8.48793	0.160106	0	47.1667	1.37646e-05	0.000299141
2900052L18Rik	RIKEN cDNA 2900052L18 gene [Source:MGI Symbol;Acc:MGI:1924085]	Up	9.22059	0.848259	0	83	1.39367e-05	0.000302462
Slc4a2	solute carrier family 4 (anion exchanger), member 2 [Source:MGI Symbol;Acc:MGI:109351]	Up	1.28086	7.44005	1720.2	6469.17	1.43376e-05	0.000310735
Il12rb2	interleukin 12 receptor, beta 2 [Source:MGI Symbol;Acc:MGI:1270861]	Up	7.7055	1.17555	0.2	112.667	1.43632e-05	0.000310859
Gm40636	#N/A	Up	8.5698	0.237107	0	53	1.4442e-05	0.000312133
Bak1	BCL2-antagonist/killer 1 [Source:MGI Symbol;Acc:MGI:1097161]	Down	-1.03631	8.10043	6764	5204.83	1.44763e-05	0.000312446
LOC115487097	#N/A	Up	7.47324	0.791351	0.2	81.6667	1.45195e-05	0.000312947
Metap2	methionine aminopeptidase 2 [Source:MGI Symbol;Acc:MGI:1929701]	Down	-0.950533	7.1465	3343.4	2857.67	1.48092e-05	0.000318753
Ppp2r3a	protein phosphatase 2, regulatory subunit B'', alpha [Source:MGI Symbol;Acc:MGI:2442104]	Down	-1.85691	5.88435	1502.2	735	1.48334e-05	0.000318837
Gm31597	predicted gene, 31597 [Source:MGI Symbol;Acc:MGI:5590756]	Up	8.82062	0.472108	0	74.3333	1.50652e-05	0.000323375
Cdkl3	cyclin-dependent kinase-like 3 [Source:MGI Symbol;Acc:MGI:2388268]	Up	9.20217	0.832318	0	101.5	1.52759e-05	0.000327452
Fryl	FRY like transcription coactivator [Source:MGI Symbol;Acc:MGI:1919563]	Up	1.82347	5.8037	405.6	2375.33	1.53059e-05	0.000327647
Gm15848	predicted gene 15848 [Source:MGI Symbol;Acc:MGI:3802054]	Up	6.54026	1.12996	0.6	107	1.53812e-05	0.00032881
Lrat	lecithin-retinol acyltransferase (phosphatidylcholine-retinol-O-acyltransferase) [Source:MGI Symbol;Acc:MGI:1891259]	Up	9.14552	0.777068	0	77.5	1.56172e-05	0.000333401
Gm38882	#N/A	Up	8.09894	-0.19183	0	43.8333	1.5687e-05	0.000334436
Prkcsh	protein kinase C substrate 80K-H [Source:MGI Symbol;Acc:MGI:107877]	Up	1.29476	7.02211	1214.2	5291.83	1.59183e-05	0.000338907
Irf3	interferon regulatory factor 3 [Source:MGI Symbol;Acc:MGI:1859179]	Up	1.51664	6.33392	731.8	3425.67	1.5969e-05	0.000339465
H3c1	H3 clustered histone 1 [Source:MGI Symbol;Acc:MGI:2668828]	Up	9.10992	0.745087	0	98.6667	1.59946e-05	0.000339465
LOC118567670	#N/A	Up	7.2617	2.126	0.8	209.833	1.60094e-05	0.000339465
Tecpr1	tectonin beta-propeller repeat containing 1 [Source:MGI Symbol;Acc:MGI:1917631]	Up	1.75654	6.15315	524.2	2943.83	1.60918e-05	0.00034075
Rad52	RAD52 homolog, DNA repair protein [Source:MGI Symbol;Acc:MGI:101949]	Up	6.88348	3.0835	3	493.833	1.61263e-05	0.000341022
Anapc5	anaphase-promoting complex subunit 5 [Source:MGI Symbol;Acc:MGI:1929722]	Up	1.05551	7.55884	2116.2	7225.83	1.62101e-05	0.000342332
Nme1	NME/NM23 nucleoside diphosphate kinase 1 [Source:MGI Symbol;Acc:MGI:97355]	Up	1.3882	6.9981	1201	5223.67	1.63215e-05	0.000344221
Tmprss7	transmembrane serine protease 7 [Source:MGI Symbol;Acc:MGI:2686594]	Up	8.21124	-0.089696	0	50.5	1.64342e-05	0.000346133
LOC105244755	#N/A	Up	7.78977	-0.468198	0	34.1667	1.65819e-05	0.000348776
Wfdc17	WAP four-disulfide core domain 17 [Source:MGI Symbol;Acc:MGI:3649773]	Up	9.59431	1.20744	0	145.333	1.66872e-05	0.00035052
Nadk	NAD kinase [Source:MGI Symbol;Acc:MGI:2183149]	Down	-0.899095	7.64308	4572.8	4096.83	1.68617e-05	0.000353712
7530428D23Rik	RIKEN cDNA 7530428D23 gene [Source:MGI Symbol;Acc:MGI:2442162]	Up	9.54363	1.1596	0	150.167	1.69888e-05	0.000355902
Dok4	docking protein 4 [Source:MGI Symbol;Acc:MGI:2148865]	Down	-1.32683	6.07984	1844	1141	1.73875e-05	0.00036377
Gm46294	#N/A	Up	7.23274	0.627058	0.2	74.8333	1.74594e-05	0.000364789
Chmp3	charged multivesicular body protein 3 [Source:MGI Symbol;Acc:MGI:1913950]	Down	-0.941005	7.65629	4613	4204.67	1.79947e-05	0.000375472
Ces2c	carboxylesterase 2C [Source:MGI Symbol;Acc:MGI:2385905]	Down	-1.97349	6.24981	2182	845.833	1.80799e-05	0.000376288
Gm52687	#N/A	Up	7.99938	-0.281287	0	40.8333	1.80818e-05	0.000376288
4933407K13Rik	RIKEN cDNA 4933407K13 gene [Source:MGI Symbol;Acc:MGI:1921646]	Up	8.48309	0.157927	0	56	1.82995e-05	0.000379882
Acaa1a	acetyl-Coenzyme A acyltransferase 1A [Source:MGI Symbol;Acc:MGI:2148491]	Up	1.07256	7.44177	1930.2	6547.17	1.83029e-05	0.000379882
Fam110b	family with sequence similarity 110, member B [Source:MGI Symbol;Acc:MGI:1916593]	Up	8.30492	-0.00698117	0	43.6667	1.84221e-05	0.000381851
Casp7	caspase 7 [Source:MGI Symbol;Acc:MGI:109383]	Down	-1.19363	6.69886	2566.6	1907	1.87744e-05	0.000388639
Mtch1	mitochondrial carrier 1 [Source:MGI Symbol;Acc:MGI:1929261]	Up	0.950057	8.08235	3176.4	10260	1.88364e-05	0.00038941
Gm31349	#N/A	Up	7.15854	2.00106	1	190.333	1.89429e-05	0.000390603
Ugt1a7c	UDP glucuronosyltransferase 1 family, polypeptide A7C [Source:MGI Symbol;Acc:MGI:3032636]	Down	-1.63126	6.59763	2542.4	1316.67	1.89632e-05	0.000390603
Star	steroidogenic acute regulatory protein [Source:MGI Symbol;Acc:MGI:102760]	Up	9.09826	0.733378	0	92.1667	1.89688e-05	0.000390603
Zscan20	zinc finger and SCAN domains 20 [Source:MGI Symbol;Acc:MGI:2679268]	Up	7.31312	1.46971	0.4	162.5	1.90269e-05	0.000391287
Gm35437	#N/A	Up	8.89085	0.539042	0	90.8333	1.90559e-05	0.00039137
Fancb	Fanconi anemia, complementation group B [Source:MGI Symbol;Acc:MGI:2448558]	Up	8.84186	0.492056	0	76	1.91873e-05	0.000393553
LOC118568508	#N/A	Up	7.31717	0.70971	0.2	90.3333	1.9281e-05	0.000394959
Cyp2d37-ps	cytochrome P450, family 2, subfamily d, polypeptide 37, pseudogene [Source:MGI Symbol;Acc:MGI:3721937]	Up	8.81836	0.469575	0	69	1.93201e-05	0.000395244
Dnase1	deoxyribonuclease I [Source:MGI Symbol;Acc:MGI:103157]	Up	8.01071	-0.272964	0	36.6667	1.95813e-05	0.000400065
Snph	syntaphilin [Source:MGI Symbol;Acc:MGI:2139270]	Up	9.6122	1.22415	0	120	1.96708e-05	0.000401372
Gda	guanine deaminase [Source:MGI Symbol;Acc:MGI:95678]	Down	-2.06062	5.64654	1406.4	558.5	1.9765e-05	0.000402769
Itpkc	inositol 1,4,5-trisphosphate 3-kinase C [Source:MGI Symbol;Acc:MGI:2442554]	Down	-2.39083	4.33337	612	187.5	1.97965e-05	0.000402888
Hgfac	hepatocyte growth factor activator [Source:MGI Symbol;Acc:MGI:1859281]	Up	1.25663	8.08746	2428.8	11004.8	1.98532e-05	0.000403518
Ppp1r14a	protein phosphatase 1, regulatory inhibitor subunit 14A [Source:MGI Symbol;Acc:MGI:1931139]	Up	8.00077	-0.28196	0	35.8333	2.03572e-05	0.000413228
E230001N04Rik	RIKEN cDNA E230001N04 gene [Source:MGI Symbol;Acc:MGI:2443549]	Up	8.36561	0.0501458	0	51.3333	2.05878e-05	0.000417369
Mgam	maltase-glucoamylase [Source:MGI Symbol;Acc:MGI:1203495]	Up	0.948807	8.17297	3117.6	10611.3	2.07929e-05	0.000420341
Chd3	chromodomain helicase DNA binding protein 3 [Source:MGI Symbol;Acc:MGI:1344395]	Down	-1.46747	6.83669	2904.2	1766.5	2.08065e-05	0.000420341
LOC118568571	#N/A	Up	8.09538	-0.195158	0	44	2.08148e-05	0.000420341
LOC118568795	#N/A	Up	9.17625	0.805697	0	77.6667	2.09813e-05	0.000423158
Cycs	cytochrome c, somatic [Source:MGI Symbol;Acc:MGI:88578]	Down	-1.05341	8.51604	8709.2	6935.5	2.10482e-05	0.000423963
Rnft2	ring finger protein, transmembrane 2 [Source:MGI Symbol;Acc:MGI:2442859]	Up	8.20916	-0.0939579	0	42	2.15255e-05	0.000432542
1700029I15Rik	RIKEN cDNA 1700029I15 gene [Source:MGI Symbol;Acc:MGI:1916742]	Up	8.6639	0.325076	0	59.5	2.15293e-05	0.000432542
Muc3a	mucin 3A, cell surface associated [Source:MGI Symbol;Acc:MGI:3588263]	Up	1.40803	7.68397	1696	7990	2.17453e-05	0.000436324
Neu2	neuraminidase 2 [Source:MGI Symbol;Acc:MGI:1344417]	Up	7.82529	-0.434845	0	40.1667	2.18043e-05	0.000436949
Scin	scinderin [Source:MGI Symbol;Acc:MGI:1306794]	Down	-1.25496	6.78007	2772.6	1912.5	2.19679e-05	0.000439667
Itpr3	inositol 1,4,5-triphosphate receptor 3 [Source:MGI Symbol;Acc:MGI:96624]	Up	1.66805	6.14208	549.8	2995.33	2.20948e-05	0.000441643
LOC118567855	#N/A	Up	8.42695	0.105642	0	51	2.2338e-05	0.000445935
Macc1	metastasis associated in colon cancer 1 [Source:MGI Symbol;Acc:MGI:2685113]	Up	7.93308	2.07683	0.4	232.667	2.26669e-05	0.000451927
Gimap4	GTPase, IMAP family member 4 [Source:MGI Symbol;Acc:MGI:1349656]	Up	8.25058	-0.0549515	0	46.1667	2.27209e-05	0.000452428
Eva1b	eva-1 homolog B (C. elegans) [Source:MGI Symbol;Acc:MGI:1922063]	Up	7.67392	1.81903	0.4	160.667	2.27795e-05	0.000453021
Zfp599	zinc finger protein 599 [Source:MGI Symbol;Acc:MGI:2679006]	Up	9.65279	1.26173	0	104.167	2.31192e-05	0.000459194
Gm15860	predicted gene 15860 [Source:MGI Symbol;Acc:MGI:3801778]	Up	8.26383	-0.0446986	0	42.6667	2.31765e-05	0.000459651
1700110K17Rik	RIKEN cDNA 1700110K17 gene [Source:MGI Symbol;Acc:MGI:1920808]	Up	8.63356	0.296379	0	58.8333	2.32008e-05	0.000459651
Gm45095	predicted gene 45095 [Source:MGI Symbol;Acc:MGI:5753671]	Down	-6.50705	2.67577	222.2	3.16667	2.32328e-05	0.000459705
1500015A07Rik	RIKEN cDNA 1500015A07 gene [Source:MGI Symbol;Acc:MGI:1916232]	Up	7.34286	0.734146	0.2	79.3333	2.33332e-05	0.000460617
Gm35312	#N/A	Up	7.27714	0.606384	0.2	71	2.33376e-05	0.000460617
Vps16	VSP16 CORVET/HOPS core subunit [Source:MGI Symbol;Acc:MGI:2136772]	Up	1.97807	6.06299	377.4	2850.67	2.34207e-05	0.000461676
Gm17160	predicted gene 17160 [Source:MGI Symbol;Acc:MGI:4937987]	Up	8.30177	-0.00951752	0	45.1667	2.35427e-05	0.000463499
Fgr	FGR proto-oncogene, Src family tyrosine kinase [Source:MGI Symbol;Acc:MGI:95527]	Up	8.76026	0.413957	0	59	2.38095e-05	0.000468163
Huwe1	HECT, UBA and WWE domain containing 1 [Source:MGI Symbol;Acc:MGI:1926884]	Up	2.00921	6.33094	516.4	3490.5	2.41796e-05	0.000474846
Gm40399	#N/A	Up	8.67855	0.339266	0	63.5	2.45869e-05	0.000481927
Kif5b	kinesin family member 5B [Source:MGI Symbol;Acc:MGI:1098268]	Down	-0.976232	7.29962	3572	3139.33	2.46016e-05	0.000481927
Rps11	ribosomal protein S11 [Source:MGI Symbol;Acc:MGI:1351329]	Up	1.04201	7.07557	1440.6	5325	2.46511e-05	0.000482233
Car1	carbonic anhydrase 1 [Source:MGI Symbol;Acc:MGI:88268]	Down	-1.87507	13.1721	259492	110378	2.46787e-05	0.000482233
Ccnd2	cyclin D2 [Source:MGI Symbol;Acc:MGI:88314]	Up	1.2323	8.11528	2533.6	11502.7	2.48238e-05	0.000484466
Qsox1	quiescin Q6 sulfhydryl oxidase 1 [Source:MGI Symbol;Acc:MGI:1330818]	Up	1.15299	7.31993	1760.6	6201	2.4901e-05	0.000485369
Tedc2	tubulin epsilon and delta complex 2 [Source:MGI Symbol;Acc:MGI:1919266]	Up	9.59318	1.20541	0	118.833	2.50326e-05	0.000487327
1700016K05Rik	RIKEN cDNA 1700016K05 gene [Source:MGI Symbol;Acc:MGI:1922794]	Up	8.78694	0.440393	0	69.8333	2.51186e-05	0.000488396
LOC118568020	#N/A	Up	8.43876	0.117052	0	57.3333	2.54882e-05	0.000494969
Nxf1	nuclear RNA export factor 1 [Source:MGI Symbol;Acc:MGI:1858330]	Up	1.32723	5.9752	595	2480.33	2.57279e-05	0.000499006
Ghitm	growth hormone inducible transmembrane protein [Source:MGI Symbol;Acc:MGI:1913342]	Down	-0.904551	8.05824	6241.4	5595.17	2.59944e-05	0.000503554
Dnmt3b	DNA methyltransferase 3B [Source:MGI Symbol;Acc:MGI:1261819]	Up	8.37588	0.0594037	0	54.8333	2.6051e-05	0.000504027
Fbln1	fibulin 1 [Source:MGI Symbol;Acc:MGI:95487]	Up	10.2662	1.8585	0	215.667	2.61705e-05	0.000505189
Plekhb2	pleckstrin homology domain containing, family B (evectins) member 2 [Source:MGI Symbol;Acc:MGI:2385825]	Down	-0.958526	8.07703	6528.8	5418.33	2.61754e-05	0.000505189
2700054A10Rik	RIKEN cDNA 2700054A10 gene [Source:MGI Symbol;Acc:MGI:1919828]	Up	9.08234	0.718782	0	96.3333	2.64947e-05	0.000510142
Gm52344	#N/A	Up	7.87275	-0.395182	0	34.6667	2.64971e-05	0.000510142
1810019D21Rik	RIKEN cDNA 1810019D21 gene [Source:MGI Symbol;Acc:MGI:1917021]	Up	6.64851	4.15053	8	918.667	2.67886e-05	0.000515123
Smap1	small ArfGAP 1 [Source:MGI Symbol;Acc:MGI:2138261]	Down	-1.3809	6.18095	1933.2	1154.67	2.69852e-05	0.00051822
LOC118568595	#N/A	Up	7.2327	-0.946454	0	22	2.70167e-05	0.00051822
Gm35558	predicted gene, 35558 [Source:MGI Symbol;Acc:MGI:5594717]	Down	-2.26156	5.00126	1009.8	304	2.70488e-05	0.00051822
H2-Ke6	H2-K region expressed gene 6 [Source:MGI Symbol;Acc:MGI:95911]	Up	1.66638	6.45672	648.8	3686.5	2.72604e-05	0.00052133
Calm3	calmodulin 3 [Source:MGI Symbol;Acc:MGI:103249]	Down	-0.784176	9.18197	12976.4	12963.3	2.72775e-05	0.00052133
Gm13420	predicted gene 13420 [Source:MGI Symbol;Acc:MGI:3649917]	Up	7.88385	1.35816	0.2	109	2.73524e-05	0.000522124
Actr3	ARP3 actin-related protein 3 [Source:MGI Symbol;Acc:MGI:1921367]	Down	-0.961496	7.92359	5547.8	4820.17	2.74176e-05	0.000522732
Rab27a	RAB27A, member RAS oncogene family [Source:MGI Symbol;Acc:MGI:1861441]	Down	-1.38137	5.85516	1404.6	976.833	2.75403e-05	0.000524435
9330151L19Rik	RIKEN cDNA 9330151L19 gene [Source:MGI Symbol;Acc:MGI:3041168]	Up	8.29973	-0.0112828	0	46.8333	2.79479e-05	0.000531553
Gm39170	#N/A	Up	8.37347	0.0558771	0	50	2.87128e-05	0.000545439
Abi1	abl interactor 1 [Source:MGI Symbol;Acc:MGI:104913]	Down	-1.17482	6.20455	1845.4	1336.33	2.91196e-05	0.000552498
Syt7	synaptotagmin VII [Source:MGI Symbol;Acc:MGI:1859545]	Down	-1.19118	8.12503	6529.6	5010.83	2.93436e-05	0.000556076
Urb2	URB2 ribosome biogenesis 2 homolog (S. cerevisiae) [Source:MGI Symbol;Acc:MGI:2681124]	Up	6.98475	2.38921	1.6	251.667	2.96015e-05	0.000560286
Cisd3	CDGSH iron sulfur domain 3 [Source:MGI Symbol;Acc:MGI:101788]	Up	0.997001	8.77419	4965	15755.3	2.97086e-05	0.000561636
Ybx3	Y box protein 3 [Source:MGI Symbol;Acc:MGI:2137670]	Down	-0.921525	8.65088	9753	8233.17	3.02565e-05	0.000571305
Pdap1	PDGFA associated protein 1 [Source:MGI Symbol;Acc:MGI:2448536]	Down	-1.02695	7.29137	3735.4	3057.17	3.04943e-05	0.000575103
Gm16685	predicted gene, 16685 [Source:MGI Symbol;Acc:MGI:4439609]	Up	9.04814	0.683637	0	69	3.0799e-05	0.000580153
St14	suppression of tumorigenicity 14 (colon carcinoma) [Source:MGI Symbol;Acc:MGI:1338881]	Up	0.959334	8.5024	4233.2	13557.7	3.11468e-05	0.000586001
D17H6S56E-5	#N/A	Up	1.23408	7.07862	1285.4	5417	3.16756e-05	0.000595237
Septin5	septin 5 [Source:MGI Symbol;Acc:MGI:1195461]	Down	-1.22278	7.16695	3640.6	2430	3.24426e-05	0.00060892
Pex7	peroxisomal biogenesis factor 7 [Source:MGI Symbol;Acc:MGI:1321392]	Down	-1.60093	5.30955	1047.4	627	3.29787e-05	0.000617937
Ier2	immediate early response 2 [Source:MGI Symbol;Acc:MGI:104815]	Up	1.23902	7.27329	1427.6	6439.5	3.30018e-05	0.000617937
Lypla1	lysophospholipase 1 [Source:MGI Symbol;Acc:MGI:1344588]	Down	-1.54167	6.86393	3243.2	1738.33	3.35702e-05	0.000627831
Prrc2a	proline-rich coiled-coil 2A [Source:MGI Symbol;Acc:MGI:1915467]	Up	1.25325	7.11986	1279.2	5400.67	3.41007e-05	0.00063689
Eif3f	eukaryotic translation initiation factor 3, subunit F [Source:MGI Symbol;Acc:MGI:1913335]	Up	0.909143	8.71394	4811.2	15942.2	3.41358e-05	0.00063689
Dnajb13	DnaJ heat shock protein family (Hsp40) member B13 [Source:MGI Symbol;Acc:MGI:1916637]	Up	8.21517	-0.0881816	0	43	3.46685e-05	0.000646061
Abcc3	ATP-binding cassette, sub-family C (CFTR/MRP), member 3 [Source:MGI Symbol;Acc:MGI:1923658]	Up	1.15976	6.91764	1249.4	4567.33	3.50734e-05	0.00065283
Trmt1	tRNA methyltransferase 1 [Source:MGI Symbol;Acc:MGI:1289155]	Up	1.11767	6.5486	986.8	3761.67	3.53504e-05	0.000657207
Gm34006	predicted gene, 34006 [Source:MGI Symbol;Acc:MGI:5593165]	Up	7.84632	-0.418004	0	36.1667	3.56313e-05	0.000661646
LOC114841036	#N/A	Up	8.13016	-0.166281	0	37.1667	3.61544e-05	0.000670566
Rnf11	ring finger protein 11 [Source:MGI Symbol;Acc:MGI:1352759]	Down	-1.35364	5.71494	1302.2	904	3.62253e-05	0.000671087
Abcg8	ATP binding cassette subfamily G member 8 [Source:MGI Symbol;Acc:MGI:1914720]	Up	7.58485	0.968374	0.2	110	3.6488e-05	0.000675157
Gm33655	#N/A	Up	8.23693	-0.0694799	0	40.8333	3.67118e-05	0.000677906
Zfp286os	zinc finger protein 286, opposite strand [Source:MGI Symbol;Acc:MGI:3650267]	Up	8.99056	0.631289	0	76.1667	3.67229e-05	0.000677906
Ace3	angiotensin I converting enzyme (peptidyl-dipeptidase A) 3 [Source:MGI Symbol;Acc:MGI:3644400]	Up	7.77129	-0.484965	0	31.1667	3.71885e-05	0.000685694
Gm6525	predicted pseudogene 6525 [Source:MGI Symbol;Acc:MGI:3648757]	Up	7.97381	-0.304552	0	37.8333	3.73621e-05	0.000688086
Safb	scaffold attachment factor B [Source:MGI Symbol;Acc:MGI:2146974]	Up	1.33836	6.54925	935.4	3818.5	3.75381e-05	0.000690517
Macir	macrophage immunometabolism regulator [Source:MGI Symbol;Acc:MGI:1277184]	Down	-1.31623	5.89007	1492.6	1019.67	3.77585e-05	0.000693758
Gm33153	#N/A	Up	7.12702	1.37106	0.4	117.333	3.78162e-05	0.000694005
Xab2	XPA binding protein 2 [Source:MGI Symbol;Acc:MGI:1914689]	Up	1.25869	6.05768	663	2595.17	3.86803e-05	0.000709034
Vdac1	voltage-dependent anion channel 1 [Source:MGI Symbol;Acc:MGI:106919]	Down	-0.81377	8.34916	7341.2	7050	3.93923e-05	0.000721241
Cd63	CD63 antigen [Source:MGI Symbol;Acc:MGI:99529]	Up	0.884338	9.08213	6201.2	20641.8	3.97106e-05	0.000726222
Tep1	telomerase associated protein 1 [Source:MGI Symbol;Acc:MGI:109573]	Up	1.61021	6.31552	680.2	3352.83	3.98201e-05	0.000727377
Adgrf5	adhesion G protein-coupled receptor F5 [Source:MGI Symbol;Acc:MGI:2182928]	Up	7.58021	-0.65111	0	27.3333	4.00998e-05	0.000731636
2510002D24Rik	RIKEN cDNA 2510002D24 gene [Source:MGI Symbol;Acc:MGI:1919557]	Down	-1.21257	6.19015	1812	1378	4.01801e-05	0.000732248
Itga10	integrin, alpha 10 [Source:MGI Symbol;Acc:MGI:2153482]	Up	8.66833	0.327867	0	55.3333	4.07203e-05	0.000741233
Gm32652	#N/A	Up	8.07833	-0.211993	0	39.1667	4.08721e-05	0.000743133
Col11a2	collagen, type XI, alpha 2 [Source:MGI Symbol;Acc:MGI:88447]	Up	7.84355	-0.420723	0	33	4.10741e-05	0.000745827
Gm16174	predicted gene 16174 [Source:MGI Symbol;Acc:MGI:3801857]	Up	8.43856	0.118492	0	64.1667	4.11589e-05	0.000745827
Akap8l	A kinase (PRKA) anchor protein 8-like [Source:MGI Symbol;Acc:MGI:1860606]	Up	3.95532	5.65986	98.2	2601.17	4.11629e-05	0.000745827
LOC118568604	#N/A	Up	8.16883	-0.13143	0	38.1667	4.14319e-05	0.000749584
2500002B13Rik	RIKEN cDNA 2500002B13 gene [Source:MGI Symbol;Acc:MGI:1925603]	Up	7.34682	-0.851519	0	22.1667	4.14658e-05	0.000749584
Atp13a1	ATPase type 13A1 [Source:MGI Symbol;Acc:MGI:2180801]	Up	1.84454	5.89922	453.8	2609.83	4.17089e-05	0.000753112
Son	Son DNA binding protein [Source:MGI Symbol;Acc:MGI:98353]	Up	1.554	7.93003	1911.8	9711.17	4.17614e-05	0.000753192
Mtdh	metadherin [Source:MGI Symbol;Acc:MGI:1914404]	Down	-1.0651	7.00229	3085.8	2492.17	4.18209e-05	0.0007534
Hvcn1	hydrogen voltage-gated channel 1 [Source:MGI Symbol;Acc:MGI:1921346]	Up	8.09741	-0.195261	0	36.8333	4.19977e-05	0.000755717
Arhgef10	Rho guanine nucleotide exchange factor (GEF) 10 [Source:MGI Symbol;Acc:MGI:2444453]	Up	8.50897	0.180146	0	48.5	4.22985e-05	0.000760259
Slc9a3r1	solute carrier family 9 (sodium/hydrogen exchanger), member 3 regulator 1 [Source:MGI Symbol;Acc:MGI:1349482]	Down	-1.11481	7.71697	5334.4	3787	4.23584e-05	0.000760463
Nupr1	nuclear protein transcription regulator 1 [Source:MGI Symbol;Acc:MGI:1891834]	Up	1.31173	9.41249	6959.4	26337	4.27625e-05	0.000766841
Adcy3	adenylate cyclase 3 [Source:MGI Symbol;Acc:MGI:99675]	Up	8.66864	0.328575	0	55.6667	4.28838e-05	0.000768139
Adcy6	adenylate cyclase 6 [Source:MGI Symbol;Acc:MGI:87917]	Up	1.6191	6.82769	909.8	4724.33	4.30745e-05	0.000770676
Arpc4	actin related protein 2/3 complex, subunit 4 [Source:MGI Symbol;Acc:MGI:1915339]	Down	-1.08323	6.85675	2964	2246.33	4.36356e-05	0.000779825
Gamt	guanidinoacetate methyltransferase [Source:MGI Symbol;Acc:MGI:1098221]	Up	9.04534	0.681261	0	68.5	4.4423e-05	0.000792994
Eml5	echinoderm microtubule associated protein like 5 [Source:MGI Symbol;Acc:MGI:2442513]	Up	7.96728	-0.307754	0	47.5	4.62768e-05	0.000825147
Mpv17l2	MPV17 mitochondrial membrane protein-like 2 [Source:MGI Symbol;Acc:MGI:2681846]	Up	1.2035	6.52575	869.4	3650.83	4.80634e-05	0.00085548
Nr1h4	nuclear receptor subfamily 1, group H, member 4 [Source:MGI Symbol;Acc:MGI:1352464]	Down	-1.06337	6.78999	2689.2	2082.67	4.8087e-05	0.00085548
Eri3	exoribonuclease 3 [Source:MGI Symbol;Acc:MGI:2153887]	Up	1.47326	5.89871	508.6	2539.5	4.83712e-05	0.000859561
Pde6a	phosphodiesterase 6A, cGMP-specific, rod, alpha [Source:MGI Symbol;Acc:MGI:97524]	Up	7.96113	-0.3175	0	33.8333	4.86187e-05	0.000862982
Gm40446	#N/A	Up	9.66787	1.27967	0	174.333	4.91907e-05	0.000872148
Gm35402	#N/A	Up	7.955	-0.319952	0	42	4.92826e-05	0.000872792
A230083G16Rik	RIKEN cDNA A230083G16 gene [Source:MGI Symbol;Acc:MGI:3045289]	Up	8.31934	0.00632618	0	43.5	4.97371e-05	0.000879847
Chmp5	charged multivesicular body protein 5 [Source:MGI Symbol;Acc:MGI:1924209]	Down	-1.59639	6.17222	2127.8	1059.67	5.04107e-05	0.000890759
Cdk5rap3	CDK5 regulatory subunit associated protein 3 [Source:MGI Symbol;Acc:MGI:1933126]	Up	1.18979	6.93745	1263.4	4805	5.0866e-05	0.000897793
Gm10561	predicted gene 10561 [Source:MGI Symbol;Acc:MGI:3648163]	Up	9.93015	1.53225	0	185.833	5.12719e-05	0.000903942
Tmod3	tropomodulin 3 [Source:MGI Symbol;Acc:MGI:1355315]	Down	-1.29012	6.08738	1636.2	1139.67	5.16366e-05	0.000909349
Syt14	synaptotagmin XIV [Source:MGI Symbol;Acc:MGI:2444490]	Up	7.73131	-0.518287	0	34.3333	5.2589e-05	0.000925083
Limk2	LIM motif-containing protein kinase 2 [Source:MGI Symbol;Acc:MGI:1197517]	Up	1.35024	6.89748	1139.8	4983.83	5.27755e-05	0.000927325
Mydgf	myeloid derived growth factor [Source:MGI Symbol;Acc:MGI:2156020]	Up	1.26326	6.09506	613.6	2770.17	5.3216e-05	0.000934018
Dad1	defender against cell death 1 [Source:MGI Symbol;Acc:MGI:101912]	Up	1.25535	6.82265	1190.6	4613.33	5.32782e-05	0.000934065
Gm33106	#N/A	Up	6.58622	1.47201	0.8	135.333	5.36122e-05	0.000938873
Trim30a	tripartite motif-containing 30A [Source:MGI Symbol;Acc:MGI:98178]	Up	8.97238	0.616024	0	97	5.45594e-05	0.000954393
Dct	dopachrome tautomerase [Source:MGI Symbol;Acc:MGI:102563]	Up	8.64441	0.307576	0	61.5	5.46212e-05	0.000954412
Bcas1os2	brain enriched myelin associated protein 1, opposite strand 2 [Source:MGI Symbol;Acc:MGI:1920553]	Up	8.79856	1.91089	0.2	173.833	5.51487e-05	0.000962557
Ptp4a1	protein tyrosine phosphatase 4a1 [Source:MGI Symbol;Acc:MGI:1277096]	Down	-1.4205	5.82204	1442.6	872.5	5.56458e-05	0.000970153
Zfp287	zinc finger protein 287 [Source:MGI Symbol;Acc:MGI:2176561]	Up	8.20311	-0.099104	0	43.6667	5.58381e-05	0.000972426
Zfp786	zinc finger protein 786 [Source:MGI Symbol;Acc:MGI:3026883]	Up	5.66575	1.93776	2	189.833	5.59204e-05	0.000972779
Micu2	mitochondrial calcium uptake 2 [Source:MGI Symbol;Acc:MGI:1915764]	Down	-0.947949	6.7715	2425.6	2213.17	5.63426e-05	0.000979038
Scap	SREBF chaperone [Source:MGI Symbol;Acc:MGI:2135958]	Up	2.06308	5.46125	253	1920.17	5.73625e-05	0.000995659
Gm4221	predicted gene 4221 [Source:MGI Symbol;Acc:MGI:3782397]	Up	7.51231	-0.709227	0	27.3333	5.86395e-05	0.00101611
Ctsz	cathepsin Z [Source:MGI Symbol;Acc:MGI:1891190]	Up	1.19776	7.54386	2000.4	7561.33	5.86702e-05	0.00101611
Atp5mpl	ATP synthase membrane subunit 6.8PL [Source:MGI Symbol;Acc:MGI:1917507]	Up	0.942227	8.04307	2841.4	10385.8	5.90799e-05	0.00102117
Zfp109	zinc finger protein 109 [Source:MGI Symbol;Acc:MGI:1929099]	Up	7.71524	-0.532495	0	34.6667	5.90928e-05	0.00102117
Ifngr2	interferon gamma receptor 2 [Source:MGI Symbol;Acc:MGI:107654]	Down	-1.02576	6.98119	2971.8	2629.33	5.95201e-05	0.00102743
Hoxa7	homeobox A7 [Source:MGI Symbol;Acc:MGI:96179]	Up	2.14387	6.14804	371.6	3030.83	5.97236e-05	0.00102981
Zkscan5	zinc finger with KRAB and SCAN domains 5 [Source:MGI Symbol;Acc:MGI:107533]	Up	6.58974	2.7795	2.2	384.833	5.98879e-05	0.00103151
Cks2	CDC28 protein kinase regulatory subunit 2 [Source:MGI Symbol;Acc:MGI:1913447]	Down	-1.40625	5.40229	1126.2	692.5	6.02638e-05	0.00103684
Clptm1	cleft lip and palate associated transmembrane protein 1 [Source:MGI Symbol;Acc:MGI:1927155]	Up	1.19928	6.94577	1320.6	5005.17	6.0711e-05	0.00104339
Lemd2	LEM domain containing 2 [Source:MGI Symbol;Acc:MGI:2385045]	Up	1.43438	5.57863	411.4	1963.33	6.09378e-05	0.00104614
Dstn	destrin [Source:MGI Symbol;Acc:MGI:1929270]	Down	-0.843187	9.83124	20803.6	19797.7	6.11945e-05	0.0010494
Arid1a	AT rich interactive domain 1A (SWI-like) [Source:MGI Symbol;Acc:MGI:1935147]	Up	1.20452	6.62408	991.2	3725.83	6.16447e-05	0.00105597
Fasn	fatty acid synthase [Source:MGI Symbol;Acc:MGI:95485]	Up	1.23438	6.96159	1289.2	4774	6.22054e-05	0.00106441
Mt2	metallothionein 2 [Source:MGI Symbol;Acc:MGI:97172]	Up	1.76114	6.22781	566.4	2925.17	6.2741e-05	0.00107241
LOC118568317	#N/A	Up	8.22777	-0.0767482	0	46.5	6.28508e-05	0.00107311
4930556M19Rik	RIKEN cDNA 4930556M19 gene [Source:MGI Symbol;Acc:MGI:1922509]	Up	7.88932	-0.382245	0	31.3333	6.30506e-05	0.00107536
Rad23b	RAD23 homolog B, nucleotide excision repair protein [Source:MGI Symbol;Acc:MGI:105128]	Down	-1.01291	6.74268	2549.2	2148.83	6.34791e-05	0.00108117
Arl2bp	ADP-ribosylation factor-like 2 binding protein [Source:MGI Symbol;Acc:MGI:1349429]	Down	-1.24287	6.70931	2629.2	1795.83	6.35843e-05	0.00108117
Gipr	gastric inhibitory polypeptide receptor [Source:MGI Symbol;Acc:MGI:1352753]	Up	7.8313	-0.428632	0	42.1667	6.35984e-05	0.00108117
Bcar3	breast cancer anti-estrogen resistance 3 [Source:MGI Symbol;Acc:MGI:1352501]	Down	-1.55845	5.27052	981.4	581.333	6.3971e-05	0.00108633
B3gnt4	UDP-GlcNAc:betaGal beta-1,3-N-acetylglucosaminyltransferase 4 [Source:MGI Symbol;Acc:MGI:2680208]	Up	7.64867	-0.590294	0	32.5	6.41784e-05	0.00108867
Tmem238l	transmembrane protein 238 like [Source:MGI Symbol;Acc:MGI:1918826]	Down	-1.51497	6.1618	1987.2	1103.17	6.50955e-05	0.00110304
Tmem138	transmembrane protein 138 [Source:MGI Symbol;Acc:MGI:1920232]	Up	7.48189	0.976705	0.2	101.167	6.5763e-05	0.00111315
Gm38978	#N/A	Up	9.81648	1.42091	0	138.167	6.58627e-05	0.00111363
Rian	RNA imprinted and accumulated in nucleus [Source:MGI Symbol;Acc:MGI:1922995]	Down	-10.9503	2.26692	216.6	0	6.72475e-05	0.00113582
LOC118567441	#N/A	Up	9.11059	0.745821	0	98.5	6.73234e-05	0.00113588
Gm51448	#N/A	Up	8.24588	-0.0594445	0	45.1667	6.80063e-05	0.00114617
Dtx3l	deltex 3-like, E3 ubiquitin ligase [Source:MGI Symbol;Acc:MGI:2656973]	Down	-1.87881	5.48417	1120.8	597.167	6.80967e-05	0.00114647
Cpne8	copine VIII [Source:MGI Symbol;Acc:MGI:1914121]	Down	-1.87178	5.03247	918.2	399.833	6.84205e-05	0.00115068
Eif5a	eukaryotic translation initiation factor 5A [Source:MGI Symbol;Acc:MGI:106248]	Down	-0.905192	8.49641	8351.2	7504	6.91277e-05	0.00116133
Grpel1	GrpE-like 1, mitochondrial [Source:MGI Symbol;Acc:MGI:1334417]	Down	-1.10777	6.54064	2087.8	1824.67	6.9718e-05	0.00116999
Trp53inp2	transformation related protein 53 inducible nuclear protein 2 [Source:MGI Symbol;Acc:MGI:1915978]	Down	-1.18999	7.23322	3644.2	2679.33	7.05587e-05	0.00118284
Gipc2	GIPC PDZ domain containing family, member 2 [Source:MGI Symbol;Acc:MGI:1889209]	Down	-0.895893	8.17864	6619.4	6103.83	7.07243e-05	0.00118435
Dnhd1	dynein heavy chain domain 1 [Source:MGI Symbol;Acc:MGI:1924755]	Up	8.78693	0.438363	0	58.1667	7.09794e-05	0.00118636
Hdac10	histone deacetylase 10 [Source:MGI Symbol;Acc:MGI:2158340]	Up	5.85134	4.01886	12.6	868	7.09958e-05	0.00118636
Cdk10	cyclin-dependent kinase 10 [Source:MGI Symbol;Acc:MGI:2448549]	Up	3.25904	5.54198	146.2	2274.5	7.11825e-05	0.00118822
LOC118568512	#N/A	Up	7.05431	0.465775	0.2	71.8333	7.12998e-05	0.00118891
Car4	carbonic anhydrase 4 [Source:MGI Symbol;Acc:MGI:1096574]	Down	-1.45203	7.59268	5085.8	2919.83	7.24334e-05	0.00120653
Gabarapl2	gamma-aminobutyric acid (GABA) A receptor-associated protein-like 2 [Source:MGI Symbol;Acc:MGI:1890602]	Down	-1.18807	5.83916	1412	1030.67	7.26252e-05	0.00120844
Pdcd6	programmed cell death 6 [Source:MGI Symbol;Acc:MGI:109283]	Down	-1.14815	6.41299	2039	1646.33	7.35767e-05	0.00122298
Arrdc1	arrestin domain containing 1 [Source:MGI Symbol;Acc:MGI:2446136]	Up	1.35817	6.30986	794.8	3224	7.40752e-05	0.00122996
Arfgap1	ADP-ribosylation factor GTPase activating protein 1 [Source:MGI Symbol;Acc:MGI:2183559]	Up	1.78803	6.18787	533.4	2962	7.42195e-05	0.00123105
Pde2a	phosphodiesterase 2A, cGMP-stimulated [Source:MGI Symbol;Acc:MGI:2446107]	Up	1.47314	6.74037	997.2	4217.33	7.65839e-05	0.00126893
LOC118568289	#N/A	Up	6.95152	-1.17682	0	18.8333	7.67353e-05	0.0012701
Opa1	OPA1, mitochondrial dynamin like GTPase [Source:MGI Symbol;Acc:MGI:1921393]	Down	-1.22415	6.51686	2154	1615.67	7.71002e-05	0.00127382
Vasp	vasodilator-stimulated phosphoprotein [Source:MGI Symbol;Acc:MGI:109268]	Down	-0.866642	8.0096	6115.4	5549.67	7.71227e-05	0.00127382
Ugdh	UDP-glucose dehydrogenase [Source:MGI Symbol;Acc:MGI:1306785]	Down	-1.33624	9.05522	13596.4	8327.33	7.76061e-05	0.0012803
Mbd4	methyl-CpG binding domain protein 4 [Source:MGI Symbol;Acc:MGI:1333850]	Up	6.02815	0.75761	0.6	103.167	7.76778e-05	0.0012803
Srebf1	sterol regulatory element binding transcription factor 1 [Source:MGI Symbol;Acc:MGI:107606]	Up	1.88723	5.17023	248.6	1626.67	7.79778e-05	0.00128389
Rpl31	ribosomal protein L31 [Source:MGI Symbol;Acc:MGI:2149632]	Up	0.804791	9.91355	12085.4	36466.8	7.86614e-05	0.00129379
Gzma	granzyme A [Source:MGI Symbol;Acc:MGI:109266]	Up	9.63028	1.23988	0	101.833	8.06613e-05	0.00132529
Slc39a2	solute carrier family 39 (zinc transporter), member 2 [Source:MGI Symbol;Acc:MGI:2684326]	Up	9.22431	0.85335	0	102.333	8.13464e-05	0.00133515
Glb1l	galactosidase, beta 1-like [Source:MGI Symbol;Acc:MGI:1921827]	Up	8.92287	0.568957	0	89.3333	8.18544e-05	0.00134209
Mterf1b	mitochondrial transcription termination factor 1b [Source:MGI Symbol;Acc:MGI:3704243]	Up	8.45763	0.133214	0	50.1667	8.463e-05	0.00138612
Prr22	proline rich 22 [Source:MGI Symbol;Acc:MGI:2685392]	Up	8.77893	0.430086	0	60.3333	8.47166e-05	0.00138612
Xiap	X-linked inhibitor of apoptosis [Source:MGI Symbol;Acc:MGI:107572]	Down	-1.53682	5.94243	1751.6	907.167	8.6949e-05	0.00142116
Tnrc6c	trinucleotide repeat containing 6C [Source:MGI Symbol;Acc:MGI:2443265]	Down	-1.73501	5.75672	1476.2	754.333	8.72201e-05	0.00142411
Gm11769	predicted gene 11769 [Source:MGI Symbol;Acc:MGI:3702101]	Up	8.81594	0.468875	0	84.6667	8.87876e-05	0.0014482
Tgm4	transglutaminase 4 (prostate) [Source:MGI Symbol;Acc:MGI:3027002]	Up	9.96129	1.56132	0	162.333	8.94491e-05	0.00145747
Ppm1k	protein phosphatase 1K (PP2C domain containing) [Source:MGI Symbol;Acc:MGI:2442111]	Up	5.88186	0.944111	0.8	98	9.06495e-05	0.00147512
D130020L05Rik	RIKEN cDNA D130020L05 gene [Source:MGI Symbol;Acc:MGI:2450270]	Up	7.57454	-0.65643	0	26.8333	9.07202e-05	0.00147512
Pbxip1	pre B cell leukemia transcription factor interacting protein 1 [Source:MGI Symbol;Acc:MGI:2441670]	Up	1.56165	6.99416	1026.4	5528.17	9.27961e-05	0.00150691
Itga3	integrin alpha 3 [Source:MGI Symbol;Acc:MGI:96602]	Up	1.65275	5.92979	447.6	2465.67	9.28672e-05	0.00150691
Efcab5	EF-hand calcium binding domain 5 [Source:MGI Symbol;Acc:MGI:2442440]	Down	-3.1963	4.615	903.6	139.333	9.3166e-05	0.00151019
Trabd2b	TraB domain containing 2B [Source:MGI Symbol;Acc:MGI:3650152]	Up	8.97626	0.615524	0	65.1667	9.42767e-05	0.00152662
Catsper4	cation channel, sperm associated 4 [Source:MGI Symbol;Acc:MGI:3043288]	Up	8.11136	-0.180923	0	42.3333	9.72048e-05	0.00157241
Btnl5-ps	butyrophilin-like 5, pseudogene [Source:MGI Symbol;Acc:MGI:1932037]	Down	-1.56278	5.71306	1450.8	793	9.75628e-05	0.00157658
Ap1ar	adaptor-related protein complex 1 associated regulatory protein [Source:MGI Symbol;Acc:MGI:2384822]	Down	-1.1139	6.45912	2192.8	1609.83	9.79051e-05	0.00158048
Slc35e2	solute carrier family 35, member E2 [Source:MGI Symbol;Acc:MGI:2444240]	Down	-1.59947	6.03805	1573.8	950	9.89272e-05	0.00159413
Clint1	clathrin interactor 1 [Source:MGI Symbol;Acc:MGI:2144243]	Down	-1.02833	7.43559	4143.2	3278.17	9.89537e-05	0.00159413
Sfswap	splicing factor SWAP [Source:MGI Symbol;Acc:MGI:101760]	Up	1.76789	5.42032	313.8	1751.5	9.98063e-05	0.00160622
Cdk11b	cyclin-dependent kinase 11B [Source:MGI Symbol;Acc:MGI:88353]	Up	1.30483	7.0059	1323.2	4895.83	0.000102891	0.00165416
Gm8940	predicted gene 8940 [Source:MGI Symbol;Acc:MGI:3643403]	Up	7.1542	-1.00981	0	23.6667	0.000103054	0.00165508
Map2k1	mitogen-activated protein kinase kinase 1 [Source:MGI Symbol;Acc:MGI:1346866]	Down	-1.12567	6.42584	2227.2	1666.17	0.000103357	0.00165826
Gm46287	#N/A	Up	6.88817	-1.2287	0	16.3333	0.000103921	0.00166561
Hint2	histidine triad nucleotide binding protein 2 [Source:MGI Symbol;Acc:MGI:1916167]	Up	1.24985	6.04571	682.8	2719.83	0.000104169	0.00166787
Gtf3c2	general transcription factor IIIC, polypeptide 2, beta [Source:MGI Symbol;Acc:MGI:1919002]	Up	1.0627	6.21892	797.6	2768	0.000104374	0.00166945
Ptgs1	prostaglandin-endoperoxide synthase 1 [Source:MGI Symbol;Acc:MGI:97797]	Up	9.9568	1.55558	0	126.167	0.000104724	0.00167334
Tmigd1	transmembrane and immunoglobulin domain containing 1 [Source:MGI Symbol;Acc:MGI:1913851]	Down	-1.96174	5.76525	1636.8	618	0.000104835	0.00167342
Psmd7	proteasome (prosome, macropain) 26S subunit, non-ATPase, 7 [Source:MGI Symbol;Acc:MGI:1351511]	Down	-1.02539	7.38869	4125.2	3384.5	0.000105204	0.0016776
Hsd17b4	hydroxysteroid (17-beta) dehydrogenase 4 [Source:MGI Symbol;Acc:MGI:105089]	Down	-1.02071	7.0233	3151.4	2456.83	0.000105322	0.00167777
Klhl8	kelch-like 8 [Source:MGI Symbol;Acc:MGI:2179430]	Up	9.31971	0.944112	0	101.667	0.000105477	0.00167853
Atp5o	ATP synthase, H+ transporting, mitochondrial F1 complex, O subunit [Source:MGI Symbol;Acc:MGI:106341]	Up	0.736467	9.87392	11803	33704.2	0.00010564	0.00167943
Tcirg1	T cell, immune regulator 1, ATPase, H+ transporting, lysosomal V0 protein A3 [Source:MGI Symbol;Acc:MGI:1350931]	Up	1.87631	6.07913	409	2882.5	0.000105824	0.00168064
LOC118567821	#N/A	Up	9.93536	1.53427	0	118.667	0.00010593	0.00168064
Gsdma	gasdermin A [Source:MGI Symbol;Acc:MGI:1889509]	Up	7.70367	-0.542805	0	32.3333	0.000106302	0.00168483
Rps24	ribosomal protein S24 [Source:MGI Symbol;Acc:MGI:98147]	Up	0.80626	11.3953	33791.2	103032	0.000106965	0.00169363
Khk	ketohexokinase [Source:MGI Symbol;Acc:MGI:1096353]	Up	1.74481	5.5215	388.2	1924.33	0.000107284	0.00169697
Ecpas	Ecm29 proteasome adaptor and scaffold [Source:MGI Symbol;Acc:MGI:2140220]	Up	1.27025	6.65676	1056.6	4019.67	0.000108063	0.00170757
Nr2f6	nuclear receptor subfamily 2, group F, member 6 [Source:MGI Symbol;Acc:MGI:1352453]	Up	1.23713	6.40689	902.8	3366.83	0.000108731	0.00171639
Slc18a1	solute carrier family 18 (vesicular monoamine), member 1 [Source:MGI Symbol;Acc:MGI:106684]	Up	8.25138	-0.0562212	0	41.3333	0.000108938	0.00171794
Cfap157	cilia and flagella associated protein 157 [Source:MGI Symbol;Acc:MGI:2447809]	Up	6.51927	0.409201	0.4	75.5	0.000109494	0.00172496
Tmem238	transmembrane protein 238 [Source:MGI Symbol;Acc:MGI:1922935]	Up	1.46324	6.06986	576.2	2617.67	0.000110063	0.0017322
Tulp3	tubby-like protein 3 [Source:MGI Symbol;Acc:MGI:1329045]	Up	8.1523	-0.146037	0	38	0.000110611	0.00173907
Cfb	complement factor B [Source:MGI Symbol;Acc:MGI:105975]	Up	1.17603	6.32052	838.4	3405.17	0.000111456	0.0017506
Ift80	intraflagellar transport 80 [Source:MGI Symbol;Acc:MGI:1915509]	Up	9.77107	1.37831	0	166.167	0.000111912	0.00175601
LOC115486414	#N/A	Up	6.26142	0.583647	0.6	70.8333	0.000112115	0.00175744
Mroh6	maestro heat-like repeat family member 6 [Source:MGI Symbol;Acc:MGI:5011755]	Up	8.20189	-0.101587	0	39.8333	0.000112646	0.001764
Id3	inhibitor of DNA binding 3 [Source:MGI Symbol;Acc:MGI:96398]	Down	-1.34916	6.22407	1952.8	1344.33	0.000113872	0.00178143
Gm40454	#N/A	Up	8.39299	0.0712628	0	42.8333	0.000114953	0.00179654
Cdkn2b	cyclin dependent kinase inhibitor 2B [Source:MGI Symbol;Acc:MGI:104737]	Down	-1.25499	5.79195	1473	971.5	0.000115725	0.00180589
Scamp4	secretory carrier membrane protein 4 [Source:MGI Symbol;Acc:MGI:1928947]	Up	1.58221	5.78097	499.4	2314.5	0.000115782	0.00180589
Stx19	syntaxin 19 [Source:MGI Symbol;Acc:MGI:1915409]	Up	9.36211	0.984002	0	103.333	0.00011625	0.0018095
Tab1	TGF-beta activated kinase 1/MAP3K7 binding protein 1 [Source:MGI Symbol;Acc:MGI:1913763]	Up	2.08275	4.9839	170.8	1358.83	0.000116306	0.0018095
Elfn2	leucine rich repeat and fibronectin type III, extracellular 2 [Source:MGI Symbol;Acc:MGI:3608416]	Up	8.42795	0.111299	0	74	0.000116359	0.0018095
Rgs9	regulator of G-protein signaling 9 [Source:MGI Symbol;Acc:MGI:1338824]	Down	-3.63912	7.87243	6103.8	833	0.000117408	0.00182401
Pmepa1	prostate transmembrane protein, androgen induced 1 [Source:MGI Symbol;Acc:MGI:1929600]	Down	-1.78417	5.89905	1636.2	807.667	0.000118089	0.00183277
Tbc1d25	TBC1 domain family, member 25 [Source:MGI Symbol;Acc:MGI:2444862]	Up	6.45217	1.86594	1.6	186.5	0.00011906	0.00184602
Slc37a2	solute carrier family 37 (glycerol-3-phosphate transporter), member 2 [Source:MGI Symbol;Acc:MGI:1929693]	Up	10.5108	2.09817	0	311.833	0.000119595	0.00185248
Zbtb20	zinc finger and BTB domain containing 20 [Source:MGI Symbol;Acc:MGI:1929213]	Up	3.72924	5.22943	82.2	1822	0.000119726	0.00185268
Gm32262	#N/A	Up	5.5085	1.96709	2.2	200.833	0.000123643	0.00191141
Acot7	acyl-CoA thioesterase 7 [Source:MGI Symbol;Acc:MGI:1917275]	Up	0.944127	7.69532	2375.4	7815.33	0.000124154	0.00191742
Rpl37a	ribosomal protein L37a [Source:MGI Symbol;Acc:MGI:98068]	Up	0.907936	8.73077	4913.2	16876.3	0.000124401	0.00191809
Gm41748	#N/A	Up	9.61117	1.22213	0	117.5	0.000124442	0.00191809
Lefty1	left right determination factor 1 [Source:MGI Symbol;Acc:MGI:107405]	Up	9.20111	0.831808	0	101.667	0.000124864	0.00192271
Mapk11	mitogen-activated protein kinase 11 [Source:MGI Symbol;Acc:MGI:1338024]	Up	9.5556	1.16811	0	97.8333	0.000126769	0.00195013
Sparcl1	SPARC-like 1 [Source:MGI Symbol;Acc:MGI:108110]	Up	6.12649	-0.383434	0.2	33.6667	0.000126912	0.00195042
Naprt	nicotinate phosphoribosyltransferase [Source:MGI Symbol;Acc:MGI:2442664]	Up	0.972915	6.80577	1282.4	4249.33	0.000127283	0.00195273
Casp14	caspase 14 [Source:MGI Symbol;Acc:MGI:1335092]	Up	10.1223	1.71921	0	234	0.000127311	0.00195273
Mrpl28	mitochondrial ribosomal protein L28 [Source:MGI Symbol;Acc:MGI:1915861]	Up	1.12117	6.83038	1088.4	4436.67	0.000127916	0.00196009
B230398E01Rik	RIKEN cDNA B230398E01 gene [Source:MGI Symbol;Acc:MGI:1925930]	Down	-2.53997	4.21408	591	164.167	0.000130036	0.00199063
Thoc2	THO complex 2 [Source:MGI Symbol;Acc:MGI:2442413]	Down	-1.32542	6.88888	3372.4	1895.5	0.000130582	0.00199704
C1qtnf6	C1q and tumor necrosis factor related protein 6 [Source:MGI Symbol;Acc:MGI:1919959]	Up	2.43557	5.28614	164.8	1846.83	0.000131371	0.00200715
Gm34854	#N/A	Up	7.8703	-0.39922	0	30.6667	0.000131702	0.00201025
Kpna2	karyopherin (importin) alpha 2 [Source:MGI Symbol;Acc:MGI:103561]	Down	-1.03438	6.86588	2788.8	2244.67	0.00013346	0.0020351
Gm22716	predicted gene, 22716 [Source:MGI Symbol;Acc:MGI:5452493]	Up	8.74408	0.399472	0	60.6667	0.000134343	0.00204657
Jade3	jade family PHD finger 3 [Source:MGI Symbol;Acc:MGI:2148019]	Up	9.39155	1.01135	0	97	0.000136345	0.00207507
Snora65	small nucleolar RNA, H/ACA box 65 [Source:MGI Symbol;Acc:MGI:2148176]	Up	9.24137	0.867636	0	80.1667	0.000138837	0.00211095
Tgoln1	trans-golgi network protein [Source:MGI Symbol;Acc:MGI:105080]	Up	0.780813	9.15174	7050.8	20565.8	0.000139747	0.00212272
Gm46840	#N/A	Up	6.79684	2.94458	1.8	353.833	0.000140456	0.00213143
Aopep	aminopeptidase O [Source:MGI Symbol;Acc:MGI:1919311]	Up	1.48079	5.49959	378.6	1953.33	0.000143335	0.00217301
Dynll1	dynein light chain LC8-type 1 [Source:MGI Symbol;Acc:MGI:1861457]	Down	-0.932174	7.38153	4097.6	3553	0.000148165	0.00224408
Gjb1	gap junction protein, beta 1 [Source:MGI Symbol;Acc:MGI:95719]	Up	1.63022	5.68312	378	2288	0.000148742	0.00225064
Gm10451	predicted gene 10451 [Source:MGI Symbol;Acc:MGI:3641898]	Up	8.27291	-0.0303411	0	65.3333	0.000150363	0.00227297
Cth	cystathionase (cystathionine gamma-lyase) [Source:MGI Symbol;Acc:MGI:1339968]	Down	-1.00979	6.23495	1820.6	1502	0.000151474	0.00228756
Mall	mal, T cell differentiation protein-like [Source:MGI Symbol;Acc:MGI:2385152]	Down	-1.04869	6.85065	2821.6	2188.5	0.000151838	0.00229086
LOC118568205	#N/A	Up	6.63339	1.31866	0.6	129.167	0.00015239	0.00229698
Gm33862	#N/A	Up	8.56596	0.232138	0	49.1667	0.000152639	0.0022984
A330001L22Rik	#N/A	Up	7.95942	-0.32173	0	30.3333	0.000152778	0.0022984
Tnxb	tenascin XB [Source:MGI Symbol;Acc:MGI:1932137]	Up	9.53035	1.14639	0	130.333	0.000152945	0.00229872
Rpl30	ribosomal protein L30 [Source:MGI Symbol;Acc:MGI:98037]	Up	0.803337	9.36269	8242.4	25344.8	0.000155277	0.00233154
Mlph	melanophilin [Source:MGI Symbol;Acc:MGI:2176380]	Down	-0.932237	6.91204	2808.4	2461.67	0.00015631	0.0023448
Fam234a	family with sequence similarity 234, member A [Source:MGI Symbol;Acc:MGI:2146854]	Up	0.957519	7.98927	3010	9399.83	0.000159403	0.00238891
Inca1	inhibitor of CDK, cyclin A1 interacting protein 1 [Source:MGI Symbol;Acc:MGI:2144284]	Up	6.67908	1.73359	0.8	163.167	0.000160386	0.00240135
Hapln4	hyaluronan and proteoglycan link protein 4 [Source:MGI Symbol;Acc:MGI:2679531]	Up	9.22245	0.8502	0	82.3333	0.000161521	0.00241604
Gpaa1	GPI anchor attachment protein 1 [Source:MGI Symbol;Acc:MGI:1202392]	Up	1.92534	5.49236	359.8	1959.33	0.000163471	0.00244288
Plxnb2	plexin B2 [Source:MGI Symbol;Acc:MGI:2154239]	Up	1.08117	8.08956	2648.6	10445.8	0.000163928	0.00244738
Npepl1	aminopeptidase-like 1 [Source:MGI Symbol;Acc:MGI:2448523]	Up	1.33835	6.14874	679.6	2846	0.000164806	0.00245815
Creb3l1	cAMP responsive element binding protein 3-like 1 [Source:MGI Symbol;Acc:MGI:1347062]	Up	1.22346	7.966	2553.8	10023.3	0.000165693	0.00246903
Efhb	EF hand domain family, member B [Source:MGI Symbol;Acc:MGI:3045296]	Up	9.22686	0.85584	0	97.3333	0.000166485	0.00247847
A130010J15Rik	RIKEN cDNA A130010J15 gene [Source:MGI Symbol;Acc:MGI:2441776]	Down	-2.17259	4.82792	834.8	286.833	0.000166977	0.00248175
Bach2	BTB and CNC homology, basic leucine zipper transcription factor 2 [Source:MGI Symbol;Acc:MGI:894679]	Up	7.68014	1.06376	0.2	104	0.000167021	0.00248175
Naxd	NAD(P)HX dehydratase [Source:MGI Symbol;Acc:MGI:1913353]	Up	1.07253	6.64331	1078.8	3952.5	0.000168894	0.0025072
Ywhah	tyrosine 3-monooxygenase/tryptophan 5-monooxygenase activation protein, eta polypeptide [Source:MGI Symbol;Acc:MGI:109194]	Down	-0.957557	7.68164	4945.2	4270.83	0.000169869	0.00251929
Gm24265	predicted gene, 24265 [Source:MGI Symbol;Acc:MGI:5454042]	Up	8.98991	0.630267	0	78.6667	0.000172019	0.00254877
Rps15	ribosomal protein S15 [Source:MGI Symbol;Acc:MGI:98117]	Up	0.922136	11.2895	28924.2	98052.3	0.000173388	0.00256664
Lrrc45	leucine rich repeat containing 45 [Source:MGI Symbol;Acc:MGI:2387183]	Up	1.49163	5.16886	310.6	1456	0.000174155	0.00257556
Rrp1	ribosomal RNA processing 1 [Source:MGI Symbol;Acc:MGI:1203500]	Up	1.15652	7.55501	1863.4	7247.5	0.00017744	0.00262167
Gnai3	guanine nucleotide binding protein (G protein), alpha inhibiting 3 [Source:MGI Symbol;Acc:MGI:95773]	Down	-1.24386	6.3661	2133	1486.17	0.000178386	0.00263317
Gm35290	predicted gene, 35290 [Source:MGI Symbol;Acc:MGI:5594449]	Up	9.37681	0.995917	0	81.8333	0.000179373	0.00264525
Phf2os1	PHD finger protein 2, opposite strand 1 [Source:MGI Symbol;Acc:MGI:3645592]	Up	9.01996	0.658576	0	80.3333	0.000180926	0.00266564
Golph3	golgi phosphoprotein 3 [Source:MGI Symbol;Acc:MGI:1913879]	Down	-1.19908	7.13468	3633	2502.83	0.000182896	0.00269214
Gm14295	predicted gene 14295 [Source:MGI Symbol;Acc:MGI:3709624]	Up	7.67602	1.18272	0.2	120.333	0.000184388	0.00271156
Pigt	phosphatidylinositol glycan anchor biosynthesis, class T [Source:MGI Symbol;Acc:MGI:1926178]	Up	1.0372	6.69073	1086.8	4024.67	0.00018511	0.00271962
Alas1	aminolevulinic acid synthase 1 [Source:MGI Symbol;Acc:MGI:87989]	Down	-0.961339	6.82875	2681	2227	0.000185531	0.00272327
Mgat4c	MGAT4 family, member C [Source:MGI Symbol;Acc:MGI:1914819]	Down	-1.23368	6.92434	2904	2089.67	0.000185847	0.00272536
Dap	death-associated protein [Source:MGI Symbol;Acc:MGI:1918190]	Down	-0.94967	7.02487	3049.6	2614.5	0.000186138	0.00272707
Dhx32	DEAH (Asp-Glu-Ala-His) box polypeptide 32 [Source:MGI Symbol;Acc:MGI:2141813]	Down	-0.997306	6.4853	2141.6	1758.17	0.000186588	0.00273111
Mdm4	transformed mouse 3T3 cell double minute 4 [Source:MGI Symbol;Acc:MGI:107934]	Up	1.6594	4.94719	235	1241.17	0.000189233	0.00276724
Ttc41	tetratricopeptide repeat domain 41 [Source:MGI Symbol;Acc:MGI:2387653]	Up	9.0146	0.653715	0	82.1667	0.00018968	0.00277006
Gm38641	#N/A	Up	9.18599	0.815694	0	89.8333	0.000189778	0.00277006
Dclk3	doublecortin-like kinase 3 [Source:MGI Symbol;Acc:MGI:3039580]	Up	9.11122	0.745033	0	87.6667	0.000190217	0.00277081
Kmt5c	lysine methyltransferase 5C [Source:MGI Symbol;Acc:MGI:2385262]	Up	1.20225	5.933	607.6	2334.33	0.000190257	0.00277081
Hmgcl	3-hydroxy-3-methylglutaryl-Coenzyme A lyase [Source:MGI Symbol;Acc:MGI:96158]	Down	-0.955099	7.6459	4395.2	3922.67	0.000190359	0.00277081
Abcb6	ATP-binding cassette, sub-family B (MDR/TAP), member 6 [Source:MGI Symbol;Acc:MGI:1921354]	Up	1.68506	6.0981	503.2	2798.83	0.000192721	0.00280258
Dennd1c	DENN/MADD domain containing 1C [Source:MGI Symbol;Acc:MGI:1918035]	Down	-2.11301	4.71237	668.6	281.167	0.000193414	0.00281005
Tmcc3	transmembrane and coiled coil domains 3 [Source:MGI Symbol;Acc:MGI:2442900]	Down	-1.09692	6.56914	2365.4	1692.83	0.000194064	0.00281689
Map9	microtubule-associated protein 9 [Source:MGI Symbol;Acc:MGI:2442208]	Up	9.20008	0.828176	0	77.1667	0.00019463	0.00282249
Dync2h1	dynein cytoplasmic 2 heavy chain 1 [Source:MGI Symbol;Acc:MGI:107736]	Up	9.31424	0.937789	0	99.5	0.000195704	0.00283545
Gm33361	#N/A	Up	9.25983	0.885667	0	89.1667	0.000196653	0.00284657
Gss	glutathione synthetase [Source:MGI Symbol;Acc:MGI:95852]	Up	0.823902	7.3517	1938.8	6005	0.00019771	0.00285923
Zc3h14	zinc finger CCCH type containing 14 [Source:MGI Symbol;Acc:MGI:1919824]	Down	-1.20885	5.68237	1260.8	916.167	0.000198158	0.0028603
Rpl23	ribosomal protein L23 [Source:MGI Symbol;Acc:MGI:1929455]	Up	0.814323	10.9088	23625.2	74174.8	0.000198211	0.0028603
Arid2	AT rich interactive domain 2 (ARID, RFX-like) [Source:MGI Symbol;Acc:MGI:1924294]	Up	2.06442	5.0548	183.6	1484	0.000198331	0.0028603
Gm52360	#N/A	Up	7.51261	-0.707855	0	28.5	0.000199042	0.00286792
Sae1	SUMO1 activating enzyme subunit 1 [Source:MGI Symbol;Acc:MGI:1929264]	Up	1.12095	6.4556	975.4	3543.83	0.000199833	0.00287668
Rn7s1	7S RNA 1 [Source:MGI Symbol;Acc:MGI:97950]	Down	-3.5934	5.87966	1481.2	223.5	0.000202938	0.0029187
Gm46095	#N/A	Up	8.86965	0.516797	0	71.5	0.000205098	0.00294707
Golgb1	golgi autoantigen, golgin subfamily b, macrogolgin 1 [Source:MGI Symbol;Acc:MGI:1099447]	Up	1.08042	6.88019	1249	4357.5	0.000205754	0.00295378
Tprgl	transformation related protein 63 regulated like [Source:MGI Symbol;Acc:MGI:1915058]	Down	-0.931254	6.45061	2019.6	1843.83	0.000206083	0.00295518
Cnnm2	cyclin M2 [Source:MGI Symbol;Acc:MGI:2151054]	Up	9.51989	1.13359	0	95	0.000206228	0.00295518
Gclm	glutamate-cysteine ligase, modifier subunit [Source:MGI Symbol;Acc:MGI:104995]	Down	-1.12176	6.85711	2921.4	2135.5	0.000206633	0.00295828
Os9	amplified in osteosarcoma [Source:MGI Symbol;Acc:MGI:1924301]	Up	0.920322	7.04207	1593.6	5044.17	0.000209361	0.00299461
Gm15331	predicted gene 15331 [Source:MGI Symbol;Acc:MGI:3705549]	Up	8.80496	0.45626	0	67	0.000209662	0.00299618
Gm36193	#N/A	Up	9.30734	0.93314	0	115.833	0.000209961	0.00299773
Ube2d3	ubiquitin-conjugating enzyme E2D 3 [Source:MGI Symbol;Acc:MGI:1913355]	Down	-0.880976	7.66772	4750.4	4324.67	0.000212028	0.00302448
Tmod4	tropomodulin 4 [Source:MGI Symbol;Acc:MGI:1355285]	Up	9.09377	0.730682	0	100.5	0.000213043	0.0030362
2700081O15Rik	#N/A	Up	9.04269	0.678847	0	71.3333	0.000216361	0.00308027
Dot1l	DOT1-like, histone H3 methyltransferase (S. cerevisiae) [Source:MGI Symbol;Acc:MGI:2143886]	Up	3.56931	4.43824	57.2	1066.33	0.000216528	0.00308027
Zfp82	zinc finger protein 82 [Source:MGI Symbol;Acc:MGI:1890753]	Up	8.96246	0.603292	0	66.5	0.000218302	0.0031027
Cavin2	caveolae associated 2 [Source:MGI Symbol;Acc:MGI:99513]	Up	8.91867	0.561564	0	62.8333	0.000218875	0.00310803
Slc26a6	solute carrier family 26, member 6 [Source:MGI Symbol;Acc:MGI:2159728]	Up	8.90738	0.552208	0	70.5	0.0002201	0.00312259
Shh	sonic hedgehog [Source:MGI Symbol;Acc:MGI:98297]	Up	8.80853	0.459261	0	61.6667	0.00022333	0.00316556
AU041133	expressed sequence AU041133 [Source:MGI Symbol;Acc:MGI:2143755]	Up	9.05562	0.693577	0	90.1667	0.000225337	0.00319112
Gm16863	predicted gene, 16863 [Source:MGI Symbol;Acc:MGI:4439787]	Up	8.77532	0.429572	0	71	0.000225581	0.0031917
Irx4	Iroquois homeobox 4 [Source:MGI Symbol;Acc:MGI:1355275]	Up	7.93037	-0.34547	0	32.3333	0.000225908	0.00319345
Tnfrsf4	tumor necrosis factor receptor superfamily, member 4 [Source:MGI Symbol;Acc:MGI:104512]	Up	8.72657	0.381536	0	55.1667	0.000227097	0.00320737
Fmo1	flavin containing monooxygenase 1 [Source:MGI Symbol;Acc:MGI:1310002]	Up	9.46398	1.08246	0	130.167	0.000228863	0.00322893
Abcg5	ATP binding cassette subfamily G member 5 [Source:MGI Symbol;Acc:MGI:1351659]	Up	7.4393	0.957129	0.2	135.5	0.000229035	0.00322893
Heg1	heart development protein with EGF-like domains 1 [Source:MGI Symbol;Acc:MGI:1924696]	Up	5.59266	1.49366	1.4	166	0.000230526	0.00324703
Prdm14	PR domain containing 14 [Source:MGI Symbol;Acc:MGI:3588194]	Up	8.71835	0.377754	0	74.6667	0.000230743	0.00324716
Kiss1	KiSS-1 metastasis-suppressor [Source:MGI Symbol;Acc:MGI:2663985]	Up	9.3984	1.01859	0	96.6667	0.000231117	0.00324951
Nfkbie	nuclear factor of kappa light polypeptide gene enhancer in B cells inhibitor, epsilon [Source:MGI Symbol;Acc:MGI:1194908]	Up	9.41475	1.03312	0	90.5	0.000231769	0.00325577
Nrp2	neuropilin 2 [Source:MGI Symbol;Acc:MGI:1100492]	Up	1.32516	6.00007	604.2	2411.33	0.000232543	0.00326371
Gm12589	predicted gene 12589 [Source:MGI Symbol;Acc:MGI:3650371]	Up	8.53208	0.204911	0	64.8333	0.000233272	0.00327101
Zfp94	zinc finger protein 94 [Source:MGI Symbol;Acc:MGI:107610]	Up	9.05695	0.694039	0	84.1667	0.000234091	0.00327957
Pecam1	platelet/endothelial cell adhesion molecule 1 [Source:MGI Symbol;Acc:MGI:97537]	Up	8.91303	0.557276	0	66.3333	0.000235115	0.00329098
Gm34283	#N/A	Down	-4.83076	0.581763	50.2	2.66667	0.00023571	0.00329638
Sbf1	SET binding factor 1 [Source:MGI Symbol;Acc:MGI:1925230]	Up	1.65565	6.08259	560.8	2816.17	0.00023792	0.00332432
LOC115487194	#N/A	Up	8.95932	0.601275	0	69.8333	0.000239421	0.00334231
Gm15972	predicted gene 15972 [Source:MGI Symbol;Acc:MGI:3801965]	Up	8.98332	0.626134	0	89.1667	0.000241512	0.00336851
Tob1	transducer of ErbB-2.1 [Source:MGI Symbol;Acc:MGI:1349721]	Down	-1.09251	6.07679	1512.2	1260.5	0.00024551	0.00342123
Tagap	T cell activation Rho GTPase activating protein [Source:MGI Symbol;Acc:MGI:3615484]	Up	5.7664	0.445716	0.6	83.1667	0.000246593	0.00343326
C920006O11Rik	RIKEN cDNA C920006O11 gene [Source:MGI Symbol;Acc:MGI:2443759]	Up	8.91347	0.558428	0	72.3333	0.000247794	0.00344694
Vsig8	V-set and immunoglobulin domain containing 8 [Source:MGI Symbol;Acc:MGI:3642995]	Up	8.7294	0.387374	0	74	0.000248358	0.00345171
Jup	junction plakoglobin [Source:MGI Symbol;Acc:MGI:96650]	Down	-0.84972	8.39643	7775.6	6982	0.000249774	0.00346833
Ndufa5	NADH:ubiquinone oxidoreductase subunit A5 [Source:MGI Symbol;Acc:MGI:1915452]	Up	1.08715	7.38696	1895.8	6537.67	0.000251074	0.0034833
Chst3	carbohydrate sulfotransferase 3 [Source:MGI Symbol;Acc:MGI:1858224]	Down	-5.73524	-0.592251	28.4	0.5	0.00025203	0.00349347
Ppp1r2	protein phosphatase 1, regulatory inhibitor subunit 2 [Source:MGI Symbol;Acc:MGI:1914099]	Down	-1.23373	6.14406	1681.6	1311	0.000254085	0.00351884
Csnk1a1	casein kinase 1, alpha 1 [Source:MGI Symbol;Acc:MGI:1934950]	Up	0.694504	7.76929	4715	5006.5	0.000254333	0.00351917
Soat2	sterol O-acyltransferase 2 [Source:MGI Symbol;Acc:MGI:1332226]	Up	9.35398	0.975171	0	87.3333	0.000254664	0.00352065
Notch2	notch 2 [Source:MGI Symbol;Acc:MGI:97364]	Up	8.78844	0.439274	0	57.1667	0.000255971	0.00353561
Trappc6b	trafficking protein particle complex 6B [Source:MGI Symbol;Acc:MGI:1925482]	Down	-1.29857	5.51248	1215	810.833	0.000256364	0.00353791
B230206L02Rik	RIKEN cDNA B230206L02 gene [Source:MGI Symbol;Acc:MGI:1924598]	Up	8.59802	0.265126	0	63.1667	0.00025724	0.00354689
Zfp112	zinc finger protein 112 [Source:MGI Symbol;Acc:MGI:1929115]	Up	9.08287	0.71622	0	68.3333	0.000258434	0.00356022
BC025920	cDNA sequence BC025920 [Source:MGI Symbol;Acc:MGI:2670983]	Up	8.45285	0.130705	0	55.3333	0.000260157	0.00358019
H1f2	H1.2 linker histone, cluster member [Source:MGI Symbol;Acc:MGI:1931526]	Down	-1.21717	6.08992	1757.2	1272.67	0.00026034	0.00358019
4933439K11Rik	RIKEN cDNA 4933439K11 gene [Source:MGI Symbol;Acc:MGI:1918569]	Up	8.21438	-0.0908893	0	38	0.000262541	0.00360474
Thbs4	thrombospondin 4 [Source:MGI Symbol;Acc:MGI:1101779]	Up	1.97194	6.37234	470.4	4359.83	0.000262585	0.00360474
Zfp692	zinc finger protein 692 [Source:MGI Symbol;Acc:MGI:2144276]	Up	6.1064	4.2966	7.6	1081.83	0.000263556	0.00361491
Gm36611	#N/A	Down	-10.0471	1.38379	112.6	0	0.000264125	0.00361955
Epop	elongin BC and polycomb repressive complex 2 associated protein [Source:MGI Symbol;Acc:MGI:2143991]	Down	-3.21038	3.69094	478.4	68.6667	0.000265103	0.00362978
Maats1	#N/A	Up	8.83652	0.487981	0	79	0.000266308	0.00364311
Tcp11	t-complex protein 11 [Source:MGI Symbol;Acc:MGI:98544]	Up	8.88489	0.53091	0	65	0.000267117	0.00365099
Ctsh	cathepsin H [Source:MGI Symbol;Acc:MGI:107285]	Up	1.19724	6.37725	872.2	3495.67	0.000267365	0.0036512
Ddx24	DEAD box helicase 24 [Source:MGI Symbol;Acc:MGI:1351337]	Down	-0.927255	6.84516	2739.6	2375.83	0.000268562	0.00366435
LOC118568133	#N/A	Up	9.29641	0.921433	0	104.167	0.000272557	0.00371564
Gm39628	#N/A	Up	6.31983	-0.112315	0.2	45	0.000273785	0.00372914
Gm33548	#N/A	Up	9.05675	0.692071	0	75	0.000274199	0.00373153
Atg2a	autophagy related 2A [Source:MGI Symbol;Acc:MGI:1916291]	Up	2.26649	5.00029	213.4	1402.33	0.000276476	0.00375926
Gm30084	#N/A	Up	8.56448	0.235128	0	67.5	0.000277129	0.00376487
Gnai2	guanine nucleotide binding protein (G protein), alpha inhibiting 2 [Source:MGI Symbol;Acc:MGI:95772]	Down	-0.807376	7.77237	4801.2	4705.67	0.000278239	0.00377669
Gm24400	predicted gene, 24400 [Source:MGI Symbol;Acc:MGI:5454177]	Up	8.27398	-0.0323891	0	51	0.00027974	0.00379378
Klhl15	kelch-like 15 [Source:MGI Symbol;Acc:MGI:1923400]	Up	8.55409	0.223472	0	58.6667	0.000281239	0.00380775
Zfp791	zinc finger protein 791 [Source:MGI Symbol;Acc:MGI:3648473]	Up	6.95166	0.374964	0.2	65.3333	0.000281419	0.00380775
Tmem40	transmembrane protein 40 [Source:MGI Symbol;Acc:MGI:2137870]	Up	9.19519	0.826375	0	109.167	0.000281498	0.00380775
Fancm	Fanconi anemia, complementation group M [Source:MGI Symbol;Acc:MGI:2442306]	Up	8.68491	0.345042	0	67.8333	0.000282039	0.00381177
Rflnb	refilin B [Source:MGI Symbol;Acc:MGI:1923816]	Down	-0.889012	7.66173	4697.4	4121.83	0.000282388	0.00381321
Pigw	phosphatidylinositol glycan anchor biosynthesis, class W [Source:MGI Symbol;Acc:MGI:1917575]	Up	8.80624	0.458044	0	67.6667	0.000283513	0.00382512
Plekhd1os	pleckstrin homology domain containing, family D (with coiled-coil domains) member 1, opposite strand [Source:MGI Symbol;Acc:MGI:1915604]	Up	8.83322	0.486002	0	87.8333	0.000283923	0.00382734
Prss32	protease, serine 32 [Source:MGI Symbol;Acc:MGI:1917064]	Up	0.732378	9.65563	10090.2	30157.8	0.000284835	0.00383635
Abca7	ATP-binding cassette, sub-family A (ABC1), member 7 [Source:MGI Symbol;Acc:MGI:1351646]	Up	1.32224	5.57127	423.4	1888	0.000287208	0.00386499
Baiap2l2	BAI1-associated protein 2-like 2 [Source:MGI Symbol;Acc:MGI:2652819]	Up	0.991441	6.40459	897.6	3203.33	0.000287795	0.00386957
Hsp90b1	heat shock protein 90, beta (Grp94), member 1 [Source:MGI Symbol;Acc:MGI:98817]	Up	0.943818	8.4156	4076.8	13029.5	0.000288212	0.00387186
Gm17508	predicted gene, 17508 [Source:MGI Symbol;Acc:MGI:4937142]	Up	7.77464	-0.483917	0	29	0.000289342	0.00388372
Dnah5	dynein, axonemal, heavy chain 5 [Source:MGI Symbol;Acc:MGI:107718]	Up	9.49691	1.11169	0	97	0.00029129	0.00390652
Fstl1	follistatin-like 1 [Source:MGI Symbol;Acc:MGI:102793]	Up	8.6966	0.356461	0	68.6667	0.000292706	0.00392216
Fbxw5	F-box and WD-40 domain protein 5 [Source:MGI Symbol;Acc:MGI:1354731]	Up	1.12217	6.24143	790.6	2894.83	0.000296097	0.00396422
Fgf12	fibroblast growth factor 12 [Source:MGI Symbol;Acc:MGI:109183]	Up	8.6602	0.320923	0	56.1667	0.000297106	0.00397433
Atp6v1g1	ATPase, H+ transporting, lysosomal V1 subunit G1 [Source:MGI Symbol;Acc:MGI:1913540]	Down	-0.89925	7.00056	3153.6	2664.5	0.000299645	0.00400471
Rnf212	ring finger protein 212 [Source:MGI Symbol;Acc:MGI:3645767]	Up	7.83143	1.12574	0.2	99.3333	0.000299888	0.00400471
Bhlhe40	basic helix-loop-helix family, member e40 [Source:MGI Symbol;Acc:MGI:1097714]	Down	-1.01783	6.15201	1718.6	1367	0.000300702	0.00401218
Palb2	partner and localizer of BRCA2 [Source:MGI Symbol;Acc:MGI:3040695]	Up	8.89815	0.544696	0	77.8333	0.000302857	0.00403749
Asxl3	ASXL transcriptional regulator 3 [Source:MGI Symbol;Acc:MGI:2685175]	Up	8.61447	0.277214	0	51.5	0.000303172	0.00403827
Depp1	DEPP1 autophagy regulator [Source:MGI Symbol;Acc:MGI:1918730]	Up	9.51863	1.13301	0	102.833	0.000303696	0.00404107
Deptor	DEP domain containing MTOR-interacting protein [Source:MGI Symbol;Acc:MGI:2146322]	Up	0.900271	7.48681	2135.8	6555.83	0.000303898	0.00404107
Arid3a	AT rich interactive domain 3A (BRIGHT-like) [Source:MGI Symbol;Acc:MGI:1328360]	Up	6.33321	0.227022	0.4	59.1667	0.000304752	0.00404521
Rps26	ribosomal protein S26 [Source:MGI Symbol;Acc:MGI:1351628]	Up	0.837922	9.79475	11019.2	34415.5	0.000304946	0.00404521
Usp11	ubiquitin specific peptidase 11 [Source:MGI Symbol;Acc:MGI:2384312]	Up	8.55727	0.227582	0	64.5	0.000304983	0.00404521
Rpl29	ribosomal protein L29 [Source:MGI Symbol;Acc:MGI:99687]	Up	0.770213	9.71879	10641.4	31774	0.000305366	0.00404687
Arhgap45	Rho GTPase activating protein 45 [Source:MGI Symbol;Acc:MGI:1917969]	Up	9.01669	0.654057	0	67.6667	0.000306642	0.00406035
Gm36423	predicted gene, 36423 [Source:MGI Symbol;Acc:MGI:5595582]	Up	6.77009	1.69745	0.6	143	0.000308198	0.00407751
Krt18	keratin 18 [Source:MGI Symbol;Acc:MGI:96692]	Up	0.670252	9.95395	13042	35260.3	0.00030854	0.0040786
Gm52253	#N/A	Up	8.26883	-0.0370647	0	51	0.000308889	0.00407977
Atf3	activating transcription factor 3 [Source:MGI Symbol;Acc:MGI:109384]	Down	-2.37904	4.05523	528.4	153	0.00030981	0.0040885
Slc7a8	solute carrier family 7 (cationic amino acid transporter, y+ system), member 8 [Source:MGI Symbol;Acc:MGI:1355323]	Up	9.07104	0.707026	0	79.8333	0.000311264	0.00410424
Pgam1	phosphoglycerate mutase 1 [Source:MGI Symbol;Acc:MGI:97552]	Down	-1.08959	5.99315	1647.2	1218.5	0.000312035	0.00411095
Col4a3	collagen, type IV, alpha 3 [Source:MGI Symbol;Acc:MGI:104688]	Up	7.46874	-0.743348	0	32.1667	0.000312623	0.00411524
Vti1b	vesicle transport through interaction with t-SNAREs 1B [Source:MGI Symbol;Acc:MGI:1855688]	Down	-0.992393	6.78634	2671.6	2287.33	0.000313312	0.00412085
Gm31088	#N/A	Up	8.25796	-0.0488285	0	47	0.000314145	0.00412761
Spint2	serine protease inhibitor, Kunitz type 2 [Source:MGI Symbol;Acc:MGI:1338031]	Up	0.789305	10.0786	13055.2	40216.8	0.000314572	0.00412761
Fam183b	family with sequence similarity 183, member B [Source:MGI Symbol;Acc:MGI:1922679]	Up	8.68151	0.341096	0	60.8333	0.000314615	0.00412761
9330182O14Rik	RIKEN cDNA 9330182O14 gene [Source:MGI Symbol;Acc:MGI:3045378]	Up	8.29931	-0.0127419	0	41.8333	0.000318055	0.00416925
Nab2	Ngfi-A binding protein 2 [Source:MGI Symbol;Acc:MGI:107563]	Up	8.54075	0.211019	0	56.3333	0.000319562	0.00418551
Rps21	ribosomal protein S21 [Source:MGI Symbol;Acc:MGI:1913731]	Up	1.0041	9.43477	7638.6	28575.3	0.000319932	0.00418687
Snai3	snail family zinc finger 3 [Source:MGI Symbol;Acc:MGI:1353563]	Up	8.29657	-0.0136575	0	47.3333	0.000321396	0.00420108
Pdlim4	PDZ and LIM domain 4 [Source:MGI Symbol;Acc:MGI:1353470]	Up	9.08766	0.7248	0	102.833	0.000322103	0.00420108
Cfap20dc	CFAP20 domain containing [Source:MGI Symbol;Acc:MGI:1926154]	Up	8.50888	0.180426	0	51.8333	0.000322178	0.00420108
Gimap3	GTPase, IMAP family member 3 [Source:MGI Symbol;Acc:MGI:1932723]	Up	8.61263	0.275013	0	50.1667	0.000322283	0.00420108
Coq8a	coenzyme Q8A [Source:MGI Symbol;Acc:MGI:1914676]	Up	3.25184	5.68178	174.4	2691.67	0.000322357	0.00420108
Rab7	RAB7, member RAS oncogene family [Source:MGI Symbol;Acc:MGI:105068]	Down	-0.857139	7.99069	5888.8	5388.67	0.000322862	0.00420418
Slpi	secretory leukocyte peptidase inhibitor [Source:MGI Symbol;Acc:MGI:109297]	Up	8.67518	0.337045	0	72.1667	0.000324125	0.00421712
Dpy19l3	dpy-19-like 3 (C. elegans) [Source:MGI Symbol;Acc:MGI:2443952]	Up	9.13449	0.769085	0	105.5	0.000326031	0.0042369
Itprip	inositol 1,4,5-triphosphate receptor interacting protein [Source:MGI Symbol;Acc:MGI:3042776]	Up	8.48663	0.160747	0	56.5	0.000326186	0.0042369
1700066M21Rik	RIKEN cDNA 1700066M21 gene [Source:MGI Symbol;Acc:MGI:1920717]	Up	9.01779	0.654821	0	67.3333	0.0003292	0.00427252
Hes6	hairy and enhancer of split 6 [Source:MGI Symbol;Acc:MGI:1859852]	Up	1.35873	6.63017	895	4181.33	0.000329559	0.00427365
Grb2	growth factor receptor bound protein 2 [Source:MGI Symbol;Acc:MGI:95805]	Down	-0.989959	6.35948	1945.4	1593.33	0.000332588	0.00430936
Pih1d1	PIH1 domain containing 1 [Source:MGI Symbol;Acc:MGI:1916095]	Up	1.20007	6.104	704	2761.67	0.00033332	0.00431528
Gnl3l	guanine nucleotide binding protein-like 3 (nucleolar)-like [Source:MGI Symbol;Acc:MGI:2448557]	Down	-1.65454	4.89665	781.8	421.5	0.000334716	0.00432979
Gde1	glycerophosphodiester phosphodiesterase 1 [Source:MGI Symbol;Acc:MGI:1891827]	Down	-1.28957	5.62203	1311	895.833	0.000334993	0.0043298
9930021J03Rik	RIKEN cDNA 9930021J03 gene [Source:MGI Symbol;Acc:MGI:2444398]	Up	1.51334	5.19238	303.2	1442.83	0.000336886	0.00435068
Uqcr10	ubiquinol-cytochrome c reductase, complex III subunit X [Source:MGI Symbol;Acc:MGI:1913402]	Up	0.821903	9.19499	6832.8	21900.5	0.000337614	0.00435649
Vwa3b	von Willebrand factor A domain containing 3B [Source:MGI Symbol;Acc:MGI:1918103]	Up	8.48895	0.164911	0	61.5	0.000338702	0.00436695
Gm17149	predicted gene 17149 [Source:MGI Symbol;Acc:MGI:4937976]	Up	8.4519	0.128367	0	49	0.000339451	0.00437292
Slco3a1	solute carrier organic anion transporter family, member 3a1 [Source:MGI Symbol;Acc:MGI:1351867]	Up	9.06251	0.698631	0	74.8333	0.000339723	0.00437292
9430060I03Rik	RIKEN cDNA 9430060I03 gene [Source:MGI Symbol;Acc:MGI:3702484]	Up	8.50271	0.17861	0	67.5	0.000340324	0.00437703
Defb45	defensin beta 45 [Source:MGI Symbol;Acc:MGI:3650541]	Up	9.6609	1.27323	0	171.833	0.0003406	0.00437703
Sptbn5	spectrin beta, non-erythrocytic 5 [Source:MGI Symbol;Acc:MGI:2685200]	Up	8.31946	0.00688668	0	49	0.000342398	0.00439653
Zranb1	zinc finger, RAN-binding domain containing 1 [Source:MGI Symbol;Acc:MGI:106441]	Up	1.32213	6.6947	972.4	4040	0.000344139	0.00441528
Tmem259	transmembrane protein 259 [Source:MGI Symbol;Acc:MGI:2177957]	Up	1.61977	7.50987	1325.8	7628.17	0.000346152	0.00443747
Gm38543	#N/A	Up	8.3993	0.0813047	0	54.1667	0.000348178	0.00445964
Gm35591	#N/A	Up	8.6494	0.311449	0	63	0.00034845	0.00445964
Ftsj3	FtsJ RNA methyltransferase homolog 3 (E. coli) [Source:MGI Symbol;Acc:MGI:1860295]	Up	1.59385	5.1131	278	1447.67	0.000348808	0.00446059
Il16	interleukin 16 [Source:MGI Symbol;Acc:MGI:1270855]	Up	8.53014	0.201499	0	57.1667	0.000349565	0.00446663
C330026H20Rik	#N/A	Up	9.12591	0.757909	0	74.6667	0.00035308	0.00450649
Uqcrc2	ubiquinol cytochrome c reductase core protein 2 [Source:MGI Symbol;Acc:MGI:1914253]	Down	-0.861581	7.81026	5026.8	4866.33	0.000353259	0.00450649
Lin7c	lin-7 homolog C, crumbs cell polarity complex component [Source:MGI Symbol;Acc:MGI:1330839]	Down	-0.98838	6.85784	2711	2242	0.000354546	0.004514
2610524H06Rik	#N/A	Up	8.74769	0.404351	0	76.3333	0.00035457	0.004514
Gsto1	glutathione S-transferase omega 1 [Source:MGI Symbol;Acc:MGI:1342273]	Up	0.655469	8.97882	10701.8	11714.7	0.00035471	0.004514
Esam	endothelial cell-specific adhesion molecule [Source:MGI Symbol;Acc:MGI:1916774]	Up	8.58387	0.253812	0	73	0.000355574	0.00452132
Neb	nebulin [Source:MGI Symbol;Acc:MGI:97292]	Up	8.44174	0.118793	0	50.5	0.000357643	0.00454394
1810024B03Rik	RIKEN cDNA 1810024B03 gene [Source:MGI Symbol;Acc:MGI:1925560]	Up	8.25709	-0.0488528	0	47.8333	0.000358474	0.00455082
Fads2	fatty acid desaturase 2 [Source:MGI Symbol;Acc:MGI:1930079]	Up	1.73075	7.05437	926.8	6380.83	0.000359465	0.00455971
Prss16	protease, serine 16 (thymus) [Source:MGI Symbol;Acc:MGI:1859181]	Up	8.96017	0.600867	0	67	0.00036031	0.00456674
Myl6b	myosin, light polypeptide 6B [Source:MGI Symbol;Acc:MGI:1917789]	Up	8.84098	0.490958	0	69.1667	0.000360939	0.00457102
Ppp2ca	protein phosphatase 2 (formerly 2A), catalytic subunit, alpha isoform [Source:MGI Symbol;Acc:MGI:1321159]	Down	-0.922197	7.74796	5146.8	4376.5	0.000361392	0.00457232
Gm32819	#N/A	Up	8.6004	0.265697	0	58.1667	0.000361624	0.00457232
Klf5	Kruppel-like factor 5 [Source:MGI Symbol;Acc:MGI:1338056]	Up	0.882978	10.0668	12645.4	39484	0.000363298	0.00458978
Lap3	leucine aminopeptidase 3 [Source:MGI Symbol;Acc:MGI:1914238]	Down	-0.965374	6.44574	2005.8	1822	0.000363977	0.00459466
Etv4	ets variant 4 [Source:MGI Symbol;Acc:MGI:99423]	Up	3.44322	4.82345	69	1471.17	0.000364797	0.00460131
Proser2	proline and serine rich 2 [Source:MGI Symbol;Acc:MGI:2442238]	Up	4.52019	4.26206	25.2	956.667	0.000365595	0.00460767
Boll	boule homolog, RNA binding protein [Source:MGI Symbol;Acc:MGI:1922638]	Up	8.50603	0.180308	0	62.6667	0.000367899	0.00463298
Cage1	cancer antigen 1 [Source:MGI Symbol;Acc:MGI:1918463]	Up	8.12712	-0.166381	0	42.6667	0.000368594	0.00463488
Ccdc92b	coiled-coil domain containing 92B [Source:MGI Symbol;Acc:MGI:3588240]	Down	-4.39621	3.86307	421.8	43.6667	0.00036864	0.00463488
Gm15455	predicted gene 15455 [Source:MGI Symbol;Acc:MGI:3705563]	Up	7.02979	-1.11201	0	20.5	0.000372071	0.00467427
Glg1	golgi apparatus protein 1 [Source:MGI Symbol;Acc:MGI:104967]	Up	1.32137	6.67846	884.4	3977.33	0.000372368	0.00467427
Muc2	mucin 2 [Source:MGI Symbol;Acc:MGI:1339364]	Up	1.24956	13.4935	109143	421131	0.000373289	0.00467851
Ccdc124	coiled-coil domain containing 124 [Source:MGI Symbol;Acc:MGI:1916403]	Up	0.945802	6.75704	1200.4	4010.33	0.000373303	0.00467851
Cphx1	cytoplasmic polyadenylated homeobox 1 [Source:MGI Symbol;Acc:MGI:2145733]	Up	9.47761	1.09682	0	147.5	0.000374652	0.00469168
Max	Max protein [Source:MGI Symbol;Acc:MGI:96921]	Down	-1.2805	6.17822	1890.4	1299.67	0.000375028	0.00469263
Ier5l	immediate early response 5-like [Source:MGI Symbol;Acc:MGI:1919750]	Up	8.26289	-0.0415025	0	54	0.000375849	0.00469289
Svs1	#N/A	Up	11.3704	2.94402	0	591.833	0.000375934	0.00469289
Psmb4	proteasome (prosome, macropain) subunit, beta type 4 [Source:MGI Symbol;Acc:MGI:1098257]	Up	0.92232	7.47367	2175.8	6986.5	0.000375956	0.00469289
D430001F17Rik	RIKEN cDNA D430001F17 gene [Source:MGI Symbol;Acc:MGI:2441973]	Up	8.45702	0.13212	0	51.5	0.000376245	0.00469289
1700020L24Rik	RIKEN cDNA 1700020L24 gene [Source:MGI Symbol;Acc:MGI:1913580]	Up	6.04897	2.24934	2.2	249	0.000377852	0.0047059
Gm46627	#N/A	Up	8.96823	0.608953	0	70.5	0.000377888	0.0047059
Gm36470	#N/A	Up	8.09454	-0.195114	0	43.5	0.000379003	0.00471604
Gm35760	#N/A	Up	8.70464	0.365172	0	75.8333	0.000379385	0.00471706
Gm36712	#N/A	Up	8.1568	-0.139363	0	47.3333	0.000380176	0.00472315
Actg2	actin, gamma 2, smooth muscle, enteric [Source:MGI Symbol;Acc:MGI:104589]	Down	-2.7603	3.40867	318.8	80.3333	0.000382432	0.00474742
Adhfe1	alcohol dehydrogenase, iron containing, 1 [Source:MGI Symbol;Acc:MGI:1923437]	Up	8.41597	0.094764	0	46.5	0.000383946	0.00476245
Sptbn4	spectrin beta, non-erythrocytic 4 [Source:MGI Symbol;Acc:MGI:1890574]	Up	8.13337	-0.163337	0	37.3333	0.00038574	0.00477671
Aph1c	aph1 homolog C, gamma secretase subunit [Source:MGI Symbol;Acc:MGI:1915568]	Up	8.39513	0.0779858	0	57.1667	0.00038596	0.00477671
Zfp607a	zinc finger protein 607A [Source:MGI Symbol;Acc:MGI:3584526]	Up	8.091	-0.199399	0	43.1667	0.000386384	0.00477671
LOC115488002	#N/A	Up	8.41214	0.0911417	0	48	0.000386419	0.00477671
Prx	periaxin [Source:MGI Symbol;Acc:MGI:108176]	Up	8.22864	-0.0760739	0	43.5	0.000386618	0.00477671
Csrp2	cysteine and glycine-rich protein 2 [Source:MGI Symbol;Acc:MGI:1202907]	Up	0.856846	8.44644	4338.8	13711.7	0.00039003	0.00481508
Chchd3	coiled-coil-helix-coiled-coil-helix domain containing 3 [Source:MGI Symbol;Acc:MGI:1913325]	Up	0.761297	7.57945	4340	4348.83	0.000392182	0.00483783
Gm6978	predicted gene 6978 [Source:MGI Symbol;Acc:MGI:3647254]	Up	8.66916	0.327369	0	53.5	0.000393203	0.00484662
Cox4i1	cytochrome c oxidase subunit 4I1 [Source:MGI Symbol;Acc:MGI:88473]	Up	0.637588	10.6482	21079.6	57300	0.000399072	0.0049151
Gm39000	#N/A	Up	8.88477	0.530867	0	68.8333	0.000401035	0.0049316
Dzip1	DAZ interacting protein 1 [Source:MGI Symbol;Acc:MGI:1914311]	Up	8.32073	0.0100509	0	54.3333	0.00040104	0.0049316
Gfra3	glial cell line derived neurotrophic factor family receptor alpha 3 [Source:MGI Symbol;Acc:MGI:1201403]	Up	8.29208	-0.0194688	0	43.5	0.000402124	0.00494106
Smarcd3	SWI/SNF related, matrix associated, actin dependent regulator of chromatin, subfamily d, member 3 [Source:MGI Symbol;Acc:MGI:1914243]	Up	7.88554	-0.381601	0	38.5	0.000403341	0.00495214
Prss53	protease, serine 53 [Source:MGI Symbol;Acc:MGI:2652890]	Up	8.45725	0.135428	0	62.5	0.000404024	0.00495664
Gm12830	predicted gene 12830 [Source:MGI Symbol;Acc:MGI:3649998]	Up	8.50155	0.171251	0	44.5	0.000408238	0.00500442
Slc1a3	solute carrier family 1 (glial high affinity glutamate transporter), member 3 [Source:MGI Symbol;Acc:MGI:99917]	Up	8.66689	0.326363	0	54.6667	0.000409291	0.00500979
1810062G17Rik	RIKEN cDNA 1810062G17 gene [Source:MGI Symbol;Acc:MGI:1919532]	Up	8.17501	-0.123416	0	46.1667	0.000409527	0.00500979
Atf7ip2	activating transcription factor 7 interacting protein 2 [Source:MGI Symbol;Acc:MGI:1922579]	Up	8.08623	-0.204329	0	41.8333	0.000409634	0.00500979
Slc30a2	solute carrier family 30 (zinc transporter), member 2 [Source:MGI Symbol;Acc:MGI:106637]	Up	7.79661	1.09172	0.2	99.5	0.000410037	0.00501082
Ppan	peter pan homolog [Source:MGI Symbol;Acc:MGI:2178445]	Up	3.10107	5.7491	215.2	2522.33	0.000411985	0.0050307
Chrnb1	cholinergic receptor, nicotinic, beta polypeptide 1 (muscle) [Source:MGI Symbol;Acc:MGI:87890]	Up	8.92184	0.569104	0	92.8333	0.000412676	0.00503523
Ccdc71l	coiled-coil domain containing 71 like [Source:MGI Symbol;Acc:MGI:1919373]	Down	-1.50244	5.52664	1253.2	726	0.000413736	0.00504423
LOC118568021	#N/A	Up	7.10632	0.642047	0.2	77.6667	0.000414566	0.0050499
Ndufb7	NADH:ubiquinone oxidoreductase subunit B7 [Source:MGI Symbol;Acc:MGI:1914166]	Up	0.98793	8.01494	3070.8	9571.67	0.000414844	0.0050499
Hotairm1	Hoxa transcript antisense RNA, myeloid-specific 1 [Source:MGI Symbol;Acc:MGI:3705155]	Up	8.99555	0.638051	0	94.1667	0.000415607	0.00505526
Gm52305	#N/A	Up	9.99706	1.59808	0	222.333	0.000417855	0.00507797
LOC115487891	#N/A	Up	8.13797	-0.158814	0	38.1667	0.000418121	0.00507797
Cyp4f41-ps	cytochrome P450, family 4, subfamily f, polypeptide 41 pseudogene [Source:MGI Symbol;Acc:MGI:1925125]	Up	8.00334	-0.279158	0	38.5	0.00041945	0.00509016
Cp	ceruloplasmin [Source:MGI Symbol;Acc:MGI:88476]	Up	9.25537	0.881851	0	87	0.000422327	0.00512112
Gm26685	predicted gene, 26685 [Source:MGI Symbol;Acc:MGI:5477179]	Up	8.1093	-0.181351	0	46	0.000423794	0.00513131
Gm52736	#N/A	Up	8.31964	0.00529348	0	41.5	0.000423821	0.00513131
H2ac4	H2A clustered histone 4 [Source:MGI Symbol;Acc:MGI:2448306]	Up	8.48105	0.152365	0	44	0.000425488	0.00514752
B130006D01Rik	#N/A	Up	7.88961	-0.37624	0	46.1667	0.000425906	0.00514861
Zfp39	zinc finger protein 39 [Source:MGI Symbol;Acc:MGI:99183]	Up	8.27195	-0.0346053	0	49.5	0.000430594	0.00520127
Kctd10	potassium channel tetramerisation domain containing 10 [Source:MGI Symbol;Acc:MGI:2141207]	Down	-1.30238	6.06498	1554.4	1121.67	0.000431864	0.00521259
Tmem176b	transmembrane protein 176B [Source:MGI Symbol;Acc:MGI:1916348]	Up	1.22702	6.14955	704.8	2900.5	0.000435821	0.00525632
Tas1r3	taste receptor, type 1, member 3 [Source:MGI Symbol;Acc:MGI:1933547]	Up	7.94121	-0.3314	0	41.8333	0.000438265	0.00528173
Gapdhs	glyceraldehyde-3-phosphate dehydrogenase, spermatogenic [Source:MGI Symbol;Acc:MGI:95653]	Up	8.21133	-0.0926228	0	39.6667	0.000438927	0.00528565
C920021L13Rik	RIKEN cDNA C920021L13 gene [Source:MGI Symbol;Acc:MGI:1923991]	Up	8.45581	0.131063	0	52.1667	0.000439936	0.00529373
Gm38970	#N/A	Up	8.6696	0.331577	0	69.5	0.000441267	0.00530568
Wsb2	WD repeat and SOCS box-containing 2 [Source:MGI Symbol;Acc:MGI:2144041]	Down	-0.906937	6.51384	2069.2	1900.5	0.000441989	0.0053103
LOC118567935	#N/A	Up	8.33987	0.0227789	0	40.3333	0.000442542	0.00531287
Gm36572	#N/A	Up	8.44919	0.12633	0	55	0.000443198	0.00531669
Stx1b	syntaxin 1B [Source:MGI Symbol;Acc:MGI:1930705]	Up	8.21583	-0.0871367	0	44.1667	0.000447099	0.00535938
Dcdc2b	doublecortin domain containing 2b [Source:MGI Symbol;Acc:MGI:2686212]	Up	8.26167	-0.046264	0	44.1667	0.000447567	0.0053609
Gm15663	predicted gene 15663 [Source:MGI Symbol;Acc:MGI:3783105]	Up	8.18744	-0.111342	0	50	0.000448326	0.00536589
Cers3	ceramide synthase 3 [Source:MGI Symbol;Acc:MGI:2681008]	Up	8.02587	-0.258429	0	41	0.000449324	0.0053721
0610040B10Rik	RIKEN cDNA 0610040B10 gene [Source:MGI Symbol;Acc:MGI:1914922]	Up	8.20223	-0.100125	0	45	0.000449529	0.0053721
Jaml	junction adhesion molecule like [Source:MGI Symbol;Acc:MGI:2685484]	Up	8.75321	0.404778	0	51.6667	0.000449903	0.00537247
Ppp1cb	protein phosphatase 1 catalytic subunit beta [Source:MGI Symbol;Acc:MGI:104871]	Down	-1.00317	7.26541	3567.4	2983.5	0.00045204	0.00539389
Gm33947	#N/A	Up	8.50037	0.172617	0	50.8333	0.000453034	0.00539835
4932438H23Rik	RIKEN cDNA 4932438H23 gene [Source:MGI Symbol;Acc:MGI:1921637]	Up	8.40384	0.0872753	0	60.1667	0.000453102	0.00539835
Lama4	laminin, alpha 4 [Source:MGI Symbol;Acc:MGI:109321]	Up	8.1604	-0.137742	0	42.6667	0.000453456	0.00539846
Il20rb	interleukin 20 receptor beta [Source:MGI Symbol;Acc:MGI:2143266]	Up	8.47656	0.153418	0	63.8333	0.0004539	0.00539965
Hoxd3	homeobox D3 [Source:MGI Symbol;Acc:MGI:96207]	Up	8.5736	0.240102	0	52	0.000455079	0.00540958
E230016M11Rik	RIKEN cDNA E230016M11 gene [Source:MGI Symbol;Acc:MGI:2443524]	Up	8.25742	-0.0468716	0	53.5	0.000456569	0.00542318
Carns1	carnosine synthase 1 [Source:MGI Symbol;Acc:MGI:2147595]	Up	8.51078	0.182037	0	52.3333	0.000457347	0.00542832
Gm11240	predicted gene 11240 [Source:MGI Symbol;Acc:MGI:3651058]	Up	8.60824	0.276083	0	72.3333	0.000458292	0.00543472
Fdft1	farnesyl diphosphate farnesyl transferase 1 [Source:MGI Symbol;Acc:MGI:102706]	Up	0.940254	6.88259	1392.6	4381.5	0.000458579	0.00543472
Pde4d	phosphodiesterase 4D, cAMP specific [Source:MGI Symbol;Acc:MGI:99555]	Up	1.90377	5.34278	267	1779.17	0.000459992	0.00544735
Fap	fibroblast activation protein [Source:MGI Symbol;Acc:MGI:109608]	Up	8.61226	0.277234	0	57.6667	0.000462145	0.00546872
Pik3ap1	phosphoinositide-3-kinase adaptor protein 1 [Source:MGI Symbol;Acc:MGI:1933177]	Up	8.26911	-0.0379906	0	46.1667	0.000462532	0.00546917
Ppp1r14c	protein phosphatase 1, regulatory inhibitor subunit 14C [Source:MGI Symbol;Acc:MGI:1923392]	Up	8.40729	0.0898318	0	57.8333	0.000463212	0.00547166
Pik3r2	phosphoinositide-3-kinase regulatory subunit 2 [Source:MGI Symbol;Acc:MGI:1098772]	Up	1.39498	5.6304	478.8	1955.83	0.00046344	0.00547166
Fbxl22	F-box and leucine-rich repeat protein 22 [Source:MGI Symbol;Acc:MGI:1921415]	Up	8.01071	-0.270961	0	39.5	0.000465765	0.00549498
Plekhf1	pleckstrin homology domain containing, family F (with FYVE domain) member 1 [Source:MGI Symbol;Acc:MGI:1919537]	Up	8.76035	0.413398	0	58.3333	0.000467633	0.00551287
Muc20	mucin 20 [Source:MGI Symbol;Acc:MGI:2385039]	Up	8.15303	-0.142742	0	43.8333	0.000468502	0.00551897
Gm28523	predicted gene 28523 [Source:MGI Symbol;Acc:MGI:5579229]	Up	8.12472	-0.16876	0	45.3333	0.000469031	0.00552106
Anapc2	anaphase promoting complex subunit 2 [Source:MGI Symbol;Acc:MGI:2139135]	Up	1.02464	6.34477	935.6	3083.67	0.00047285	0.00556183
Gm17251	predicted gene, 17251 [Source:MGI Symbol;Acc:MGI:4936885]	Up	6.4512	0.736336	0.6	99	0.000474184	0.00557335
Ahcyl2	S-adenosylhomocysteine hydrolase-like 2 [Source:MGI Symbol;Acc:MGI:1921590]	Down	-0.760809	7.88665	5208.4	5120.83	0.000475374	0.0055803
Mfsd4b4	major facilitator superfamily domain containing 4B4 [Source:MGI Symbol;Acc:MGI:3035041]	Up	7.95759	-0.320883	0	35.8333	0.000475486	0.0055803
Smkr-ps	smal lysine rich protein 1, pseudogene [Source:MGI Symbol;Acc:MGI:1923669]	Up	8.68644	0.342779	0	50.6667	0.000476433	0.00558586
Wnt2b	wingless-type MMTV integration site family, member 2B [Source:MGI Symbol;Acc:MGI:1261834]	Up	7.99713	-0.284868	0	38.6667	0.000476672	0.00558586
Timm50	translocase of inner mitochondrial membrane 50 [Source:MGI Symbol;Acc:MGI:1913775]	Up	1.30374	5.89171	594.4	2364.83	0.000478548	0.00560366
Ntmt1	N-terminal Xaa-Pro-Lys N-methyltransferase 1 [Source:MGI Symbol;Acc:MGI:1913867]	Up	1.79653	4.83037	209.4	1222.33	0.0004793	0.00560828
Chil6	chitinase-like 6 [Source:MGI Symbol;Acc:MGI:2682303]	Up	8.18068	-0.118195	0	43.8333	0.000482731	0.00564004
Zfp493	zinc finger protein 493 [Source:MGI Symbol;Acc:MGI:1920208]	Up	8.3184	0.00789776	0	53.1667	0.000482733	0.00564004
2810039B14Rik	RIKEN cDNA 2810039B14 gene [Source:MGI Symbol;Acc:MGI:1919915]	Up	8.29702	-0.0138515	0	47.3333	0.000483526	0.00564509
Polr2e	polymerase (RNA) II (DNA directed) polypeptide E [Source:MGI Symbol;Acc:MGI:1913670]	Up	0.908638	6.94005	1488.6	4511.17	0.000484105	0.00564765
Dzip3	DAZ interacting protein 3, zinc finger [Source:MGI Symbol;Acc:MGI:1917433]	Up	8.4979	0.171869	0	59.3333	0.000487022	0.00567648
Ppp1r1b	protein phosphatase 1, regulatory inhibitor subunit 1B [Source:MGI Symbol;Acc:MGI:94860]	Up	0.718566	8.15152	3575.8	10420.8	0.000487343	0.00567648
Denr	density-regulated protein [Source:MGI Symbol;Acc:MGI:1915434]	Up	0.93665	6.64383	1203.2	3811.5	0.000487662	0.00567648
Zfp296	zinc finger protein 296 [Source:MGI Symbol;Acc:MGI:1926956]	Up	7.90886	-0.360616	0	39.5	0.000488705	0.00568441
Reg3b	regenerating islet-derived 3 beta [Source:MGI Symbol;Acc:MGI:97478]	Down	-3.58854	7.03818	4269.6	619.5	0.000489443	0.00568877
Gm40181	#N/A	Up	8.38077	0.0624239	0	47.1667	0.000490368	0.00569531
Pgs1	phosphatidylglycerophosphate synthase 1 [Source:MGI Symbol;Acc:MGI:1921701]	Up	1.87337	4.98295	216.6	1245.67	0.000492964	0.00572122
Smad7	SMAD family member 7 [Source:MGI Symbol;Acc:MGI:1100518]	Down	-2.16179	4.20009	549.4	210.833	0.000493402	0.00572208
Prrg4	proline rich Gla (G-carboxyglutamic acid) 4 (transmembrane) [Source:MGI Symbol;Acc:MGI:2442211]	Up	8.76488	0.416349	0	55.3333	0.00049461	0.00573185
LOC115488070	#N/A	Up	8.09124	-0.200147	0	38	0.000496452	0.00574896
Gng2	guanine nucleotide binding protein (G protein), gamma 2 [Source:MGI Symbol;Acc:MGI:102705]	Up	8.04369	-0.239268	0	46.5	0.000498694	0.00576099
Gm25360	predicted gene, 25360 [Source:MGI Symbol;Acc:MGI:5455137]	Up	8.13217	-0.162098	0	42	0.000498783	0.00576099
Gmfg-ps	glia maturation factor, gamma, pseudogene [Source:MGI Symbol;Acc:MGI:3704264]	Up	5.09732	0.61732	1.2	82	0.000498885	0.00576099
Cap1	CAP, adenylate cyclase-associated protein 1 (yeast) [Source:MGI Symbol;Acc:MGI:88262]	Down	-0.859847	7.7786	4806	4487.67	0.000498961	0.00576099
Dbn1	drebrin 1 [Source:MGI Symbol;Acc:MGI:1931838]	Up	7.93624	-0.335328	0	42.8333	0.000500575	0.00577538
Rab26os	RAB26, member RAS oncogene family, opposite strand [Source:MGI Symbol;Acc:MGI:1922864]	Up	8.88467	0.53028	0	66	0.000501796	0.00578522
Acaa2	acetyl-Coenzyme A acyltransferase 2 (mitochondrial 3-oxoacyl-Coenzyme A thiolase) [Source:MGI Symbol;Acc:MGI:1098623]	Up	0.891824	7.8744	2668.8	8394.5	0.000502171	0.00578529
Perm1	PPARGC1 and ESRR induced regulator, muscle 1 [Source:MGI Symbol;Acc:MGI:1921433]	Up	8.08681	-0.203952	0	42.1667	0.0005035	0.00579416
Capn3	calpain 3 [Source:MGI Symbol;Acc:MGI:107437]	Up	7.83886	-0.424963	0	34.5	0.00050368	0.00579416
Arf6	ADP-ribosylation factor 6 [Source:MGI Symbol;Acc:MGI:99435]	Down	-1.05325	7.56783	4837.4	3652.5	0.000504183	0.00579571
Myl12a	myosin, light chain 12A, regulatory, non-sarcomeric [Source:MGI Symbol;Acc:MGI:1914518]	Down	-1.09385	7.01078	3423.4	2508.33	0.000504758	0.00579807
Flvcr1	feline leukemia virus subgroup C cellular receptor 1 [Source:MGI Symbol;Acc:MGI:2444881]	Up	8.37728	0.0613657	0	53.6667	0.000507374	0.00582297
Tspan4	tetraspanin 4 [Source:MGI Symbol;Acc:MGI:1928097]	Up	7.82102	-0.442856	0	29.6667	0.000507971	0.00582297
Tjp1	tight junction protein 1 [Source:MGI Symbol;Acc:MGI:98759]	Down	-1.05008	6.52167	2231.2	1675.5	0.00050804	0.00582297
Gsap	gamma-secretase activating protein [Source:MGI Symbol;Acc:MGI:2442259]	Up	8.44169	0.116698	0	47	0.000509934	0.00584042
Slc46a1	solute carrier family 46, member 1 [Source:MGI Symbol;Acc:MGI:1098733]	Up	8.00626	-0.27648	0	39.3333	0.000510555	0.00584327
Gm6644	predicted gene 6644 [Source:MGI Symbol;Acc:MGI:3644951]	Up	6.07825	-0.605283	0.2	29	0.000511937	0.00585481
Ndnf	neuron-derived neurotrophic factor [Source:MGI Symbol;Acc:MGI:1915419]	Up	7.93002	-0.342881	0	39.8333	0.000513915	0.00586958
Limd1	LIM domains containing 1 [Source:MGI Symbol;Acc:MGI:1352502]	Up	1.22238	6.03576	708.4	2517.67	0.000513976	0.00586958
Nefh	neurofilament, heavy polypeptide [Source:MGI Symbol;Acc:MGI:97309]	Up	8.6376	0.301258	0	61.6667	0.000514527	0.00587159
Dpf3	double PHD fingers 3 [Source:MGI Symbol;Acc:MGI:1917377]	Up	8.33628	0.022111	0	45.1667	0.000515386	0.00587713
Krt15	keratin 15 [Source:MGI Symbol;Acc:MGI:96689]	Up	7.89658	-0.369694	0	44.1667	0.000528054	0.0060172
Nipbl	NIPBL cohesin loading factor [Source:MGI Symbol;Acc:MGI:1913976]	Down	-1.18911	6.32149	1816.8	1497.33	0.000528792	0.00602124
Tfap2a	transcription factor AP-2, alpha [Source:MGI Symbol;Acc:MGI:104671]	Up	7.78136	-0.474283	0	35.8333	0.000531371	0.00604623
Nus1	NUS1 dehydrodolichyl diphosphate synthase subunit [Source:MGI Symbol;Acc:MGI:1196365]	Down	-0.937705	6.49924	2092.4	1742.33	0.000533575	0.0060669
Tmem17	transmembrane protein 17 [Source:MGI Symbol;Acc:MGI:2144205]	Up	8.25936	-0.0466018	0	51.8333	0.000534727	0.0060756
Nxn	nucleoredoxin [Source:MGI Symbol;Acc:MGI:109331]	Up	8.78014	0.433096	0	62.8333	0.000536105	0.00608684
Srrm2	serine/arginine repetitive matrix 2 [Source:MGI Symbol;Acc:MGI:1923206]	Down	-0.839429	8.2507	6495.8	6455.83	0.000539811	0.00612156
Slc22a13b	solute carrier family 22 (organic cation transporter), member 13b [Source:MGI Symbol;Acc:MGI:1924762]	Up	7.89902	-0.374034	0	31.1667	0.000539942	0.00612156
Gm34863	#N/A	Up	8.21225	-0.0887522	0	49.6667	0.000540956	0.00612862
Disp2	dispatched RND tramsporter family member 2 [Source:MGI Symbol;Acc:MGI:2388733]	Up	8.53349	0.206307	0	65.8333	0.000542227	0.00613859
Pmaip1	phorbol-12-myristate-13-acetate-induced protein 1 [Source:MGI Symbol;Acc:MGI:1930146]	Down	-2.46759	4.28267	566.6	201.833	0.000543554	0.00614918
Myo6	myosin VI [Source:MGI Symbol;Acc:MGI:104785]	Down	-0.935575	6.31534	1846.4	1583.67	0.00054417	0.00615171
Ccdc102a	coiled-coil domain containing 102A [Source:MGI Symbol;Acc:MGI:2686927]	Up	8.48121	0.155051	0	49.3333	0.000545544	0.0061628
S100a4	S100 calcium binding protein A4 [Source:MGI Symbol;Acc:MGI:1330282]	Up	8.87331	0.523378	0	90.5	0.000547353	0.00617618
Lifr	LIF receptor alpha [Source:MGI Symbol;Acc:MGI:96788]	Up	8.57643	0.247952	0	77.5	0.000547515	0.00617618
Zfp385a	zinc finger protein 385A [Source:MGI Symbol;Acc:MGI:1352495]	Up	8.82159	0.470057	0	59.5	0.000548065	0.00617794
Syne4	spectrin repeat containing, nuclear envelope family member 4 [Source:MGI Symbol;Acc:MGI:2141950]	Up	8.2048	-0.0960631	0	44.6667	0.000548844	0.00618227
Hnmt	histamine N-methyltransferase [Source:MGI Symbol;Acc:MGI:2153181]	Up	8.51393	0.184428	0	51.6667	0.000551358	0.00620559
Gm35339	predicted gene, 35339 [Source:MGI Symbol;Acc:MGI:5594498]	Up	8.65487	0.315474	0	56.3333	0.000551704	0.00620559
Noxo1	NADPH oxidase organizer 1 [Source:MGI Symbol;Acc:MGI:1919143]	Up	0.908817	7.28783	1792	5943.67	0.000554317	0.0062305
Olfm1	olfactomedin 1 [Source:MGI Symbol;Acc:MGI:1860437]	Up	8.23145	-0.0742982	0	42	0.000558176	0.00626939
Chmp1b	charged multivesicular body protein 1B [Source:MGI Symbol;Acc:MGI:1914314]	Down	-1.16762	6.50983	2341.8	1702.67	0.000561693	0.00630438
Noc2l	NOC2 like nucleolar associated transcriptional repressor [Source:MGI Symbol;Acc:MGI:1931051]	Up	1.28345	5.60024	433.6	1969.33	0.000562634	0.00631043
Cep164	centrosomal protein 164 [Source:MGI Symbol;Acc:MGI:2384878]	Down	-1.25767	5.78624	1313	998.5	0.000565613	0.00633931
Cd68	CD68 antigen [Source:MGI Symbol;Acc:MGI:88342]	Up	8.37789	0.0586895	0	45	0.000566279	0.00634225
Sp3	trans-acting transcription factor 3 [Source:MGI Symbol;Acc:MGI:1277166]	Down	-1.3377	5.47072	1110.4	717.833	0.000567121	0.00634714
Rpl36a	ribosomal protein L36A [Source:MGI Symbol;Acc:MGI:1201789]	Up	0.744776	9.29135	7893.2	23558.7	0.000570013	0.00637496
Gm30456	#N/A	Up	8.69794	0.352609	0	48.6667	0.000573079	0.00640469
Sdf2	stromal cell derived factor 2 [Source:MGI Symbol;Acc:MGI:108019]	Up	1.46176	5.5566	396.6	2097.33	0.000574552	0.00641658
H1f1	H1.1 linker histone, cluster member [Source:MGI Symbol;Acc:MGI:1931523]	Up	7.94521	-0.331466	0	37.5	0.000575661	0.0064244
Gm34821	predicted gene, 34821 [Source:MGI Symbol;Acc:MGI:5593980]	Up	8.2088	-0.0942139	0	43.8333	0.000576809	0.00643263
Septin7	septin 7 [Source:MGI Symbol;Acc:MGI:1335094]	Down	-1.01651	6.1143	1654.8	1335.17	0.000577869	0.00643912
Prr13	proline rich 13 [Source:MGI Symbol;Acc:MGI:1913401]	Up	0.836292	8.39078	7310.4	7379.5	0.000578212	0.00643912
Gm46560	predicted gene, 46560 [Source:MGI Symbol;Acc:MGI:5826197]	Up	7.99184	-0.288653	0	38.5	0.000579358	0.0064414
Rpl36	ribosomal protein L36 [Source:MGI Symbol;Acc:MGI:1860603]	Up	0.785692	9.53432	9220	28150.2	0.000579458	0.0064414
Aspscr1	alveolar soft part sarcoma chromosome region, candidate 1 (human) [Source:MGI Symbol;Acc:MGI:1916188]	Up	0.879731	6.78862	1262.4	3932.83	0.000579648	0.0064414
Klb	klotho beta [Source:MGI Symbol;Acc:MGI:1932466]	Up	8.7236	0.384454	0	85.8333	0.00058008	0.00644163
Abcc2	ATP-binding cassette, sub-family C (CFTR/MRP), member 2 [Source:MGI Symbol;Acc:MGI:1352447]	Up	7.85619	-0.410548	0	33.5	0.000581418	0.00645193
LOC118567604	#N/A	Up	8.19174	-0.105691	0	53.8333	0.000582079	0.0064547
Adgrv1	adhesion G protein-coupled receptor V1 [Source:MGI Symbol;Acc:MGI:1274784]	Up	8.2125	-0.088849	0	46.5	0.000583879	0.00647009
Scg5	secretogranin V [Source:MGI Symbol;Acc:MGI:98289]	Up	7.54759	-0.677197	0	29.8333	0.000585994	0.00648894
Gm38639	#N/A	Up	8.24845	-0.0551948	0	50.5	0.000587655	0.00650274
Gm46436	predicted gene, 46436 [Source:MGI Symbol;Acc:MGI:5826073]	Up	7.85987	-0.403767	0	40.6667	0.0005883	0.00650529
Rab8a	RAB8A, member RAS oncogene family [Source:MGI Symbol;Acc:MGI:96960]	Down	-0.984419	7.45125	4499.2	3474.83	0.000590331	0.00652076
Gm33272	#N/A	Up	8.20661	-0.099514	0	37.1667	0.000590529	0.00652076
Igha	immunoglobulin heavy constant alpha [Source:MGI Symbol;Acc:MGI:96444]	Down	-2.85611	4.27907	550.6	128.833	0.000591514	0.00652703
Tmem262	transmembrane protein 262 [Source:MGI Symbol;Acc:MGI:3690536]	Up	8.45528	0.131367	0	48.6667	0.000598553	0.00659935
Hk1	hexokinase 1 [Source:MGI Symbol;Acc:MGI:96103]	Up	0.883753	7.0163	1498	4695.83	0.000598909	0.00659935
Rps6ka5	ribosomal protein S6 kinase, polypeptide 5 [Source:MGI Symbol;Acc:MGI:1920336]	Up	8.30345	-0.00571408	0	52.5	0.000599618	0.00660253
Art5	ADP-ribosyltransferase 5 [Source:MGI Symbol;Acc:MGI:107948]	Up	8.58057	0.247515	0	54.5	0.000600796	0.00660972
Vsig1	V-set and immunoglobulin domain containing 1 [Source:MGI Symbol;Acc:MGI:1926039]	Up	8.10955	-0.181687	0	45.6667	0.000601441	0.00660972
Ogdhl	oxoglutarate dehydrogenase-like [Source:MGI Symbol;Acc:MGI:3616088]	Up	8.01682	-0.26694	0	39.6667	0.000601873	0.00660972
Arhgap6	Rho GTPase activating protein 6 [Source:MGI Symbol;Acc:MGI:1196332]	Up	8.10874	-0.181993	0	46.6667	0.000601956	0.00660972
Adora2b	adenosine A2b receptor [Source:MGI Symbol;Acc:MGI:99403]	Up	8.35342	0.0390058	0	48.6667	0.000607252	0.00666321
Fkbp14	FK506 binding protein 14 [Source:MGI Symbol;Acc:MGI:2387639]	Up	7.89314	-0.375141	0	37.5	0.000608493	0.00667216
LOC118568610	#N/A	Up	8.03687	-0.250233	0	36.5	0.000610441	0.00668885
Fgfr1	fibroblast growth factor receptor 1 [Source:MGI Symbol;Acc:MGI:95522]	Up	7.96844	-0.312831	0	32	0.000612221	0.00670367
Rhoa	ras homolog family member A [Source:MGI Symbol;Acc:MGI:1096342]	Down	-0.821662	8.48734	8288.4	7977	0.000614965	0.00672902
Armc3	armadillo repeat containing 3 [Source:MGI Symbol;Acc:MGI:1918132]	Up	8.5539	0.226431	0	74.6667	0.00062218	0.00680322
Gm33677	predicted gene, 33677 [Source:MGI Symbol;Acc:MGI:5592836]	Up	8.18926	-0.110218	0	44.1667	0.000623326	0.00681101
Gm12174	predicted gene 12174 [Source:MGI Symbol;Acc:MGI:3651722]	Up	1.91842	5.84244	415.6	2681.33	0.000625564	0.00683071
1700003I22Rik	RIKEN cDNA 1700003I22 gene [Source:MGI Symbol;Acc:MGI:1916606]	Up	7.66012	-0.583469	0	27	0.000626525	0.00683645
Gm41512	#N/A	Up	6.40449	-0.194853	0.2	52.5	0.000627499	0.00684231
Slc25a20	solute carrier family 25 (mitochondrial carnitine/acylcarnitine translocase), member 20 [Source:MGI Symbol;Acc:MGI:1928738]	Down	-1.15268	7.51444	4423.8	3116.83	0.000628077	0.00684386
Lurap1	leucine rich adaptor protein 1 [Source:MGI Symbol;Acc:MGI:1915325]	Up	7.98416	-0.293586	0	41.5	0.000631831	0.00687999
Pnmal1	#N/A	Up	7.91633	-0.355352	0	38.8333	0.000637122	0.00693231
Cdc42	cell division cycle 42 [Source:MGI Symbol;Acc:MGI:106211]	Down	-0.824154	8.02908	5962.4	5646.17	0.000638251	0.00693231
Cd74	CD74 antigen (invariant polypeptide of major histocompatibility complex, class II antigen-associated) [Source:MGI Symbol;Acc:MGI:96534]	Up	3.37365	5.46693	143.6	2213	0.00063834	0.00693231
Ndufs7	NADH:ubiquinone oxidoreductase core subunit S7 [Source:MGI Symbol;Acc:MGI:1922656]	Up	0.965174	7.509	1870	6782.83	0.000638403	0.00693231
Gm50340	predicted gene, 50340 [Source:MGI Symbol;Acc:MGI:6303216]	Up	7.70878	-0.540409	0	28.6667	0.000639509	0.00693952
Ywhae	tyrosine 3-monooxygenase/tryptophan 5-monooxygenase activation protein, epsilon polypeptide [Source:MGI Symbol;Acc:MGI:894689]	Down	-0.803724	8.49498	8507.4	7803.83	0.000641598	0.00695736
Grcc10	gene rich cluster, C10 gene [Source:MGI Symbol;Acc:MGI:1315201]	Up	0.947426	6.87897	1318	4662.5	0.000643879	0.00697728
LOC118567794	#N/A	Down	-4.21577	-1.63643	8.4	0.666667	0.000645544	0.0069905
Gm12191	predicted gene 12191 [Source:MGI Symbol;Acc:MGI:3651293]	Up	1.39628	5.84552	460.8	2414.17	0.000647041	0.00700147
Gm6654	predicted pseudogene 6654 [Source:MGI Symbol;Acc:MGI:3648118]	Up	6.96883	-1.16229	0	19	0.000647599	0.00700147
Gm30762	#N/A	Up	8.40302	0.0857196	0	56.1667	0.000647896	0.00700147
Plch2	phospholipase C, eta 2 [Source:MGI Symbol;Acc:MGI:2443078]	Up	2.01668	4.41232	150	970.833	0.000648448	0.00700261
4930579K19Rik	RIKEN cDNA 4930579K19 gene [Source:MGI Symbol;Acc:MGI:1923131]	Up	7.90126	-0.367613	0	40.1667	0.000654912	0.00706755
Rps20	ribosomal protein S20 [Source:MGI Symbol;Acc:MGI:1914677]	Up	0.745942	9.72163	11072	31862.2	0.000655765	0.0070719
Trim31	tripartite motif-containing 31 [Source:MGI Symbol;Acc:MGI:2385051]	Down	-1.33413	5.17911	914.6	646.833	0.00065635	0.00707335
Cfap126	cilia and flagella associated protein 126 [Source:MGI Symbol;Acc:MGI:1922722]	Up	7.85581	-0.408768	0	37	0.000661066	0.00711927
Gm40780	#N/A	Up	8.04113	-0.246595	0	35	0.000663166	0.00713558
Tmem182	transmembrane protein 182 [Source:MGI Symbol;Acc:MGI:1923725]	Up	7.57002	-0.658655	0	30.5	0.000663489	0.00713558
Cntd1	cyclin N-terminal domain containing 1 [Source:MGI Symbol;Acc:MGI:1923965]	Up	8.7829	0.438429	0	80.1667	0.000665356	0.00714645
Eif3d	eukaryotic translation initiation factor 3, subunit D [Source:MGI Symbol;Acc:MGI:1933181]	Up	0.800093	7.49962	2283.8	6767.83	0.000665411	0.00714645
Gm19437	predicted gene, 19437 [Source:MGI Symbol;Acc:MGI:5011622]	Up	8.63253	0.297387	0	68.8333	0.000671774	0.00720986
Gm39872	#N/A	Up	8.22955	-0.0765725	0	39.8333	0.000673158	0.00721977
C4a	complement component 4A (Rodgers blood group) [Source:MGI Symbol;Acc:MGI:98320]	Up	8.41049	0.0910513	0	56	0.000675059	0.00723171
Gper1	G protein-coupled estrogen receptor 1 [Source:MGI Symbol;Acc:MGI:1924104]	Up	7.93936	-0.332966	0	43.5	0.000675193	0.00723171
Plekha4	pleckstrin homology domain containing, family A (phosphoinositide binding specific) member 4 [Source:MGI Symbol;Acc:MGI:1916467]	Up	7.65038	-0.588828	0	31	0.000679839	0.00727329
Gm34939	predicted gene, 34939 [Source:MGI Symbol;Acc:MGI:5594098]	Up	5.16625	-0.0550851	0.6	40.1667	0.000680002	0.00727329
Prss30	protease, serine 30 [Source:MGI Symbol;Acc:MGI:1353645]	Down	-1.26945	6.80927	2934	1847.17	0.000681221	0.00728136
L3mbtl4	L3MBTL4 histone methyl-lysine binding protein [Source:MGI Symbol;Acc:MGI:2444889]	Up	7.57645	-0.651234	0	32.1667	0.000682216	0.00728704
Atp1a1	ATPase, Na+/K+ transporting, alpha 1 polypeptide [Source:MGI Symbol;Acc:MGI:88105]	Up	0.642321	9.9604	12918.2	35261.5	0.0006829	0.00728938
Tmed10	transmembrane p24 trafficking protein 10 [Source:MGI Symbol;Acc:MGI:1915831]	Up	0.755853	7.51484	3984	4114.67	0.000684607	0.00730262
Mnx1	motor neuron and pancreas homeobox 1 [Source:MGI Symbol;Acc:MGI:109160]	Up	7.96966	-0.307057	0	40.1667	0.000689814	0.00735317
4430402I18Rik	#N/A	Up	7.86857	-0.39673	0	39	0.000691355	0.00736284
Rcor2	REST corepressor 2 [Source:MGI Symbol;Acc:MGI:1859854]	Up	8.00297	-0.278232	0	37.8333	0.000692105	0.00736284
AI463170	expressed sequence AI463170 [Source:MGI Symbol;Acc:MGI:2144839]	Up	7.73156	-0.515949	0	36.8333	0.000692129	0.00736284
Sox18	SRY (sex determining region Y)-box 18 [Source:MGI Symbol;Acc:MGI:103559]	Up	7.82374	-0.438471	0	35.6667	0.000693803	0.00737565
Morf4l1	mortality factor 4 like 1 [Source:MGI Symbol;Acc:MGI:1096551]	Down	-0.926426	7.16749	3409.4	2976.83	0.000695047	0.00738388
LOC118567589	#N/A	Up	9.00207	0.638819	0	64.5	0.000696454	0.00739381
Gm42364	#N/A	Down	-4.29284	-1.21754	12.2	1	0.000697401	0.00739887
Larp1b	La ribonucleoprotein 1B [Source:MGI Symbol;Acc:MGI:1914604]	Down	-0.965239	6.4573	2115.6	1774.83	0.000698471	0.00740521
Rnf180	ring finger protein 180 [Source:MGI Symbol;Acc:MGI:1919066]	Up	8.05763	-0.228936	0	44.3333	0.000699705	0.00741273
Smim6	small integral membrane protein 6 [Source:MGI Symbol;Acc:MGI:1915778]	Up	1.02667	8.01445	2928.4	10509.7	0.000700125	0.00741273
Rnf186	ring finger protein 186 [Source:MGI Symbol;Acc:MGI:1914075]	Up	0.907228	7.29339	1739	6189.83	0.000703044	0.00743861
Gm45918	#N/A	Up	7.861	-0.404899	0	36.5	0.000705633	0.00745417
TrnG	#N/A	Down	-1.20409	6.47892	2033.6	1632.17	0.000705761	0.00745417
2900060B14Rik	RIKEN cDNA 2900060B14 gene [Source:MGI Symbol;Acc:MGI:1915454]	Up	8.02279	-0.260497	0	40.1667	0.00070594	0.00745417
Gm52392	#N/A	Up	8.05248	-0.237624	0	35.1667	0.000707017	0.00746017
Rps6ka6	ribosomal protein S6 kinase polypeptide 6 [Source:MGI Symbol;Acc:MGI:1914321]	Up	8.56425	0.231125	0	50.8333	0.000707459	0.00746017
Akr1c19	aldo-keto reductase family 1, member C19 [Source:MGI Symbol;Acc:MGI:2653678]	Down	-1.09367	7.49841	4133.6	3258.5	0.000711228	0.00749488
Pabpc1l	poly(A) binding protein, cytoplasmic 1-like [Source:MGI Symbol;Acc:MGI:1922908]	Up	8.02765	-0.260438	0	34.1667	0.000714088	0.00751997
Slu7	SLU7 splicing factor homolog (S. cerevisiae) [Source:MGI Symbol;Acc:MGI:2385598]	Down	-1.08028	6.52579	2287.6	1718.5	0.000715942	0.00753444
9030404E10Rik	RIKEN cDNA 9030404E10 gene [Source:MGI Symbol;Acc:MGI:1918778]	Up	8.78896	0.441721	0	64	0.000718232	0.00755347
Gm16907	#N/A	Down	-2.79185	4.08333	462.2	123.333	0.000719116	0.0075577
Bid	BH3 interacting domain death agonist [Source:MGI Symbol;Acc:MGI:108093]	Down	-2.28592	3.89539	491.4	154.667	0.000721138	0.00757388
Sars	seryl-aminoacyl-tRNA synthetase [Source:MGI Symbol;Acc:MGI:102809]	Up	0.793043	7.2246	1906.8	5465.33	0.000731259	0.00766578
mt-Rnr2	mitochondrially encoded 16S rRNA [Source:MGI Symbol;Acc:MGI:102492]	Down	-1.11996	15.6008	1.13515e+06	861390	0.000731683	0.00766578
Tcim	transcriptional and immune response regulator [Source:MGI Symbol;Acc:MGI:1916318]	Down	-1.11295	5.96867	1577.6	1177.5	0.000732175	0.00766578
Nkx6-3	NK6 homeobox 3 [Source:MGI Symbol;Acc:MGI:1921811]	Up	7.68886	-0.557096	0	30	0.000732311	0.00766578
Cd7	CD7 antigen [Source:MGI Symbol;Acc:MGI:88344]	Up	8.14861	-0.147778	0	40.8333	0.000732331	0.00766578
Rn7s2	7S RNA 2 [Source:MGI Symbol;Acc:MGI:97953]	Down	-3.10807	6.11168	1699.2	344	0.000733708	0.00767507
1700088E04Rik	RIKEN cDNA 1700088E04 gene [Source:MGI Symbol;Acc:MGI:1920774]	Up	7.46226	-0.754378	0	23.5	0.000734343	0.0076766
Gm13498	predicted gene 13498 [Source:MGI Symbol;Acc:MGI:3650381]	Up	7.78174	-0.474401	0	34	0.000737729	0.00770686
Sstr5	somatostatin receptor 5 [Source:MGI Symbol;Acc:MGI:894282]	Up	7.76085	-0.49271	0	34.6667	0.000745449	0.00778233
Gstt2	glutathione S-transferase, theta 2 [Source:MGI Symbol;Acc:MGI:106188]	Up	1.23955	6.24209	847	3068.67	0.00075836	0.00791185
Sh3yl1	Sh3 domain YSC-like 1 [Source:MGI Symbol;Acc:MGI:1346118]	Down	-1.21313	5.43698	1049.6	815.667	0.000767803	0.00800505
Mmp14	matrix metallopeptidase 14 (membrane-inserted) [Source:MGI Symbol;Acc:MGI:101900]	Up	1.45863	6.71838	821.8	4426	0.000768429	0.00800625
Gm33595	#N/A	Up	7.82982	-0.434455	0	31.3333	0.000769855	0.00801578
Gnpnat1	glucosamine-phosphate N-acetyltransferase 1 [Source:MGI Symbol;Acc:MGI:1858963]	Down	-1.18759	6.56865	2181.4	1740.83	0.000775119	0.00806524
Ltb4r1	leukotriene B4 receptor 1 [Source:MGI Symbol;Acc:MGI:1309472]	Up	7.87727	-0.387448	0	41.6667	0.00077794	0.00808924
Galnt10	polypeptide N-acetylgalactosaminyltransferase 10 [Source:MGI Symbol;Acc:MGI:1890480]	Up	0.883985	7.09042	1604.2	4953.67	0.000779112	0.00809605
LOC118567854	#N/A	Up	7.64045	-0.600138	0	28.1667	0.00078081	0.00810833
Oga	O-GlcNAcase [Source:MGI Symbol;Acc:MGI:1932139]	Up	1.10549	6.15559	690	2665.33	0.000782209	0.00811749
Homer2	homer scaffolding protein 2 [Source:MGI Symbol;Acc:MGI:1347354]	Down	-1.29075	5.91607	1399.4	980.333	0.000783408	0.00812456
Cacng4	calcium channel, voltage-dependent, gamma subunit 4 [Source:MGI Symbol;Acc:MGI:1859167]	Up	8.26048	-0.0471186	0	44	0.000784037	0.00812571
Mtss2	MTSS I-BAR domain containing 2 [Source:MGI Symbol;Acc:MGI:3039591]	Up	8.324	0.00931914	0	42	0.000785701	0.00813554
Srpx2	sushi-repeat-containing protein, X-linked 2 [Source:MGI Symbol;Acc:MGI:1916042]	Up	8.28758	-0.0173519	0	61	0.000786022	0.00813554
Smagp	small cell adhesion glycoprotein [Source:MGI Symbol;Acc:MGI:2448476]	Down	-0.901442	7.40293	3763.8	3602	0.000790425	0.00817571
Ackr3	atypical chemokine receptor 3 [Source:MGI Symbol;Acc:MGI:109562]	Up	8.56092	0.226264	0	47	0.000800215	0.00826625
Kcnh7	potassium voltage-gated channel, subfamily H (eag-related), member 7 [Source:MGI Symbol;Acc:MGI:2159566]	Up	8.22859	-0.0775419	0	43.6667	0.000800623	0.00826625
D430020J02Rik	RIKEN cDNA D430020J02 gene [Source:MGI Symbol;Acc:MGI:2442237]	Up	8.01588	-0.267387	0	38	0.000800758	0.00826625
Gnl1	guanine nucleotide binding protein-like 1 [Source:MGI Symbol;Acc:MGI:95764]	Up	1.13101	6.04257	766	2594.83	0.000801296	0.00826636
Plin4	perilipin 4 [Source:MGI Symbol;Acc:MGI:1929709]	Up	7.65336	-0.5897	0	26.8333	0.000802737	0.00827453
Rgn	regucalcin [Source:MGI Symbol;Acc:MGI:108024]	Up	7.57717	-0.651798	0	32.6667	0.000803142	0.00827453
Gm32719	#N/A	Up	7.9572	-0.320441	0	34.6667	0.000804727	0.00828541
Glyctk	glycerate kinase [Source:MGI Symbol;Acc:MGI:2444085]	Up	7.88832	-0.380721	0	35.8333	0.000805778	0.00828612
Tmem190	transmembrane protein 190 [Source:MGI Symbol;Acc:MGI:1925302]	Up	7.98471	-0.296638	0	34.3333	0.000805852	0.00828612
Dsp	desmoplakin [Source:MGI Symbol;Acc:MGI:109611]	Down	-0.886575	8.18207	6606.6	5842.67	0.000807493	0.00829498
Spred3	sprouty-related EVH1 domain containing 3 [Source:MGI Symbol;Acc:MGI:2142186]	Up	7.7578	-0.498417	0	29.5	0.000807771	0.00829498
Dhx16	DEAH (Asp-Glu-Ala-His) box polypeptide 16 [Source:MGI Symbol;Acc:MGI:1916442]	Up	1.47747	5.34695	381.6	1654.17	0.000819197	0.00840682
Cd247	CD247 antigen [Source:MGI Symbol;Acc:MGI:88334]	Up	7.7113	-0.534648	0	34.5	0.000819751	0.008407
Esr1	estrogen receptor 1 (alpha) [Source:MGI Symbol;Acc:MGI:1352467]	Up	7.85006	-0.413945	0	37.3333	0.000825649	0.00846196
Ftl1	ferritin light polypeptide 1 [Source:MGI Symbol;Acc:MGI:95589]	Up	0.694396	11.594	67332.4	68308.3	0.000826275	0.00846284
Atp2a2	ATPase, Ca++ transporting, cardiac muscle, slow twitch 2 [Source:MGI Symbol;Acc:MGI:88110]	Up	1.34431	6.14598	680.8	2805.5	0.00082885	0.00848369
Ptprf	protein tyrosine phosphatase, receptor type, F [Source:MGI Symbol;Acc:MGI:102695]	Up	1.05601	7.25042	1497.8	6090	0.000839969	0.00859189
Zfp108	zinc finger protein 108 [Source:MGI Symbol;Acc:MGI:1891198]	Up	7.97963	-0.296728	0	43.1667	0.000840927	0.00859608
Efnb3	ephrin B3 [Source:MGI Symbol;Acc:MGI:109196]	Up	7.4895	-0.72887	0	28	0.000841751	0.0085989
Tesmin	testis expressed metallothionein like [Source:MGI Symbol;Acc:MGI:1340029]	Up	8.36314	0.0460615	0	44.6667	0.000842406	0.00859999
Gm26808	#N/A	Up	7.5295	-0.696643	0	24.8333	0.000845007	0.00862072
Gm33023	predicted gene, 33023 [Source:MGI Symbol;Acc:MGI:5592182]	Up	7.11038	-1.05058	0	19.1667	0.000845535	0.00862072
Gm17669	predicted gene, 17669 [Source:MGI Symbol;Acc:MGI:4937303]	Up	5.26694	-0.321538	0.6	36.1667	0.000846653	0.00862218
Fhl1	four and a half LIM domains 1 [Source:MGI Symbol;Acc:MGI:1298387]	Down	-1.32975	6.40504	2021.6	1651.83	0.000846778	0.00862218
Syngap1	synaptic Ras GTPase activating protein 1 homolog (rat) [Source:MGI Symbol;Acc:MGI:3039785]	Up	8.10187	-0.188442	0	44.1667	0.000849632	0.00864564
Gm12059	predicted gene 12059 [Source:MGI Symbol;Acc:MGI:3649372]	Up	7.69096	-0.557383	0	29	0.000853412	0.00867848
Vegfc	vascular endothelial growth factor C [Source:MGI Symbol;Acc:MGI:109124]	Up	8.34042	0.0322159	0	69.1667	0.000855627	0.00869471
Ccni	cyclin I [Source:MGI Symbol;Acc:MGI:1341077]	Down	-0.990734	8.19379	7152.2	6087.67	0.000856116	0.00869471
Ier5	immediate early response 5 [Source:MGI Symbol;Acc:MGI:1337072]	Down	-1.2926	5.26419	951.2	644.667	0.00085947	0.00872312
Stpg1	sperm tail PG rich repeat containing 1 [Source:MGI Symbol;Acc:MGI:1926056]	Up	7.68119	-0.567171	0	25.8333	0.000861081	0.00873382
Prkcb	protein kinase C, beta [Source:MGI Symbol;Acc:MGI:97596]	Up	7.56587	-0.663989	0	27.8333	0.000862703	0.00874462
Gm6793	predicted gene 6793 [Source:MGI Symbol;Acc:MGI:3643578]	Up	4.80153	-0.377113	0.6	38.3333	0.000864059	0.00875271
Gm46218	predicted gene, 46218 [Source:MGI Symbol;Acc:MGI:5825855]	Up	8.0711	-0.219341	0	39.8333	0.000869052	0.00879683
Gm32952	#N/A	Down	-4.53076	-0.40498	20.8	1.5	0.000869535	0.00879683
Gm31566	#N/A	Up	7.43094	-0.778525	0	27.6667	0.000870763	0.00879824
Jund	jun D proto-oncogene [Source:MGI Symbol;Acc:MGI:96648]	Up	0.689726	8.50595	7849.8	8096.67	0.000870796	0.00879824
Gm52912	#N/A	Up	7.65145	-0.588211	0	31.1667	0.000877402	0.00885927
Gpr179	G protein-coupled receptor 179 [Source:MGI Symbol;Acc:MGI:2443409]	Up	7.31418	-0.879518	0	21.6667	0.000878621	0.00886588
Mlec	malectin [Source:MGI Symbol;Acc:MGI:1924015]	Up	0.762695	8.34945	4037.8	12064	0.000882335	0.00889763
Selenos	selenoprotein S [Source:MGI Symbol;Acc:MGI:95994]	Up	0.951283	6.70676	1268.6	4089.5	0.000883029	0.00889891
Adssl1	adenylosuccinate synthetase like 1 [Source:MGI Symbol;Acc:MGI:87947]	Up	7.80618	-0.453039	0	35.3333	0.000884742	0.00891046
Gm30732	#N/A	Up	7.96532	-0.307772	0	47.8333	0.000887502	0.00893252
Gm24339	predicted gene, 24339 [Source:MGI Symbol;Acc:MGI:5454116]	Up	7.83699	-0.426548	0	35.5	0.000889666	0.00894856
Fam83h	family with sequence similarity 83, member H [Source:MGI Symbol;Acc:MGI:2145900]	Up	1.3475	5.77423	536.2	2238.5	0.00089346	0.00898097
Rit1	Ras-like without CAAX 1 [Source:MGI Symbol;Acc:MGI:108053]	Down	-1.12201	5.99924	1506.2	1228.67	0.000900807	0.00904902
Phlda2	pleckstrin homology like domain, family A, member 2 [Source:MGI Symbol;Acc:MGI:1202307]	Up	7.87302	-0.394476	0	36	0.000903768	0.00907295
Arhgef17	Rho guanine nucleotide exchange factor (GEF) 17 [Source:MGI Symbol;Acc:MGI:2673002]	Up	8.27468	-0.030048	0	58.1667	0.000907991	0.00910951
Bfar	bifunctional apoptosis regulator [Source:MGI Symbol;Acc:MGI:1914368]	Up	1.39176	6.35937	697.6	3486.67	0.000908652	0.00911032
Srp14	signal recognition particle 14 [Source:MGI Symbol;Acc:MGI:107169]	Down	-1.22839	5.89951	1417	1100.33	0.000914345	0.00916155
Mettl7a3	methyltransferase like 7A3 [Source:MGI Symbol;Acc:MGI:3710670]	Up	6.51937	1.21956	0.6	157.167	0.000915892	0.0091712
Ovgp1	oviductal glycoprotein 1 [Source:MGI Symbol;Acc:MGI:106661]	Up	8.33968	0.0300733	0	64.1667	0.000916902	0.00917545
Gm44026	predicted gene, 44026 [Source:MGI Symbol;Acc:MGI:5690418]	Up	5.93133	0.0155927	0.4	42	0.000935621	0.0093568
Podxl	podocalyxin-like [Source:MGI Symbol;Acc:MGI:1351317]	Up	8.53561	0.207122	0	57.8333	0.000936443	0.00935907
A630001G21Rik	RIKEN cDNA A630001G21 gene [Source:MGI Symbol;Acc:MGI:2443131]	Up	8.83469	0.487856	0	94.3333	0.000938581	0.00937446
Cnih2	cornichon family AMPA receptor auxiliary protein 2 [Source:MGI Symbol;Acc:MGI:1277225]	Up	8.0963	-0.198463	0	35.3333	0.000939254	0.00937521
Gm50341	predicted gene, 50341 [Source:MGI Symbol;Acc:MGI:6303218]	Up	7.88985	-0.37891	0	35.1667	0.00094246	0.00940124
Gm40869	#N/A	Up	6.65597	-0.116868	0.2	37.8333	0.000944067	0.00941128
Etfa	electron transferring flavoprotein, alpha polypeptide [Source:MGI Symbol;Acc:MGI:106092]	Down	-0.793705	7.18566	3307.4	3209.83	0.000945286	0.00941745
Gm52214	#N/A	Up	8.43344	0.108288	0	43.3333	0.000947054	0.00942473
Elovl1	elongation of very long chain fatty acids (FEN1/Elo2, SUR4/Elo3, yeast)-like 1 [Source:MGI Symbol;Acc:MGI:1858959]	Up	1.19318	6.03921	665.2	2576.83	0.000947218	0.00942473
Foxn1	forkhead box N1 [Source:MGI Symbol;Acc:MGI:102949]	Up	7.74739	-0.505479	0	33.6667	0.000950181	0.00944822
Myh14	myosin, heavy polypeptide 14 [Source:MGI Symbol;Acc:MGI:1919210]	Up	0.774558	8.66586	5043.6	13886	0.000954371	0.00948128
Il10rb	interleukin 10 receptor, beta [Source:MGI Symbol;Acc:MGI:109380]	Down	-1.09138	5.91043	1503	1171.5	0.000954714	0.00948128
Sp5	trans-acting transcription factor 5 [Source:MGI Symbol;Acc:MGI:1927715]	Up	8.33653	0.018366	0	38.3333	0.000955421	0.0094823
Gm34589	predicted gene, 34589 [Source:MGI Symbol;Acc:MGI:5593748]	Up	7.81023	-0.447172	0	40	0.000957967	0.00949488
2010106C02Rik	RIKEN cDNA 2010106C02 gene [Source:MGI Symbol;Acc:MGI:1919354]	Up	7.7354	-0.515487	0	31	0.000958243	0.00949488
Gm35219	#N/A	Up	8.06583	-0.223294	0	37.3333	0.000958504	0.00949488
A230072C01Rik	RIKEN cDNA A230072C01 gene [Source:MGI Symbol;Acc:MGI:2444644]	Up	7.51075	-0.711554	0	25.3333	0.000959192	0.0094957
Rtl8a	retrotransposon Gag like 8A [Source:MGI Symbol;Acc:MGI:1913408]	Up	8.01505	-0.267998	0	40.6667	0.000962742	0.00952483
Crk	v-crk avian sarcoma virus CT10 oncogene homolog [Source:MGI Symbol;Acc:MGI:88508]	Down	-1.07002	6.53177	2273.4	1748.33	0.000963741	0.00952871
Caprin1	cell cycle associated protein 1 [Source:MGI Symbol;Acc:MGI:1858234]	Down	-0.792594	7.43764	3788.6	3712.83	0.000966555	0.00955051
Snrpd2	small nuclear ribonucleoprotein D2 [Source:MGI Symbol;Acc:MGI:98345]	Up	1.01246	6.79215	1105.2	4272.17	0.000971993	0.0095982
Ap3m2	adaptor-related protein complex 3, mu 2 subunit [Source:MGI Symbol;Acc:MGI:1929214]	Up	7.72924	-0.518807	0	37.3333	0.000977623	0.00964772
Pnn	pinin [Source:MGI Symbol;Acc:MGI:1100514]	Up	1.35294	5.67354	451.8	2006.33	0.000980102	0.00966611
Stxbp2	syntaxin binding protein 2 [Source:MGI Symbol;Acc:MGI:107370]	Up	0.701577	7.42021	2182.8	6056.17	0.000982427	0.00968295
Gm52515	#N/A	Up	7.65912	-0.584575	0	27	0.000983445	0.00968691
4833439L19Rik	RIKEN cDNA 4833439L19 gene [Source:MGI Symbol;Acc:MGI:1921162]	Down	-0.759691	7.69125	4703	4403.5	0.000985062	0.00969577
Mecr	mitochondrial trans-2-enoyl-CoA reductase [Source:MGI Symbol;Acc:MGI:1349441]	Up	1.2069	6.88004	1050.2	5043.33	0.000985581	0.00969577
Fam174c	family with sequence similarity 174, member C [Source:MGI Symbol;Acc:MGI:1917020]	Up	5.75411	3.51721	5.6	601.5	0.000991503	0.00974792
Tgfb1	transforming growth factor, beta 1 [Source:MGI Symbol;Acc:MGI:98725]	Up	5.73061	2.87045	3.6	371.667	0.00099696	0.00979543
Cybrd1	cytochrome b reductase 1 [Source:MGI Symbol;Acc:MGI:2654575]	Down	-3.93623	-1.63235	7.6	0.833333	0.000999511	0.00980965
Ccnl2	cyclin L2 [Source:MGI Symbol;Acc:MGI:1927119]	Up	2.51762	6.01332	366.6	3049.5	0.000999658	0.00980965
Cd300lf	CD300 molecule like family member F [Source:MGI Symbol;Acc:MGI:2442359]	Up	8.14255	-0.153531	0	39.8333	0.00100145	0.00982105
Ano10	anoctamin 10 [Source:MGI Symbol;Acc:MGI:2143103]	Up	1.2869	5.99897	565.6	2569.83	0.00100533	0.00985303
Sorl1	sortilin-related receptor, LDLR class A repeats-containing [Source:MGI Symbol;Acc:MGI:1202296]	Up	1.6331	5.47278	383.8	1940.17	0.00100724	0.00986552
Zfp52	zinc finger protein 52 [Source:MGI Symbol;Acc:MGI:99199]	Up	7.88035	-0.386953	0	35.8333	0.00100893	0.00987594
Fbxo16	F-box protein 16 [Source:MGI Symbol;Acc:MGI:1354706]	Up	7.25705	-0.923921	0	25.1667	0.00101086	0.0098887
Ubtd2	ubiquitin domain containing 2 [Source:MGI Symbol;Acc:MGI:2444752]	Up	8.08253	-0.207295	0	39.1667	0.00101354	0.00990873
Morn3	MORN repeat containing 3 [Source:MGI Symbol;Acc:MGI:1922140]	Up	7.32812	-0.863101	0	26.8333	0.00101644	0.00992593
Ndufs3	NADH:ubiquinone oxidoreductase core subunit S3 [Source:MGI Symbol;Acc:MGI:1915599]	Up	0.755454	7.18897	1826.4	5347.33	0.00101657	0.00992593
Zfp773	zinc finger protein 773 [Source:MGI Symbol;Acc:MGI:1923623]	Up	7.96524	-0.308952	0	44.1667	0.00101798	0.00993358
Map1lc3b	microtubule-associated protein 1 light chain 3 beta [Source:MGI Symbol;Acc:MGI:1914693]	Down	-0.830653	7.15275	3280.8	3102.5	0.00101946	0.00994178
Cyp2d13	cytochrome P450, family 2, subfamily d, polypeptide 13 [Source:MGI Symbol;Acc:MGI:88605]	Up	8.10965	-0.188383	0	32.5	0.00102133	0.00995231
Gabre	gamma-aminobutyric acid (GABA) A receptor, subunit epsilon [Source:MGI Symbol;Acc:MGI:1330235]	Up	7.83703	-0.426822	0	32.1667	0.00102181	0.00995231
Gm51897	#N/A	Down	-3.04269	4.08953	508.4	97.3333	0.00102406	0.00996804
Eef1a1	eukaryotic translation elongation factor 1 alpha 1 [Source:MGI Symbol;Acc:MGI:1096881]	Up	0.686739	12.9898	181164	194261	0.0010254	0.00997492
Klhdc4	kelch domain containing 4 [Source:MGI Symbol;Acc:MGI:2384569]	Up	1.19058	5.94461	654.2	2398.17	0.00103191	0.010032
Mbnl1	muscleblind like splicing factor 1 [Source:MGI Symbol;Acc:MGI:1928482]	Up	0.985242	6.33815	898	3077	0.00103295	0.010036
Gm10602	predicted gene 10602 [Source:MGI Symbol;Acc:MGI:3708759]	Up	7.36955	-0.829056	0	26.5	0.00103483	0.010048
Crip1	cysteine-rich protein 1 (intestinal) [Source:MGI Symbol;Acc:MGI:88501]	Up	0.864717	8.97066	5703.8	19721.7	0.00103548	0.0100481
Foxd2os	forkhead box D2, opposite strand [Source:MGI Symbol;Acc:MGI:2444065]	Up	1.10729	6.38088	875.4	3078.5	0.00103665	0.0100532
Ifitm2	interferon induced transmembrane protein 2 [Source:MGI Symbol;Acc:MGI:1933382]	Up	0.797655	6.86347	1390.4	4285.83	0.00104846	0.0101615
Copg1	coatomer protein complex, subunit gamma 1 [Source:MGI Symbol;Acc:MGI:1858696]	Up	0.91496	6.91964	1290.4	4509.83	0.00105048	0.0101748
Lif	leukemia inhibitory factor [Source:MGI Symbol;Acc:MGI:96787]	Up	8.07376	-0.213751	0	43.3333	0.00105281	0.010191
LOC118568397	#N/A	Up	7.77732	-0.479472	0	33	0.0010551	0.0102069
4921507P07Rik	RIKEN cDNA 4921507P07 gene [Source:MGI Symbol;Acc:MGI:1918071]	Up	7.9162	-0.352403	0	44	0.00105949	0.010243
Rpl18a	ribosomal protein L18A [Source:MGI Symbol;Acc:MGI:1924058]	Up	0.714161	10.6372	20681	60203	0.00106601	0.0102997
Actr6	ARP6 actin-related protein 6 [Source:MGI Symbol;Acc:MGI:1914269]	Up	7.79237	-0.467671	0	29.6667	0.0010721	0.0103522
D330023K18Rik	RIKEN cDNA D330023K18 gene [Source:MGI Symbol;Acc:MGI:2445152]	Up	8.33264	0.0178139	0	44.5	0.00107292	0.0103537
Eif3b	eukaryotic translation initiation factor 3, subunit B [Source:MGI Symbol;Acc:MGI:106478]	Up	0.751924	8.19495	3827.4	10470.3	0.00107583	0.0103754
Rps28	ribosomal protein S28 [Source:MGI Symbol;Acc:MGI:1859516]	Up	0.758956	8.81538	5500	17314.8	0.00108034	0.0104061
Pgls	6-phosphogluconolactonase [Source:MGI Symbol;Acc:MGI:1913421]	Up	0.691912	8.02454	3296.8	9167.17	0.00108034	0.0104061
Cracr2b	calcium release activated channel regulator 2B [Source:MGI Symbol;Acc:MGI:2446129]	Up	1.06287	5.84119	628.8	2287.83	0.0010812	0.010408
Cox10	heme A:farnesyltransferase cytochrome c oxidase assembly factor 10 [Source:MGI Symbol;Acc:MGI:1917633]	Up	1.04003	6.17183	790.6	2583.83	0.00108213	0.0104101
Ptprd	protein tyrosine phosphatase, receptor type, D [Source:MGI Symbol;Acc:MGI:97812]	Up	1.6197	6.18315	547.2	3069.17	0.00108274	0.0104101
Plscr1	phospholipid scramblase 1 [Source:MGI Symbol;Acc:MGI:893575]	Down	-1.09939	6.56166	2512.2	1794.33	0.00108363	0.0104122
Gm41029	#N/A	Up	8.55473	0.225617	0	63.3333	0.00108619	0.0104305
Lpl	lipoprotein lipase [Source:MGI Symbol;Acc:MGI:96820]	Down	-2.45648	4.56567	599.2	207.833	0.00108822	0.0104435
Fam83c	family with sequence similarity 83, member C [Source:MGI Symbol;Acc:MGI:1918655]	Up	7.63722	-0.60366	0	27.1667	0.00108968	0.0104512
Rpsa	ribosomal protein SA [Source:MGI Symbol;Acc:MGI:105381]	Up	0.698674	11.9236	49437	146028	0.00109152	0.0104625
Fcgrt	Fc fragment of IgG receptor and transporter [Source:MGI Symbol;Acc:MGI:103017]	Up	1.4725	6.26465	721.8	3070.5	0.0010954	0.010491
Ifi44	interferon-induced protein 44 [Source:MGI Symbol;Acc:MGI:2443016]	Up	7.51617	-0.700884	0	34.3333	0.00109584	0.010491
Cox7b	cytochrome c oxidase subunit 7B [Source:MGI Symbol;Acc:MGI:1913392]	Up	0.660789	8.7847	9379	10458.8	0.00110108	0.0105348
Nr3c1	nuclear receptor subfamily 3, group C, member 1 [Source:MGI Symbol;Acc:MGI:95824]	Down	-1.07589	5.98377	1600.6	1209.33	0.00110435	0.0105596
Unc13a	unc-13 homolog A [Source:MGI Symbol;Acc:MGI:3051532]	Up	7.45207	-0.755992	0	32.5	0.00110675	0.0105762
Lypd8	LY6/PLAUR domain containing 8 [Source:MGI Symbol;Acc:MGI:1917413]	Up	0.691938	11.8671	78146.4	89254.5	0.00111175	0.0106174
Gm46382	#N/A	Up	8.05519	-0.236822	0	32	0.00111521	0.01064
Nckap5	NCK-associated protein 5 [Source:MGI Symbol;Acc:MGI:2686394]	Up	7.85729	-0.408449	0	33	0.00111547	0.01064
Renbp	renin binding protein [Source:MGI Symbol;Acc:MGI:105940]	Up	7.80836	-0.448786	0	38.1667	0.00113236	0.0107946
LOC118568762	#N/A	Up	5.13723	0.463093	1.4	69.3333	0.00114135	0.0108737
Gm31713	#N/A	Up	8.59624	0.267593	0	85.1667	0.00114499	0.0109018
Thop1	thimet oligopeptidase 1 [Source:MGI Symbol;Acc:MGI:1354165]	Up	1.01389	5.88518	653.6	2255	0.00114582	0.010903
Iars2	isoleucine-tRNA synthetase 2, mitochondrial [Source:MGI Symbol;Acc:MGI:1919586]	Up	1.36002	6.46576	780.2	3593	0.001149	0.0109266
Clps	colipase, pancreatic [Source:MGI Symbol;Acc:MGI:88421]	Down	-1.73516	5.87336	1511.8	909.167	0.00115035	0.0109329
Gne	glucosamine (UDP-N-acetyl)-2-epimerase/N-acetylmannosamine kinase [Source:MGI Symbol;Acc:MGI:1354951]	Up	0.742546	8.61011	4886.2	14588.3	0.00115399	0.0109609
Dgkz	diacylglycerol kinase zeta [Source:MGI Symbol;Acc:MGI:1278339]	Down	-0.872828	6.46492	2038.2	1783	0.00115643	0.0109741
Gm31728	predicted gene, 31728 [Source:MGI Symbol;Acc:MGI:5590887]	Up	7.29726	-0.891261	0	24.6667	0.00115679	0.0109741
Sspo	SCO-spondin [Source:MGI Symbol;Acc:MGI:2674311]	Up	8.58859	0.254631	0	54.1667	0.00116461	0.0110417
Ubc	ubiquitin C [Source:MGI Symbol;Acc:MGI:98889]	Up	0.770082	7.41525	2121.6	6142.83	0.00116947	0.0110759
Cyp11a1	cytochrome P450, family 11, subfamily a, polypeptide 1 [Source:MGI Symbol;Acc:MGI:88582]	Up	7.54256	-0.68145	0	29.8333	0.00116964	0.0110759
Slc39a4	solute carrier family 39 (zinc transporter), member 4 [Source:MGI Symbol;Acc:MGI:1919277]	Down	-0.91394	6.93341	2924.6	2608.5	0.00117288	0.0110999
Maz	MYC-associated zinc finger protein (purine-binding transcription factor) [Source:MGI Symbol;Acc:MGI:1338823]	Up	0.92711	6.18432	871.4	2759.33	0.00118369	0.0111955
Taz	#N/A	Up	1.63243	5.18391	256	1599.33	0.00118506	0.0112017
Asap3	ArfGAP with SH3 domain, ankyrin repeat and PH domain 3 [Source:MGI Symbol;Acc:MGI:2684986]	Up	8.22264	-0.0757751	0	60.1667	0.00119206	0.0112611
C230035I16Rik	RIKEN cDNA C230035I16 gene [Source:MGI Symbol;Acc:MGI:2444850]	Up	7.5197	-0.700197	0	31.5	0.00119473	0.0112795
Cetn3	centrin 3 [Source:MGI Symbol;Acc:MGI:1097706]	Down	-1.09416	6.00993	1631.8	1289.17	0.00120186	0.01134
Rpn2	ribophorin II [Source:MGI Symbol;Acc:MGI:98085]	Up	0.732587	8.22812	3977.4	10721.7	0.00120778	0.011389
Syap1	synapse associated protein 1 [Source:MGI Symbol;Acc:MGI:1914293]	Down	-1.14983	5.80606	1312	1018.83	0.00121073	0.01141
Vegfd	vascular endothelial growth factor D [Source:MGI Symbol;Acc:MGI:108037]	Up	7.68733	-0.562136	0	26.6667	0.00121452	0.0114388
Gm41926	#N/A	Up	9.93831	1.53984	0	179.5	0.00121743	0.0114593
Bcl10	B cell leukemia/lymphoma 10 [Source:MGI Symbol;Acc:MGI:1337994]	Down	-1.17103	5.99932	1621.8	1192.5	0.00121895	0.0114668
Dmrta2os	doublesex and mab-3 related transcription factor like family A2, opposite strand [Source:MGI Symbol;Acc:MGI:1924703]	Up	7.41008	-0.797264	0	24.6667	0.00122071	0.0114764
Capzb	capping actin protein of muscle Z-line subunit beta [Source:MGI Symbol;Acc:MGI:104652]	Down	-0.703049	8.55646	8277	8199.17	0.00122283	0.0114895
Prmt1	protein arginine N-methyltransferase 1 [Source:MGI Symbol;Acc:MGI:107846]	Up	1.25667	5.88053	619.8	2390.83	0.00122625	0.0115147
Tom1l1	target of myb1-like 1 (chicken) [Source:MGI Symbol;Acc:MGI:1919193]	Down	-1.30205	6.22052	2030.2	1256.17	0.0012302	0.0115332
Ptprn	protein tyrosine phosphatase, receptor type, N [Source:MGI Symbol;Acc:MGI:102765]	Up	7.18574	-0.982856	0	23.6667	0.00123071	0.0115332
Etv1	ets variant 1 [Source:MGI Symbol;Acc:MGI:99254]	Up	7.79296	-0.464699	0	35.8333	0.00123097	0.0115332
Glyr1	glyoxylate reductase 1 homolog (Arabidopsis) [Source:MGI Symbol;Acc:MGI:1921272]	Down	-1.13567	6.50058	2176	1688.33	0.00123116	0.0115332
Wdr78	#N/A	Up	7.76107	-0.49352	0	30.6667	0.0012429	0.0116363
Serpinb1a	serine (or cysteine) peptidase inhibitor, clade B, member 1a [Source:MGI Symbol;Acc:MGI:1913472]	Up	0.768665	8.24661	6653.8	7088.17	0.00125598	0.0117517
H1f5	H1.5 linker histone, cluster member [Source:MGI Symbol;Acc:MGI:1861461]	Up	8.15578	-0.146037	0	35.6667	0.00126121	0.0117936
Cfap47	cilia and flagella associated protein 47 [Source:MGI Symbol;Acc:MGI:3781475]	Up	7.70646	-0.543223	0	29.6667	0.00126225	0.0117963
Gm5848	#N/A	Up	4.65444	1.45385	3	134.333	0.00126316	0.0117977
Prune2	prune homolog 2 [Source:MGI Symbol;Acc:MGI:1925004]	Up	8.23163	-0.0755518	0	38.6667	0.00126399	0.0117985
Cspg5	chondroitin sulfate proteoglycan 5 [Source:MGI Symbol;Acc:MGI:1352747]	Up	7.29358	-0.892583	0	27.3333	0.00127252	0.011871
Gm51455	#N/A	Up	8.61048	0.27467	0	54.1667	0.00127711	0.0119068
Pof1b	premature ovarian failure 1B [Source:MGI Symbol;Acc:MGI:1916943]	Down	-1.11247	6.19349	1797.6	1390.17	0.00128173	0.0119428
Zdhhc20	zinc finger, DHHC domain containing 20 [Source:MGI Symbol;Acc:MGI:1923215]	Up	1.21657	5.84595	587.6	2254.33	0.00128269	0.0119447
Creb3l2	cAMP responsive element binding protein 3-like 2 [Source:MGI Symbol;Acc:MGI:2442695]	Up	7.50486	-0.712791	0	30	0.00128394	0.0119492
Dusp4	dual specificity phosphatase 4 [Source:MGI Symbol;Acc:MGI:2442191]	Up	7.88722	-0.38394	0	32	0.00129363	0.0120322
Hint1	histidine triad nucleotide binding protein 1 [Source:MGI Symbol;Acc:MGI:1321133]	Up	0.860472	8.75164	5191.8	17339.2	0.00129817	0.0120646
Rab5if	RAB5 interacting factor [Source:MGI Symbol;Acc:MGI:1914638]	Up	1.09612	6.2963	859.2	3226.83	0.00129864	0.0120646
Slc44a1	solute carrier family 44, member 1 [Source:MGI Symbol;Acc:MGI:2140592]	Up	1.05937	7.01998	1370.8	5312.67	0.00130359	0.0121034
Ern2	endoplasmic reticulum (ER) to nucleus signalling 2 [Source:MGI Symbol;Acc:MGI:1349436]	Up	0.902172	6.69744	1157.4	3697.67	0.00131356	0.0121887
Fcer1g	Fc receptor, IgE, high affinity I, gamma polypeptide [Source:MGI Symbol;Acc:MGI:95496]	Up	7.2598	-0.926055	0	20.5	0.00131583	0.0122026
Ubl3	ubiquitin-like 3 [Source:MGI Symbol;Acc:MGI:1344373]	Down	-0.936123	6.33118	1890.6	1659.67	0.00131867	0.0122216
Gm20275	predicted gene, 20275 [Source:MGI Symbol;Acc:MGI:5012460]	Up	7.02243	0.451842	0.2	79.8333	0.00133036	0.0123227
Sh3bgrl3	SH3 domain binding glutamic acid-rich protein-like 3 [Source:MGI Symbol;Acc:MGI:1920973]	Up	0.980146	7.66235	2458.2	7747.17	0.00133359	0.0123454
LOC115490496	#N/A	Up	7.2888	-0.90103	0	21.1667	0.00134132	0.0124096
6330415G19Rik	RIKEN cDNA 6330415G19 gene [Source:MGI Symbol;Acc:MGI:2443182]	Up	7.77085	-0.484967	0	31.3333	0.0013491	0.0124742
Pcbp1	poly(rC) binding protein 1 [Source:MGI Symbol;Acc:MGI:1345635]	Up	0.715616	7.77305	4978	5107.83	0.00135546	0.0125257
Fars2	phenylalanine-tRNA synthetase 2 (mitochondrial) [Source:MGI Symbol;Acc:MGI:1917205]	Up	1.01353	5.71912	588.8	2015.17	0.00136249	0.0125831
Gm36402	#N/A	Up	5.74963	1.44242	1	126	0.00136466	0.0125959
Ist1	increased sodium tolerance 1 homolog (yeast) [Source:MGI Symbol;Acc:MGI:1919205]	Down	-1.30342	6.051	1606.6	1127.33	0.00136633	0.0126038
Comt	catechol-O-methyltransferase [Source:MGI Symbol;Acc:MGI:88470]	Up	1.19386	6.254	722.8	3084	0.00136924	0.0126232
Decr1	2,4-dienoyl CoA reductase 1, mitochondrial [Source:MGI Symbol;Acc:MGI:1914710]	Up	0.943057	6.79458	1342.2	4222.5	0.00137128	0.0126346
Tmem183a	transmembrane protein 183A [Source:MGI Symbol;Acc:MGI:1914729]	Up	0.70093	7.3868	3645	3785.5	0.00137254	0.0126388
Oasl2	2'-5' oligoadenylate synthetase-like 2 [Source:MGI Symbol;Acc:MGI:1344390]	Down	-2.18245	4.05022	477.6	192.167	0.00137587	0.012662
Usp5	ubiquitin specific peptidase 5 (isopeptidase T) [Source:MGI Symbol;Acc:MGI:1347343]	Up	1.15674	6.07777	713.8	2676.83	0.00137785	0.0126728
Gm28609	predicted gene 28609 [Source:MGI Symbol;Acc:MGI:5579315]	Up	7.72916	-0.524778	0	27.1667	0.00138983	0.0127755
Mir682	microRNA 682 [Source:MGI Symbol;Acc:MGI:3629911]	Up	1.0459	6.58521	1004.6	3832.83	0.00139543	0.0128195
Ctsa	cathepsin A [Source:MGI Symbol;Acc:MGI:97748]	Up	1.00313	7.06295	1489.8	5172	0.00139656	0.0128223
Pnrc1	proline-rich nuclear receptor coactivator 1 [Source:MGI Symbol;Acc:MGI:1917838]	Down	-1.15423	6.08998	1743.2	1318.67	0.00140253	0.0128697
Rnf40	ring finger protein 40 [Source:MGI Symbol;Acc:MGI:2142048]	Up	0.88924	6.50899	1057.2	3288.17	0.00140678	0.0129011
Clstn1	calsyntenin 1 [Source:MGI Symbol;Acc:MGI:1929895]	Up	0.965485	6.99923	1534.2	4676.5	0.00141231	0.0129443
Rnf10	ring finger protein 10 [Source:MGI Symbol;Acc:MGI:1859162]	Down	-0.755029	8.0055	5738.8	5441	0.00141472	0.0129588
Fam193b	family with sequence similarity 193, member B [Source:MGI Symbol;Acc:MGI:2385851]	Up	2.79569	5.31943	141.8	1886.33	0.00141708	0.0129728
C5ar2	complement component 5a receptor 2 [Source:MGI Symbol;Acc:MGI:2442013]	Down	-5.38438	-0.585377	16.6	0.666667	0.00142009	0.0129861
Gbp7	guanylate binding protein 7 [Source:MGI Symbol;Acc:MGI:2444421]	Up	6.81109	-1.28749	0	17.5	0.00142019	0.0129861
Rcn3	reticulocalbin 3, EF-hand calcium binding domain [Source:MGI Symbol;Acc:MGI:1277122]	Up	7.17865	-0.992189	0	20	0.00142296	0.0130039
9330159M07Rik	RIKEN cDNA 9330159M07 gene [Source:MGI Symbol;Acc:MGI:2442519]	Up	7.61883	-0.615643	0	31.3333	0.0014262	0.0130259
Trpm4	transient receptor potential cation channel, subfamily M, member 4 [Source:MGI Symbol;Acc:MGI:1915917]	Up	0.867008	7.72628	2451.8	7473.83	0.00142865	0.0130407
Gm25188	predicted gene, 25188 [Source:MGI Symbol;Acc:MGI:5454965]	Up	8.43359	0.106504	0	39.5	0.00143181	0.0130619
Ndufb11	NADH:ubiquinone oxidoreductase subunit B11 [Source:MGI Symbol;Acc:MGI:1349919]	Up	0.807407	7.03136	1554.8	4995.33	0.00144306	0.013157
Nsun7	NOL1/NOP2/Sun domain family, member 7 [Source:MGI Symbol;Acc:MGI:1918168]	Up	7.16722	-0.996218	0	26.5	0.00145339	0.0132428
Cd3d	CD3 antigen, delta polypeptide [Source:MGI Symbol;Acc:MGI:88331]	Up	7.13328	-1.03023	0	19.1667	0.00145464	0.0132428
Snhg5	small nucleolar RNA host gene 5 [Source:MGI Symbol;Acc:MGI:1919905]	Up	5.55318	3.78556	7.8	772.5	0.00145501	0.0132428
Nop53	NOP53 ribosome biogenesis factor [Source:MGI Symbol;Acc:MGI:2154441]	Up	0.705154	8.1569	3737.2	10348.8	0.00145588	0.013243
Gm12258	predicted gene 12258 [Source:MGI Symbol;Acc:MGI:3651534]	Up	7.19977	-0.972126	0	22.6667	0.00146705	0.0133301
Sprr2a2	small proline-rich protein 2A2 [Source:MGI Symbol;Acc:MGI:3845026]	Down	-1.67421	4.86514	844.2	397.333	0.00146716	0.0133301
Idh2	isocitrate dehydrogenase 2 (NADP+), mitochondrial [Source:MGI Symbol;Acc:MGI:96414]	Up	0.823542	7.98686	3055.2	9370.33	0.00146869	0.0133364
Gm41556	predicted gene, 41556 [Source:MGI Symbol;Acc:MGI:5624441]	Down	-8.52792	-0.0658483	29.2	0	0.00147087	0.0133485
Smim1	small integral membrane protein 1 [Source:MGI Symbol;Acc:MGI:1916109]	Up	7.99006	-0.291578	0	39.5	0.00147204	0.0133513
Lyzl4	lysozyme-like 4 [Source:MGI Symbol;Acc:MGI:1916282]	Up	7.33255	-0.862016	0	24.1667	0.00148442	0.0134558
Rplp1	ribosomal protein, large, P1 [Source:MGI Symbol;Acc:MGI:1927099]	Up	0.619502	10.7308	22863.2	61756.3	0.00148993	0.0134914
Snord35a	small nucleolar RNA, C/D box 35A [Source:MGI Symbol;Acc:MGI:1351319]	Up	7.39389	-0.80971	0	26.3333	0.00149007	0.0134914
Slc26a8	solute carrier family 26, member 8 [Source:MGI Symbol;Acc:MGI:2385046]	Down	-3.92716	1.56557	97	9.5	0.00150946	0.0136592
Bscl2	Berardinelli-Seip congenital lipodystrophy 2 (seipin) [Source:MGI Symbol;Acc:MGI:1298392]	Up	1.27289	5.34652	390.4	1703.5	0.00151074	0.0136628
Pcdh18	protocadherin 18 [Source:MGI Symbol;Acc:MGI:1920423]	Up	7.79264	-0.465434	0	32	0.00151188	0.0136652
Gm52129	#N/A	Up	6.79961	2.16033	1.6	191.333	0.00151456	0.0136816
Wdr93	WD repeat domain 93 [Source:MGI Symbol;Acc:MGI:3646885]	Up	7.26454	-0.920202	0	22.1667	0.0015181	0.0137002
Sertad4	SERTA domain containing 4 [Source:MGI Symbol;Acc:MGI:2443496]	Up	7.78818	-0.474143	0	27.6667	0.00151843	0.0137002
H3c4	H3 clustered histone 4 [Source:MGI Symbol;Acc:MGI:2448322]	Up	8.03268	-0.258373	0	30.3333	0.00151924	0.0137002
Krt14	keratin 14 [Source:MGI Symbol;Acc:MGI:96688]	Up	7.47998	-0.742213	0	22.6667	0.00152943	0.0137842
Slc34a1	solute carrier family 34 (sodium phosphate), member 1 [Source:MGI Symbol;Acc:MGI:1345284]	Up	8.46697	0.142015	0	49.8333	0.0015335	0.0138129
Syp	synaptophysin [Source:MGI Symbol;Acc:MGI:98467]	Up	8.26913	-0.0408836	0	40.1667	0.00153546	0.0138227
C4bp-ps1	complement component 4 binding protein, pseudogene 1 [Source:MGI Symbol;Acc:MGI:99594]	Up	7.62804	-0.608005	0	31.6667	0.00153762	0.0138342
Gm36818	#N/A	Up	7.40034	-0.806869	0	24.5	0.00154049	0.013852
A430005L14Rik	RIKEN cDNA A430005L14 gene [Source:MGI Symbol;Acc:MGI:2140680]	Up	1.3854	5.04274	305.8	1345.83	0.00154743	0.0139065
Setd3	SET domain containing 3 [Source:MGI Symbol;Acc:MGI:1289184]	Down	-0.842755	7.04211	3011.6	2798.67	0.00154941	0.0139163
Fbxo17	F-box protein 17 [Source:MGI Symbol;Acc:MGI:1354707]	Up	7.31286	-0.876381	0	26.1667	0.00155122	0.0139246
Nudc	nudC nuclear distribution protein [Source:MGI Symbol;Acc:MGI:106014]	Up	1.39377	6.8167	1143	4663.5	0.00155548	0.0139549
Gm35486	#N/A	Down	-3.69419	3.00028	238.8	28.1667	0.00156039	0.0139909
Rtf1	RTF1, Paf1/RNA polymerase II complex component [Source:MGI Symbol;Acc:MGI:1309480]	Down	-0.89018	7.91926	5214.4	4928.83	0.00156557	0.0140293
Gm41640	#N/A	Up	7.76274	-0.494042	0	29	0.00157382	0.0140952
Ttll11	tubulin tyrosine ligase-like family, member 11 [Source:MGI Symbol;Acc:MGI:1921660]	Up	8.2178	-0.0899177	0	37	0.00157686	0.0141144
Cbs	cystathionine beta-synthase [Source:MGI Symbol;Acc:MGI:88285]	Up	0.928499	6.7335	1142	3951	0.00158199	0.0141512
Sfn	stratifin [Source:MGI Symbol;Acc:MGI:1891831]	Up	0.728242	8.00528	5576.6	5592	0.00158278	0.0141512
Arf5	ADP-ribosylation factor 5 [Source:MGI Symbol;Acc:MGI:99434]	Up	0.647205	8.35801	4265.4	11531.5	0.00159718	0.0142718
Gpihbp1	GPI-anchored HDL-binding protein 1 [Source:MGI Symbol;Acc:MGI:1915703]	Up	7.09038	-1.06565	0	19.1667	0.00159872	0.0142775
H2ac19	H2A clustered histone 19 [Source:MGI Symbol;Acc:MGI:2448283]	Up	4.95046	-0.288298	0.6	38.8333	0.00160022	0.0142813
Gm46178	#N/A	Down	-3.75275	2.68008	175.2	24	0.00160097	0.0142813
Gm15743	predicted gene 15743 [Source:MGI Symbol;Acc:MGI:3783185]	Up	7.75315	-0.505601	0	27	0.00160541	0.0143127
Rnf141	ring finger protein 141 [Source:MGI Symbol;Acc:MGI:1914400]	Down	-1.05691	5.75885	1331.6	1080.17	0.00160998	0.0143454
AI837181	expressed sequence AI837181 [Source:MGI Symbol;Acc:MGI:2147598]	Up	1.62446	5.27503	300.2	1640.5	0.00162147	0.0144395
Nrbf2	nuclear receptor binding factor 2 [Source:MGI Symbol;Acc:MGI:1354950]	Down	-1.94112	4.19883	461.2	231.333	0.0016345	0.0145473
Gng13	guanine nucleotide binding protein (G protein), gamma 13 [Source:MGI Symbol;Acc:MGI:1925616]	Up	7.401	-0.805969	0	23	0.00164726	0.0146526
Mlx	MAX-like protein X [Source:MGI Symbol;Acc:MGI:108398]	Down	-1.56495	5.32855	994.4	563.167	0.00165494	0.0147125
Gm51999	#N/A	Up	8.73267	0.388813	0	61.3333	0.00166073	0.0147556
Rab24	RAB24, member RAS oncogene family [Source:MGI Symbol;Acc:MGI:105065]	Up	1.54675	6.04804	555	2742.83	0.00166607	0.0147947
Sart1	squamous cell carcinoma antigen recognized by T cells 1 [Source:MGI Symbol;Acc:MGI:1309453]	Up	1.09958	6.6393	1176	3822.33	0.00166828	0.014806
Gm30445	#N/A	Up	6.49521	-0.264308	0.2	36.5	0.00167163	0.0148273
Fam114a2	family with sequence similarity 114, member A2 [Source:MGI Symbol;Acc:MGI:1917629]	Up	1.1382	6.46434	989	3421.5	0.00167388	0.0148389
Srek1	splicing regulatory glutamine/lysine-rich protein 1 [Source:MGI Symbol;Acc:MGI:2145245]	Down	-0.840748	6.33414	1726.6	1695.67	0.00167811	0.014868
Gm39167	#N/A	Up	8.01484	-0.265611	0	43.1667	0.0016807	0.0148825
Gstm1	glutathione S-transferase, mu 1 [Source:MGI Symbol;Acc:MGI:95860]	Up	0.632484	8.27816	4122.8	11105.5	0.00168616	0.0149222
Ptms	parathymosin [Source:MGI Symbol;Acc:MGI:1916452]	Up	0.679098	9.13451	7566.4	20246.8	0.00168708	0.0149222
Kcnh2	potassium voltage-gated channel, subfamily H (eag-related), member 2 [Source:MGI Symbol;Acc:MGI:1341722]	Up	5.21363	0.819365	1.8	84.3333	0.00169028	0.014941
Kcnq1	potassium voltage-gated channel, subfamily Q, member 1 [Source:MGI Symbol;Acc:MGI:108083]	Up	1.28145	5.8957	626.4	2429.17	0.00169111	0.014941
Misp	mitotic spindle positioning [Source:MGI Symbol;Acc:MGI:1926156]	Down	-0.680712	9.13889	12704.8	12693.5	0.0016926	0.0149457
1810013A23Rik	#N/A	Up	8.24456	-0.063157	0	39.8333	0.00169354	0.0149457
Rbms3	RNA binding motif, single stranded interacting protein [Source:MGI Symbol;Acc:MGI:2444477]	Up	9.60759	1.21907	0	109	0.00169524	0.0149522
Pla2g4c	phospholipase A2, group IVC (cytosolic, calcium-independent) [Source:MGI Symbol;Acc:MGI:1196403]	Down	-7.70845	3.64676	449	4.83333	0.00169887	0.0149758
Rasgef1a	RasGEF domain family, member 1A [Source:MGI Symbol;Acc:MGI:1917977]	Up	7.20637	-0.967051	0	24.6667	0.00170816	0.0150493
B3galt5	UDP-Gal:betaGlcNAc beta 1,3-galactosyltransferase, polypeptide 5 [Source:MGI Symbol;Acc:MGI:2136878]	Up	0.82467	7.52105	2082	6765	0.00171148	0.01507
Frg1	FSHD region gene 1 [Source:MGI Symbol;Acc:MGI:893597]	Down	-0.864844	6.02918	1456.6	1395.67	0.00173313	0.0152522
Fdps	farnesyl diphosphate synthetase [Source:MGI Symbol;Acc:MGI:104888]	Up	0.816061	7.59242	2258	6873.5	0.00173828	0.0152888
Tns1	tensin 1 [Source:MGI Symbol;Acc:MGI:104552]	Up	7.81666	-0.44422	0	33	0.00174538	0.0153427
Cltb	clathrin, light polypeptide (Lcb) [Source:MGI Symbol;Acc:MGI:1921575]	Up	0.676246	7.97274	3250.2	8972.17	0.00175002	0.0153676
Ltb4r2	leukotriene B4 receptor 2 [Source:MGI Symbol;Acc:MGI:1888501]	Up	7.10966	-1.04835	0	20.1667	0.00175017	0.0153676
Slc4a4	solute carrier family 4 (anion exchanger), member 4 [Source:MGI Symbol;Acc:MGI:1927555]	Down	-1.32011	5.27335	956.4	666.833	0.00175773	0.0154253
Ndufa13	NADH:ubiquinone oxidoreductase subunit A13 [Source:MGI Symbol;Acc:MGI:1914434]	Up	0.782457	8.46248	4453.8	12840	0.00176343	0.0154668
Txndc5	thioredoxin domain containing 5 [Source:MGI Symbol;Acc:MGI:2145316]	Up	0.675548	8.22352	3889.8	10395	0.00176553	0.0154765
Capza1	capping actin protein of muscle Z-line subunit alpha 1 [Source:MGI Symbol;Acc:MGI:106227]	Down	-1.04382	6.09964	1618.8	1308	0.00176813	0.0154906
Gm29733	#N/A	Up	7.20411	-0.973308	0	19.3333	0.0017718	0.0155141
Lsm4	LSM4 homolog, U6 small nuclear RNA and mRNA degradation associated [Source:MGI Symbol;Acc:MGI:1354692]	Up	0.855635	7.11171	1768	5272.33	0.00178361	0.0156088
Vsig2	V-set and immunoglobulin domain containing 2 [Source:MGI Symbol;Acc:MGI:1928009]	Up	4.0535	6.22676	150.2	3565.33	0.0017931	0.0156831
Cetn2	centrin 2 [Source:MGI Symbol;Acc:MGI:1347085]	Down	-1.72531	4.57502	620	349.833	0.00180868	0.0158106
Ndufs2	NADH:ubiquinone oxidoreductase core subunit S2 [Source:MGI Symbol;Acc:MGI:2385112]	Up	0.714461	8.26493	4092.2	11177.8	0.00182547	0.0159485
Kcnc3	potassium voltage gated channel, Shaw-related subfamily, member 3 [Source:MGI Symbol;Acc:MGI:96669]	Up	5.76524	0.230114	0.6	48.6667	0.00182876	0.0159683
Grhpr	glyoxylate reductase/hydroxypyruvate reductase [Source:MGI Symbol;Acc:MGI:1923488]	Up	1.34365	5.20535	355.6	1478	0.00184392	0.0160918
LOC115489596	#N/A	Up	8.23457	-0.0713082	0	40.8333	0.00186608	0.0162761
Rnu11	U11 small nuclear RNA [Source:MGI Symbol;Acc:MGI:2148804]	Up	7.79146	-0.459805	0	46.1667	0.00186804	0.0162811
Plekha8	pleckstrin homology domain containing, family A (phosphoinositide binding specific) member 8 [Source:MGI Symbol;Acc:MGI:2681164]	Down	-0.841036	6.76005	2301	2253.83	0.00186873	0.0162811
Ciita	class II transactivator [Source:MGI Symbol;Acc:MGI:108445]	Up	7.00492	-1.13236	0	20.8333	0.00187198	0.0163003
Iqgap2	IQ motif containing GTPase activating protein 2 [Source:MGI Symbol;Acc:MGI:2449975]	Up	0.718643	7.52227	3984.4	4096.5	0.00187404	0.0163093
Surf4	surfeit gene 4 [Source:MGI Symbol;Acc:MGI:98445]	Up	0.757633	7.50188	2411.6	6441.83	0.00188589	0.0164032
Ugp2	UDP-glucose pyrophosphorylase 2 [Source:MGI Symbol;Acc:MGI:2183447]	Up	0.736445	6.96987	2768.4	2833.33	0.00189178	0.0164428
Gm21370	predicted gene, 21370 [Source:MGI Symbol;Acc:MGI:5434725]	Up	5.86578	-0.00592869	0.4	47.1667	0.00189252	0.0164428
Zfp993	zinc finger protein 993 [Source:MGI Symbol;Acc:MGI:3713585]	Up	8.13903	-0.158932	0	36.8333	0.00189914	0.0164911
Slc35a2	solute carrier family 35 (UDP-galactose transporter), member A2 [Source:MGI Symbol;Acc:MGI:1345297]	Up	2.90589	4.85691	112.8	1469.33	0.00190392	0.0165234
Nlrc3	NLR family, CARD domain containing 3 [Source:MGI Symbol;Acc:MGI:2444070]	Up	7.82925	-0.435927	0	30	0.00191231	0.0165871
Tmem174	transmembrane protein 174 [Source:MGI Symbol;Acc:MGI:1915594]	Up	7.20903	-0.966762	0	20.5	0.0019185	0.0166316
D8Ertd738e	DNA segment, Chr 8, ERATO Doi 738, expressed [Source:MGI Symbol;Acc:MGI:1289231]	Up	0.726439	7.12886	1756.6	4944.33	0.00193342	0.0167517
Ing1	inhibitor of growth family, member 1 [Source:MGI Symbol;Acc:MGI:1349481]	Down	-1.30346	5.30691	977	708.833	0.00193536	0.0167592
Pbsn	probasin [Source:MGI Symbol;Acc:MGI:1860484]	Up	9.44955	1.06795	0	114.333	0.00195038	0.01688
St3gal4	ST3 beta-galactoside alpha-2,3-sialyltransferase 4 [Source:MGI Symbol;Acc:MGI:1316743]	Down	-1.01089	7.64793	4805.2	3940.5	0.00195549	0.0169149
Gm3052	predicted gene 3052 [Source:MGI Symbol;Acc:MGI:3781230]	Up	6.61484	-1.4412	0	14.6667	0.00196506	0.0169883
Otub1	OTU domain, ubiquitin aldehyde binding 1 [Source:MGI Symbol;Acc:MGI:2147616]	Up	0.893775	6.22379	815.8	2731.83	0.00196857	0.0170093
Spg7	SPG7, paraplegin matrix AAA peptidase subunit [Source:MGI Symbol;Acc:MGI:2385906]	Up	1.14811	6.28316	715.2	3051.17	0.00198802	0.0171679
1700029J07Rik	RIKEN cDNA 1700029J07 gene [Source:MGI Symbol;Acc:MGI:1916729]	Up	6.25974	-0.469459	0.2	33.3333	0.00198976	0.0171715
Plekhb1	pleckstrin homology domain containing, family B (evectins) member 1 [Source:MGI Symbol;Acc:MGI:1351469]	Up	6.87048	-1.24299	0	16.8333	0.00199063	0.0171715
Nucb1	nucleobindin 1 [Source:MGI Symbol;Acc:MGI:97388]	Up	0.644581	8.33057	4208.6	11212.3	0.00199969	0.0172402
Grn	granulin [Source:MGI Symbol;Acc:MGI:95832]	Up	1.08803	6.17309	702.4	2934.33	0.00200725	0.0172959
Oaz1	ornithine decarboxylase antizyme 1 [Source:MGI Symbol;Acc:MGI:109433]	Up	0.710123	8.18275	6409.6	6933	0.00201137	0.0173219
BC065397	cDNA sequence BC065397 [Source:MGI Symbol;Acc:MGI:3584520]	Up	8.4019	0.0812293	0	46	0.00201451	0.0173394
Ppy	pancreatic polypeptide [Source:MGI Symbol;Acc:MGI:97753]	Up	9.74229	1.35169	0	178.667	0.00203835	0.0175283
Coro2a	coronin, actin binding protein 2A [Source:MGI Symbol;Acc:MGI:1345966]	Down	-0.946238	7.23393	3505.4	2843.83	0.0020387	0.0175283
Gm39869	#N/A	Up	7.13069	-1.03162	0	19.5	0.00204764	0.0175956
Dym	dymeclin [Source:MGI Symbol;Acc:MGI:1918480]	Up	0.952338	6.09704	725.4	2487.5	0.00204969	0.0176035
H4c17	H4 clustered histone 17 [Source:MGI Symbol;Acc:MGI:2448441]	Up	8.13546	-0.163296	0	37.3333	0.00207892	0.0178448
Rps29	ribosomal protein S29 [Source:MGI Symbol;Acc:MGI:107681]	Up	0.665725	8.71879	5335.6	15411.7	0.00210125	0.0180266
A930038B10Rik	RIKEN cDNA A930038B10 gene [Source:MGI Symbol;Acc:MGI:2443813]	Up	6.82378	-1.27766	0	17.5	0.0021036	0.0180347
Gm52528	#N/A	Up	6.87061	-1.24097	0	18.5	0.00210449	0.0180347
Wnt6	wingless-type MMTV integration site family, member 6 [Source:MGI Symbol;Acc:MGI:98960]	Up	8.02843	-0.258295	0	35.3333	0.00210643	0.0180415
Hyi	hydroxypyruvate isomerase (putative) [Source:MGI Symbol;Acc:MGI:1915430]	Up	1.82273	5.22021	260.4	1668.67	0.00211086	0.018064
Nanos1	nanos C2HC-type zinc finger 1 [Source:MGI Symbol;Acc:MGI:2669254]	Up	7.86813	-0.399986	0	34.6667	0.00211136	0.018064
Gm19461	predicted gene, 19461 [Source:MGI Symbol;Acc:MGI:5011646]	Up	7.75026	-0.503334	0	30.1667	0.00212063	0.0181334
Rfx2	regulatory factor X, 2 (influences HLA class II expression) [Source:MGI Symbol;Acc:MGI:106583]	Up	7.97109	-0.307292	0	36.6667	0.00212553	0.0181654
Plin2	perilipin 2 [Source:MGI Symbol;Acc:MGI:87920]	Up	0.929624	6.54104	1169	3453.5	0.00214843	0.0183511
Slc37a1	solute carrier family 37 (glycerol-3-phosphate transporter), member 1 [Source:MGI Symbol;Acc:MGI:2446181]	Up	0.970038	6.94468	1437.6	4611	0.00215421	0.0183905
Trappc13	trafficking protein particle complex 13 [Source:MGI Symbol;Acc:MGI:1914225]	Down	-1.63162	4.84993	713	475.833	0.0021559	0.0183949
Carmil2	capping protein regulator and myosin 1 linker 2 [Source:MGI Symbol;Acc:MGI:2685431]	Up	7.76922	-0.4864	0	30.8333	0.0021608	0.0184267
Sec61a1	Sec61 alpha 1 subunit (S. cerevisiae) [Source:MGI Symbol;Acc:MGI:1858417]	Up	0.706343	7.38079	2104.6	6080	0.00216787	0.018477
Tfcp2l1	transcription factor CP2-like 1 [Source:MGI Symbol;Acc:MGI:2444691]	Up	0.707394	7.22633	1898	5122.5	0.00217044	0.0184833
Impdh2	inosine monophosphate dehydrogenase 2 [Source:MGI Symbol;Acc:MGI:109367]	Up	0.781227	7.5312	2451	6902.33	0.00217097	0.0184833
Vps35	VPS35 retromer complex component [Source:MGI Symbol;Acc:MGI:1890467]	Down	-1.15651	5.9584	1508	1159.83	0.00217442	0.0185026
LOC118568594	#N/A	Up	7.79334	-0.466773	0	29.8333	0.00217567	0.0185032
Gm33682	predicted gene, 33682 [Source:MGI Symbol;Acc:MGI:5592841]	Up	4.2917	0.464427	1.8	64.6667	0.00218107	0.0185391
Lrrd1	leucine rich repeats and death domain containing 1 [Source:MGI Symbol;Acc:MGI:3045299]	Up	7.49283	-0.725736	0	26	0.00219356	0.0186352
Fut8	fucosyltransferase 8 [Source:MGI Symbol;Acc:MGI:1858901]	Up	1.19685	5.60112	471.2	1951.17	0.00220017	0.0186812
Prpsap1	phosphoribosyl pyrophosphate synthetase-associated protein 1 [Source:MGI Symbol;Acc:MGI:1915013]	Up	0.955459	7.70641	2405.6	7220	0.00220474	0.0187099
Mdp1	magnesium-dependent phosphatase 1 [Source:MGI Symbol;Acc:MGI:1915131]	Up	0.744216	7.35879	1977.4	5816.83	0.00222759	0.0188936
Dkkl1	dickkopf-like 1 [Source:MGI Symbol;Acc:MGI:1354963]	Up	7.12298	-1.03945	0	19.3333	0.00224103	0.0189973
Asb16	ankyrin repeat and SOCS box-containing 16 [Source:MGI Symbol;Acc:MGI:2654437]	Up	6.70867	0.768228	0.4	87.3333	0.00224488	0.0190091
Gm26728	predicted gene, 26728 [Source:MGI Symbol;Acc:MGI:5477222]	Up	6.21106	-0.51486	0.2	29	0.00224599	0.0190091
Efhd2	EF hand domain containing 2 [Source:MGI Symbol;Acc:MGI:106504]	Down	-0.755797	7.73684	5033.6	4675.5	0.00224606	0.0190091
Svs3b	seminal vesicle secretory protein 3B [Source:MGI Symbol;Acc:MGI:3583778]	Up	9.64	1.25294	0	166.833	0.00224796	0.019015
Cirbp	cold inducible RNA binding protein [Source:MGI Symbol;Acc:MGI:893588]	Up	1.39944	5.89943	496.6	2307	0.00225437	0.0190589
Birc5	baculoviral IAP repeat-containing 5 [Source:MGI Symbol;Acc:MGI:1203517]	Up	1.04268	5.74577	567	2075.83	0.0022572	0.0190726
Lat	linker for activation of T cells [Source:MGI Symbol;Acc:MGI:1342293]	Up	8.37239	0.0574877	0	60.3333	0.00225978	0.0190841
Gm45914	#N/A	Up	7.14218	-1.02126	0	20.1667	0.00226619	0.0191279
Clca2	chloride channel accessory 2 [Source:MGI Symbol;Acc:MGI:2139758]	Down	-9.84433	1.18831	96.6	0	0.00226971	0.0191473
Pdzk1ip1	PDZK1 interacting protein 1 [Source:MGI Symbol;Acc:MGI:1914432]	Up	1.17844	6.12736	669.6	3045.67	0.00227492	0.019181
Cela1	chymotrypsin-like elastase family, member 1 [Source:MGI Symbol;Acc:MGI:95314]	Up	1.59211	7.50696	1443.6	9520.17	0.0022849	0.0192413
Gsdmc4	gasdermin C4 [Source:MGI Symbol;Acc:MGI:1921798]	Down	-1.48	9.35288	17277	12743.3	0.00228536	0.0192413
Kbtbd3	kelch repeat and BTB (POZ) domain containing 3 [Source:MGI Symbol;Acc:MGI:1916399]	Up	8.64296	0.309958	0	81.5	0.00228576	0.0192413
Spata1	spermatogenesis associated 1 [Source:MGI Symbol;Acc:MGI:1918201]	Up	7.26966	-0.910722	0	29.3333	0.00229397	0.0193001
Foxp4	forkhead box P4 [Source:MGI Symbol;Acc:MGI:1921373]	Up	0.89944	6.85393	1366.6	4154.5	0.00229533	0.0193012
Cdkn1a	cyclin-dependent kinase inhibitor 1A (P21) [Source:MGI Symbol;Acc:MGI:104556]	Down	-0.856074	7.45768	4052	3469.67	0.00231303	0.0194396
Rab18	RAB18, member RAS oncogene family [Source:MGI Symbol;Acc:MGI:102790]	Down	-1.06507	6.19914	1849.8	1474.83	0.00232169	0.019502
Ciz1	CDKN1A interacting zinc finger protein 1 [Source:MGI Symbol;Acc:MGI:1920234]	Up	1.09363	5.73164	595.2	2038	0.00232973	0.0195536
Malsu1	mitochondrial assembly of ribosomal large subunit 1 [Source:MGI Symbol;Acc:MGI:1922843]	Down	-1.34536	4.93964	817.4	527	0.00233034	0.0195536
Ssx2ip	synovial sarcoma, X 2 interacting protein [Source:MGI Symbol;Acc:MGI:2139150]	Down	-0.958112	5.98182	1474.4	1244.83	0.00233289	0.0195592
Gm51604	#N/A	Up	7.72386	-0.52457	0	33.5	0.0023335	0.0195592
Phyh	phytanoyl-CoA hydroxylase [Source:MGI Symbol;Acc:MGI:891978]	Up	0.684917	7.67943	4417.6	4696.67	0.00234212	0.0196187
Spta1	spectrin alpha, erythrocytic 1 [Source:MGI Symbol;Acc:MGI:98385]	Down	-10.1613	1.49325	103.8	0	0.00234309	0.0196187
Aup1	ancient ubiquitous protein 1 [Source:MGI Symbol;Acc:MGI:107789]	Up	0.670116	7.94843	3240	8606.33	0.00235284	0.0196898
Mrpl37	mitochondrial ribosomal protein L37 [Source:MGI Symbol;Acc:MGI:1926268]	Up	1.28702	6.0795	621.6	2755.17	0.00235977	0.0197373
Cep112it	centrosomal protein 112, intronic transcript [Source:MGI Symbol;Acc:MGI:3649867]	Down	-5.76164	1.56466	102.6	3.33333	0.00236688	0.0197862
Fam187b	family with sequence similarity 187, member B [Source:MGI Symbol;Acc:MGI:1923665]	Up	9.06359	0.702497	0	98.3333	0.00237741	0.0198636
Lrrk2	leucine-rich repeat kinase 2 [Source:MGI Symbol;Acc:MGI:1913975]	Up	9.36176	0.98302	0	103.667	0.0023812	0.0198847
Lias	lipoic acid synthetase [Source:MGI Symbol;Acc:MGI:1934604]	Up	1.09351	5.73273	516	2039	0.0023869	0.0199217
Gm4961	predicted pseudogene 4961 [Source:MGI Symbol;Acc:MGI:3645260]	Up	7.5018	-0.71148	0	37.1667	0.00240056	0.0200239
Gm36208	predicted gene, 36208 [Source:MGI Symbol;Acc:MGI:5595367]	Up	7.74072	-0.512207	0	29.6667	0.00240169	0.0200239
Oas1b	2'-5' oligoadenylate synthetase 1B [Source:MGI Symbol;Acc:MGI:97430]	Up	6.8379	-1.26772	0	16.5	0.00243492	0.0202818
Atp6v1e1	ATPase, H+ transporting, lysosomal V1 subunit E1 [Source:MGI Symbol;Acc:MGI:894326]	Down	-0.829925	6.42498	1906.2	1856.67	0.00243521	0.0202818
Kcnk16	potassium channel, subfamily K, member 16 [Source:MGI Symbol;Acc:MGI:1921821]	Up	6.821	-1.2867	0	14.1667	0.0024463	0.0203634
Zswim8	zinc finger SWIM-type containing 8 [Source:MGI Symbol;Acc:MGI:1919156]	Up	1.80453	4.90757	179.4	1282.67	0.00247156	0.0205627
Lmna	lamin A [Source:MGI Symbol;Acc:MGI:96794]	Up	0.64783	8.57944	5279.2	13839.3	0.00249345	0.0207338
Tle5	TLE family member 5, transcriptional modulator [Source:MGI Symbol;Acc:MGI:95806]	Up	0.618117	9.58738	16604.2	17528.7	0.00249692	0.0207517
Coa5	cytochrome C oxidase assembly factor 5 [Source:MGI Symbol;Acc:MGI:1923428]	Down	-0.940722	6.90378	2754.8	2341.17	0.0025005	0.0207704
Drc3	dynein regulatory complex subunit 3 [Source:MGI Symbol;Acc:MGI:1921915]	Up	6.3228	-0.189948	0.2	42.6667	0.00250227	0.0207741
N4bp1	NEDD4 binding protein 1 [Source:MGI Symbol;Acc:MGI:2136825]	Down	-1.24992	5.63241	1154.4	910	0.00251944	0.020895
Sil1	SIL1 nucleotide exchange factor [Source:MGI Symbol;Acc:MGI:1932040]	Up	1.34315	6.12053	695.2	2810.83	0.00251949	0.020895
Exosc5	exosome component 5 [Source:MGI Symbol;Acc:MGI:107889]	Up	1.15771	5.76773	581.4	2202.5	0.0025787	0.0213747
Lgals9	lectin, galactose binding, soluble 9 [Source:MGI Symbol;Acc:MGI:109496]	Down	-0.960757	7.21665	3396.6	2789.83	0.00258506	0.0214068
Svs6	seminal vesicle secretory protein 6 [Source:MGI Symbol;Acc:MGI:106178]	Up	10.1678	1.76481	0	275.667	0.00258551	0.0214068
Rangap1	RAN GTPase activating protein 1 [Source:MGI Symbol;Acc:MGI:103071]	Up	0.717295	7.01189	1654.4	4570	0.00258769	0.0214068
Sf3a2	splicing factor 3a, subunit 2 [Source:MGI Symbol;Acc:MGI:104912]	Up	1.01279	5.63523	570.6	1835.5	0.00258803	0.0214068
Aplp2	amyloid beta (A4) precursor-like protein 2 [Source:MGI Symbol;Acc:MGI:88047]	Up	0.888948	6.60597	1053.8	3718.67	0.00258991	0.0214111
Gm20605	predicted gene 20605 [Source:MGI Symbol;Acc:MGI:5306917]	Up	9.10309	0.737707	0	89.5	0.00261271	0.0215882
Rsph9	radial spoke head 9 homolog (Chlamydomonas) [Source:MGI Symbol;Acc:MGI:1922814]	Up	9.17191	0.803115	0	84.8333	0.00263549	0.021765
Igsf9	immunoglobulin superfamily, member 9 [Source:MGI Symbol;Acc:MGI:2135283]	Up	1.63855	4.68576	192.6	1065.67	0.00263983	0.0217894
Eif4g2	eukaryotic translation initiation factor 4, gamma 2 [Source:MGI Symbol;Acc:MGI:109207]	Down	-0.720301	8.33012	7046.6	7046	0.00264697	0.0218368
Arc	activity regulated cytoskeletal-associated protein [Source:MGI Symbol;Acc:MGI:88067]	Up	7.65299	-0.589595	0	27.5	0.00265391	0.0218825
Snd1	staphylococcal nuclease and tudor domain containing 1 [Source:MGI Symbol;Acc:MGI:1929266]	Up	0.966653	6.21211	858.4	2833.83	0.00266601	0.0219708
Cacfd1	calcium channel flower domain containing 1 [Source:MGI Symbol;Acc:MGI:1924317]	Up	1.44523	6.19545	556.4	2998.5	0.00269953	0.0222353
Pfkp	phosphofructokinase, platelet [Source:MGI Symbol;Acc:MGI:1891833]	Up	0.688612	7.39265	3614	3755.5	0.0027074	0.0222885
Mybbp1a	MYB binding protein (P160) 1a [Source:MGI Symbol;Acc:MGI:106181]	Up	0.94249	6.15326	812	2584.33	0.00271973	0.0223744
Snhg1	small nucleolar RNA host gene 1 [Source:MGI Symbol;Acc:MGI:3763743]	Up	5.31852	3.66893	8.4	744.333	0.00272069	0.0223744
Wfikkn1	WAP, FS, Ig, KU, and NTR-containing protein 1 [Source:MGI Symbol;Acc:MGI:2670967]	Up	6.39033	0.607043	0.4	70.5	0.00273501	0.0224804
Paxbp1	PAX3 and PAX7 binding protein 1 [Source:MGI Symbol;Acc:MGI:1914617]	Up	4.44781	3.97453	23.6	847.333	0.00273811	0.0224941
Bhmt2	betaine-homocysteine methyltransferase 2 [Source:MGI Symbol;Acc:MGI:1891379]	Down	-9.986	1.32274	90.6	0	0.00274679	0.0225535
Gad2	glutamic acid decarboxylase 2 [Source:MGI Symbol;Acc:MGI:95634]	Up	5.44787	-0.951458	0.2	23	0.00275182	0.0225831
Esrra	estrogen related receptor, alpha [Source:MGI Symbol;Acc:MGI:1346831]	Down	-0.773201	7.64015	4741.2	4304	0.00276742	0.0226992
Lemd3	LEM domain containing 3 [Source:MGI Symbol;Acc:MGI:3580376]	Down	-2.89666	2.84038	214.8	56	0.0027697	0.0227061
Angel2	angel homolog 2 [Source:MGI Symbol;Acc:MGI:1196310]	Up	0.794256	6.48339	1081.2	3237.83	0.00277247	0.0227168
Wdr27	WD repeat domain 27 [Source:MGI Symbol;Acc:MGI:1918932]	Up	9.09371	0.729854	0	96.8333	0.0027892	0.022842
Zfp618	zinc finger protein 618 [Source:MGI Symbol;Acc:MGI:1919950]	Up	5.18522	3.61003	15.4	691.333	0.00279662	0.0228908
Eif4h	eukaryotic translation initiation factor 4H [Source:MGI Symbol;Acc:MGI:1341822]	Up	0.612201	7.80267	4749.6	5168.5	0.00280064	0.0229088
Acp5	acid phosphatase 5, tartrate resistant [Source:MGI Symbol;Acc:MGI:87883]	Up	0.810899	7.61274	2330.4	7650.5	0.00280173	0.0229088
Antxr1	anthrax toxin receptor 1 [Source:MGI Symbol;Acc:MGI:1916788]	Down	-9.96262	1.30026	90	0	0.00281443	0.0230007
Mvb12a	multivesicular body subunit 12A [Source:MGI Symbol;Acc:MGI:1920961]	Up	0.776792	6.7441	1340.2	3912.33	0.00281708	0.0230103
Atp6v0c-ps2	ATPase, H+ transporting, lysosomal V0 subunit C, pseudogene 2 [Source:MGI Symbol;Acc:MGI:2151816]	Up	1.78492	4.53826	167.4	974.833	0.0028225	0.0230426
Fastk	Fas-activated serine/threonine kinase [Source:MGI Symbol;Acc:MGI:1913837]	Up	1.02875	6.70368	1094.8	3840.83	0.00283106	0.0231004
Ido2	indoleamine 2,3-dioxygenase 2 [Source:MGI Symbol;Acc:MGI:2142489]	Up	9.06462	0.699076	0	69.1667	0.00283265	0.0231014
Ogt	O-linked N-acetylglucosamine (GlcNAc) transferase (UDP-N-acetylglucosamine:polypeptide-N-acetylglucosaminyl transferase) [Source:MGI Symbol;Acc:MGI:1339639]	Up	1.50698	5.09306	277.8	1483.83	0.00284384	0.0231806
Piwil4	piwi-like RNA-mediated gene silencing 4 [Source:MGI Symbol;Acc:MGI:3041167]	Up	9.19011	0.820576	0	88.1667	0.00285975	0.0232869
LOC118567836	#N/A	Up	7.21026	-0.96945	0	20.6667	0.00285985	0.0232869
Gm19417	#N/A	Up	4.61141	4.28594	36.4	976.833	0.00286942	0.0233419
Sar1a	secretion associated Ras related GTPase 1A [Source:MGI Symbol;Acc:MGI:98230]	Up	0.865856	6.18511	819	2638.67	0.00286958	0.0233419
Zfp607b	zinc finger protein 607B [Source:MGI Symbol;Acc:MGI:2148237]	Up	6.33276	-0.180386	0.2	46	0.00288031	0.0234059
Vps4b	vacuolar protein sorting 4B [Source:MGI Symbol;Acc:MGI:1100499]	Down	-0.827352	6.26088	1713.8	1608	0.00288043	0.0234059
Tmprss13	transmembrane protease, serine 13 [Source:MGI Symbol;Acc:MGI:2682935]	Up	9.75064	1.36054	0	195.5	0.00288227	0.0234088
Xrcc1	X-ray repair complementing defective repair in Chinese hamster cells 1 [Source:MGI Symbol;Acc:MGI:99137]	Up	1.32557	5.21225	313.2	1420.83	0.00288951	0.0234554
Bckdha	branched chain ketoacid dehydrogenase E1, alpha polypeptide [Source:MGI Symbol;Acc:MGI:107701]	Up	1.1935	5.83128	523.4	2283.83	0.00290764	0.0235904
Larp7	La ribonucleoprotein 7, transcriptional regulator [Source:MGI Symbol;Acc:MGI:107634]	Down	-1.22931	5.59631	1393.6	861	0.00290993	0.0235951
LOC118568191	#N/A	Up	7.05912	-1.0953	0	17	0.00291122	0.0235951
Iigp1	interferon inducible GTPase 1 [Source:MGI Symbol;Acc:MGI:1926259]	Up	9.2507	0.878257	0	95.5	0.0029213	0.0236645
Svs3a	seminal vesicle secretory protein 3A [Source:MGI Symbol;Acc:MGI:1927635]	Up	10.0905	1.68954	0	258.167	0.00293746	0.0237831
Pdx1	pancreatic and duodenal homeobox 1 [Source:MGI Symbol;Acc:MGI:102851]	Up	8.89746	0.54657	0	91.8333	0.00294487	0.0238308
Trim5	tripartite motif-containing 5 [Source:MGI Symbol;Acc:MGI:3646853]	Up	7.44288	-0.772188	0	23	0.00295334	0.0238871
Oip5os1	Opa interacting protein 5, opposite strand 1 [Source:MGI Symbol;Acc:MGI:1913852]	Down	-1.36314	5.00425	764.2	555.5	0.00296407	0.0239615
Tsn	translin [Source:MGI Symbol;Acc:MGI:109263]	Up	0.792096	6.61551	1184.2	3439.5	0.0029744	0.0240326
Gcdh	glutaryl-Coenzyme A dehydrogenase [Source:MGI Symbol;Acc:MGI:104541]	Up	1.40334	5.28066	368.4	1588.83	0.00298354	0.0240941
Cox7a2	cytochrome c oxidase subunit 7A2 [Source:MGI Symbol;Acc:MGI:1316715]	Up	0.765287	8.36234	4089	12143.5	0.00298811	0.0241185
Gnb1	guanine nucleotide binding protein (G protein), beta 1 [Source:MGI Symbol;Acc:MGI:95781]	Up	0.693392	8.35879	7311.8	7469.33	0.0030015	0.0242142
Kcnk7	potassium channel, subfamily K, member 7 [Source:MGI Symbol;Acc:MGI:1341841]	Up	7.25906	-0.930101	0	19.1667	0.00300633	0.0242407
Slc35b2	solute carrier family 35, member B2 [Source:MGI Symbol;Acc:MGI:1921086]	Up	1.36428	6.33046	730.6	3424	0.00302096	0.0243368
C1d	C1D nuclear receptor co-repressor [Source:MGI Symbol;Acc:MGI:1927354]	Down	-1.24583	4.9981	787.4	585.667	0.00302136	0.0243368
Galnt6	polypeptide N-acetylgalactosaminyltransferase 6 [Source:MGI Symbol;Acc:MGI:1891640]	Up	0.95478	7.00906	1552.6	4650.17	0.00303783	0.0244569
Npr1	natriuretic peptide receptor 1 [Source:MGI Symbol;Acc:MGI:97371]	Up	7.52131	-0.704383	0	24.3333	0.00304074	0.0244678
Pcbp2	poly(rC) binding protein 2 [Source:MGI Symbol;Acc:MGI:108202]	Up	0.724507	8.02238	5823	5910.83	0.00306159	0.024623
Smarcb1	SWI/SNF related, matrix associated, actin dependent regulator of chromatin, subfamily b, member 1 [Source:MGI Symbol;Acc:MGI:1328366]	Up	0.953755	6.4181	944.2	3214.83	0.00306757	0.0246584
Nccrp1	non-specific cytotoxic cell receptor protein 1 homolog (zebrafish) [Source:MGI Symbol;Acc:MGI:2685009]	Up	6.20885	0.44258	0.4	74.3333	0.00307585	0.0247123
Wdr47	WD repeat domain 47 [Source:MGI Symbol;Acc:MGI:2139593]	Up	8.99767	0.637808	0	73.1667	0.00307793	0.0247164
Eps8	epidermal growth factor receptor pathway substrate 8 [Source:MGI Symbol;Acc:MGI:104684]	Down	-1.00741	6.09276	1686.4	1280.5	0.00309766	0.024862
Emp1	epithelial membrane protein 1 [Source:MGI Symbol;Acc:MGI:107941]	Down	-1.74184	8.03974	7199	3223.17	0.0031069	0.0249235
Ap2s1	adaptor-related protein complex 2, sigma 1 subunit [Source:MGI Symbol;Acc:MGI:2141861]	Up	0.769112	7.90108	2945.6	8640.83	0.00311739	0.0249897
Sh3glb2	SH3-domain GRB2-like endophilin B2 [Source:MGI Symbol;Acc:MGI:2385131]	Up	1.15625	6.26537	807	2934.17	0.00311834	0.0249897
Pls1	plastin 1 (I-isoform) [Source:MGI Symbol;Acc:MGI:104809]	Down	-0.898018	6.95944	2824	2454.33	0.00312648	0.0250422
Uqcrfs1	ubiquinol-cytochrome c reductase, Rieske iron-sulfur polypeptide 1 [Source:MGI Symbol;Acc:MGI:1913944]	Up	0.57236	8.36677	6818.4	7885	0.00313029	0.0250599
Edaradd	EDAR (ectodysplasin-A receptor)-associated death domain [Source:MGI Symbol;Acc:MGI:1931001]	Up	6.57737	0.179327	0.2	53.6667	0.00313388	0.0250758
Mmp15	matrix metallopeptidase 15 [Source:MGI Symbol;Acc:MGI:109320]	Up	1.12349	7.17129	1576.6	5363.83	0.00314515	0.0251532
LOC118568567	#N/A	Up	6.61181	-1.44221	0	15.6667	0.00315315	0.0251893
Folr1	folate receptor 1 (adult) [Source:MGI Symbol;Acc:MGI:95568]	Up	7.76792	-0.488287	0	30.5	0.0031541	0.0251893
Gm32854	#N/A	Up	7.25469	-0.922091	0	28.1667	0.00315448	0.0251893
Psmd4	proteasome (prosome, macropain) 26S subunit, non-ATPase, 4 [Source:MGI Symbol;Acc:MGI:1201670]	Up	0.703095	7.72109	2614.4	7531.83	0.00319697	0.0255156
Epb41l3	erythrocyte membrane protein band 4.1 like 3 [Source:MGI Symbol;Acc:MGI:103008]	Down	-1.0301	6.34155	2104.4	1498	0.00320481	0.0255652
Slc22a18	solute carrier family 22 (organic cation transporter), member 18 [Source:MGI Symbol;Acc:MGI:1336884]	Up	0.782341	6.36635	982.8	2858.83	0.00321147	0.0256052
Rd3	retinal degeneration 3 [Source:MGI Symbol;Acc:MGI:1921273]	Up	6.22292	-0.506616	0.2	35.5	0.00321827	0.0256465
Fau	Finkel-Biskis-Reilly murine sarcoma virus (FBR-MuSV) ubiquitously expressed (fox derived) [Source:MGI Symbol;Acc:MGI:102547]	Up	0.63882	10.1508	15266	41686.8	0.00324564	0.0258514
Gm51806	#N/A	Up	6.28257	-0.455138	0.2	37.6667	0.00325587	0.0259198
Commd4	COMM domain containing 4 [Source:MGI Symbol;Acc:MGI:1913449]	Up	2.56493	4.82579	146	1394.17	0.00326309	0.0259641
Mirc35hg	#N/A	Up	5.71158	-0.0801984	0.4	51	0.00327664	0.0260587
Crebbp	CREB binding protein [Source:MGI Symbol;Acc:MGI:1098280]	Down	-1.13249	5.68746	1163.8	950	0.00329207	0.0261539
Hgsnat	heparan-alpha-glucosaminide N-acetyltransferase [Source:MGI Symbol;Acc:MGI:1196297]	Up	5.15301	3.54155	15	644.833	0.00329245	0.0261539
Smco1	single-pass membrane protein with coiled-coil domains 1 [Source:MGI Symbol;Acc:MGI:1916826]	Down	-5.28862	1.74774	92.2	3.66667	0.00329361	0.0261539
Ddx43	DEAD box helicase 43 [Source:MGI Symbol;Acc:MGI:3642857]	Up	8.56772	0.236931	0	60.6667	0.00329662	0.0261625
Gm33335	#N/A	Up	8.91335	0.555637	0	61	0.00329803	0.0261625
Vamp4	vesicle-associated membrane protein 4 [Source:MGI Symbol;Acc:MGI:1858730]	Down	-1.19195	5.11198	885.6	627.167	0.0033023	0.0261831
Chml	choroideremia-like [Source:MGI Symbol;Acc:MGI:101913]	Up	8.94606	0.5891	0	75.6667	0.0033236	0.0263387
Prkar1a	protein kinase, cAMP dependent regulatory, type I, alpha [Source:MGI Symbol;Acc:MGI:104878]	Down	-0.800218	6.39722	1885.4	1800.33	0.00333975	0.0264313
Cdca7l	cell division cycle associated 7 like [Source:MGI Symbol;Acc:MGI:2384982]	Up	5.38735	1.58205	1.8	158.167	0.00334012	0.0264313
LOC118568478	#N/A	Up	7.67132	-0.576506	0	27.5	0.00334034	0.0264313
Arf4	ADP-ribosylation factor 4 [Source:MGI Symbol;Acc:MGI:99433]	Down	-0.765226	7.91492	5576.4	5509.17	0.0033483	0.026481
Gm26797	predicted gene, 26797 [Source:MGI Symbol;Acc:MGI:5477291]	Up	6.75006	-1.33051	0	20.1667	0.00339166	0.0268074
Uba6	ubiquitin-like modifier activating enzyme 6 [Source:MGI Symbol;Acc:MGI:1913894]	Up	5.17635	1.22206	2.6	121.333	0.00339299	0.0268074
Ube2v1	ubiquitin-conjugating enzyme E2 variant 1 [Source:MGI Symbol;Acc:MGI:1913839]	Down	-0.957095	5.90869	1455.8	1208.17	0.00340142	0.0268604
Gm32481	#N/A	Up	6.89296	-1.22137	0	19	0.00341255	0.0269348
Cma1	chymase 1, mast cell [Source:MGI Symbol;Acc:MGI:96941]	Up	9.19895	0.832835	0	130.333	0.00341511	0.0269414
Cyp4f13	cytochrome P450, family 4, subfamily f, polypeptide 13 [Source:MGI Symbol;Acc:MGI:2158641]	Up	1.25808	5.35688	442	1647.83	0.00343734	0.027092
Sorbs1	sorbin and SH3 domain containing 1 [Source:MGI Symbol;Acc:MGI:700014]	Down	-1.65771	4.48482	619.6	305	0.00343765	0.027092
Mon1a	MON1 homolog A, secretory traffciking associated [Source:MGI Symbol;Acc:MGI:1920075]	Up	1.02879	6.48128	1074.8	3234.33	0.00347229	0.0273513
Scgb2b7	secretoglobin, family 2B, member 7 [Source:MGI Symbol;Acc:MGI:3782864]	Up	9.05317	0.692896	0	105.5	0.00348111	0.0274069
Fmn2	formin 2 [Source:MGI Symbol;Acc:MGI:1859252]	Down	-9.51149	0.866264	73	0	0.00349357	0.0274913
Fxyd4	FXYD domain-containing ion transport regulator 4 [Source:MGI Symbol;Acc:MGI:1889005]	Up	8.63602	0.301633	0	70.6667	0.0035107	0.0276122
Arap1	ArfGAP with RhoGAP domain, ankyrin repeat and PH domain 1 [Source:MGI Symbol;Acc:MGI:1916960]	Up	1.49876	6.9452	1046.4	4952.33	0.00352465	0.0277081
Adig	adipogenin [Source:MGI Symbol;Acc:MGI:2675492]	Up	7.22973	-0.949031	0	21.3333	0.00353478	0.0277738
Fuom	fucose mutarotase [Source:MGI Symbol;Acc:MGI:1916314]	Up	0.859965	6.33091	895.2	3015.67	0.00354716	0.0278464
[truncated: 13,693 more rows]
